# Supplementary material for: Paired electrochemical C–H bromination of (hetero)arenes with 2-bromoethan-1-ol
Source: Royal Society of Chemistry journal article supplement (doi:10.1039/d2qo01425d), 2023-01-01

## ***Supporting Information for***

# **Paired electrochemical C–H bromination of (hetero)arenes with 2-bromoethan-1-ol**

Yanxia Lv,<sup>a,b</sup> Zhong-Wei Hou,<sup>\*a</sup> Pinhua Li,<sup>b</sup> and Lei Wang<sup>\*a,b,c</sup>

<sup>a</sup> Advanced Research Institute and School of Pharmaceutical Sciences, Taizhou University, Jiaojiang, Zhejiang 318000, P. R. China

<sup>b</sup> Department of Chemistry, Huaibei Normal University, Huaibei, Anhui 235000, P. R. China

<sup>c</sup> State Key Laboratory of Organometallic Chemistry, Shanghai Institute of Organic Chemistry, Chinese Academy of Sciences, Shanghai 200032, P. R. China

### ***Table of Contents***

|                                                                    |            |
|--------------------------------------------------------------------|------------|
| <b>1. General Considerations.....</b>                              | <b>S2</b>  |
| <b>2. General Procedure for the Electrosynthesis .....</b>         | <b>S2</b>  |
| <b>3. Mechanistic Studies .....</b>                                | <b>S3</b>  |
| <b>4. Unsuccessful Substrates .....</b>                            | <b>S5</b>  |
| <b>5. Formation of Product 46.....</b>                             | <b>S5</b>  |
| <b>6. Characterization Data for the Electrolysis Products.....</b> | <b>S6</b>  |
| <b>7. NMR Spectra for Products .....</b>                           | <b>S20</b> |

## 1. General Considerations

Unless otherwise noted, chemicals and materials were purchased from commercial suppliers and used without further purification. All  $^1\text{H}$  NMR and  $^{13}\text{C}$  NMR spectra were recorded on a 400 MHz Bruker FT-NMR spectrometer. Data were reported as chemical shifts in ppm relative to TMS (0.00 ppm) or DMSO- $d_6$  (2.50 ppm) for  $^1\text{H}$  NMR and  $\text{CDCl}_3$  (77.2 ppm) or DMSO- $d_6$  (40.0 ppm) for  $^{13}\text{C}$  NMR. The abbreviations used for explaining the multiplicities were as follows: s = singlet, d = doublet, t = triplet, q = quartet, m = multiplet. The coupling constants,  $J$ , are reported in Hertz (Hz). High resolution mass spectroscopy data of the product were collected on a Thermofisher Q Exactive Accurate-Mass Q-Orbitrap LC/MS (HESI). X-Ray data were collected on a Bruker SMART APEX II instrument with an I $\mu$ S Mo microsource ( $\lambda = 0.7107 \text{ \AA}$ ). Products were purified by flash chromatography on 200–300 mesh silica gels,  $\text{SiO}_2$ .

## 2. General Procedure for the Electrosynthesis

**General procedure for the model reaction:** A 20 mL three-necked beaker-type cell (Figure S1A) was charged with  $n\text{Bu}_4\text{NBF}_4$  (0.15 mmol). The cell was equipped with a reticulated vitreous carbon (RVC, 100 PPI, 1.2 cm x 0.8 cm x 0.8 cm) anode and a platinum plate (1.0 cm x 1.0 cm x 0.1 mm) cathode (Figure S1B). 1-Methoxy-4-propylbenzene (**1**, 0.30 mmol), 2-bromoethan-1-ol (**2**, 0.9 mmol), MeCN (7.0 mL) were added. The electrolysis was carried out at room temperature using a constant current of 10 mA for 3.0 h. The reaction mixture was concentrated under reduced pressure and the residue was chromatographed through silica gel eluting with ethyl acetate/petroleum ether to give the desired product.

**General procedure for the gram-scale synthesis of 3:** The gram-scale electrolysis was conducted in a 100 mL three-necked round-bottomed flask with a piece of RVC (1.2 cm x 2.0 cm x 2.0 cm) as the anode, a Pt plate as the cathode (1.5 cm x 1.5 cm x 0.3 mm), and a constant current of 62 mA for 10 h at room temperature (Figure S1C). The reaction mixture consisted 1-methoxy-4-propylbenzene (**1**, 0.90 g, 6.0 mmol), 2-

bromoethan-1-ol (**2**, 2.25 g, 9.0 mmol),  $n\text{Bu}_4\text{NBF}_4$  (0.99 g, 3.0 mmol), MeCN (90 mL). When the reaction was complete, the reaction mixture was concentrated under reduced pressure and the residue was chromatographed through silica gel eluting with ethyl acetate/petroleum ether to give the desired product **3** (0.67 g, 55% yield).

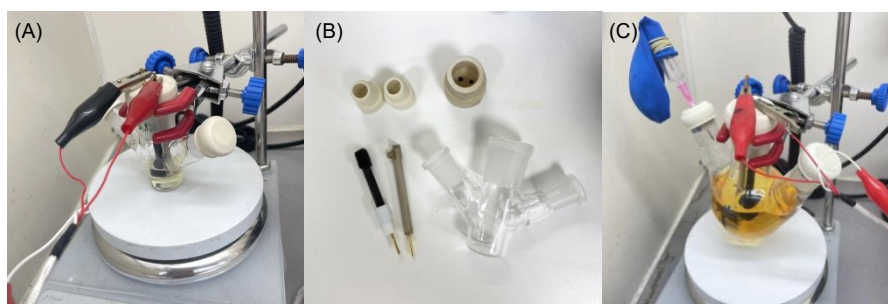

**Figure S1.** The electrolysis setup [The RVC is fixed on a sharpened graphite rod ( $\varnothing$  6 mm)].

### 3. Mechanistic Studies

#### 3.1 Cyclic voltammetry studies

The cyclic voltammograms were recorded in an electrolyte of  $n\text{Bu}_4\text{NBF}_4$  (0.1 M) in MeCN (5 mL) using a glassy carbon disk working electrode (diameter, 3 mm), a Pt wire auxiliary electrode and a Ag/AgCl reference electrode. The scan rate was 100 mV/s.

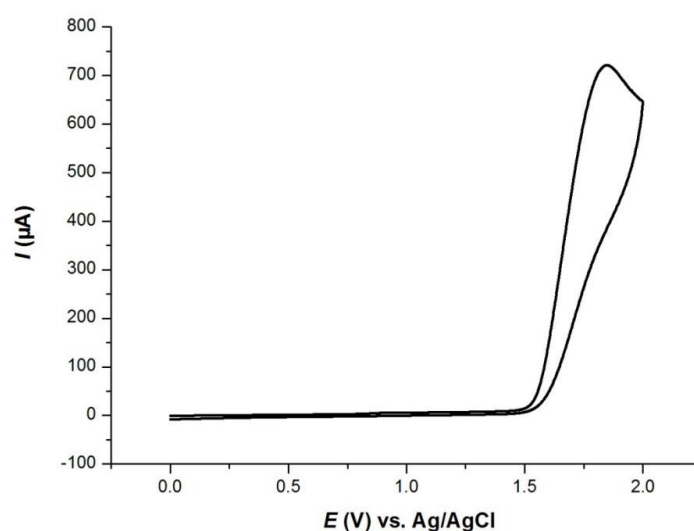

**Figure S2.** Cyclic voltammogram of 1-methoxy-4-propylbenzene in an electrolyte of  $n\text{Bu}_4\text{NBF}_4$  (0.1 M) in MeCN,  $E_{p/2} = 1.66$  V.

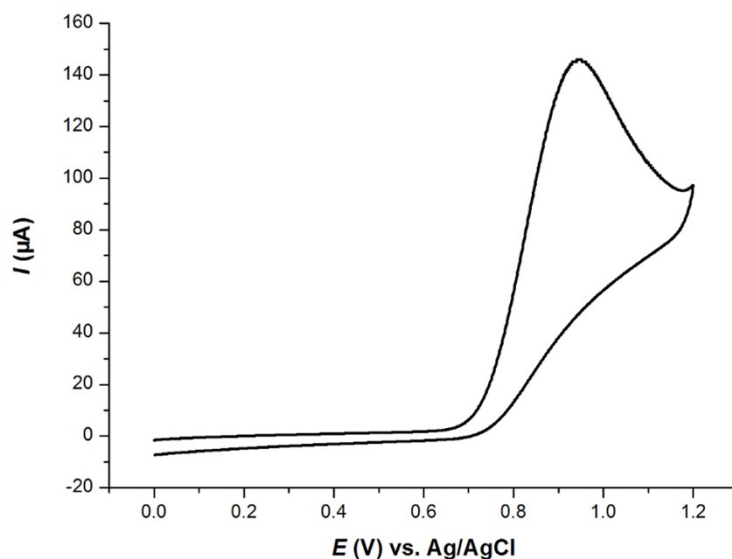

**Figure S3.** Cyclic voltammogram of  $n\text{Bu}_4\text{NBr}$  in an electrolyte of  $n\text{Bu}_4\text{NBF}_4$  (0.1 M) in MeCN,  $E_{p/2} = 0.82$  V.

### 3.2 GC-MS analysis and detection of ethylene oxide

The reaction solution of **1** and **2** was detected by GC-MS analysis on a GCMS-QP2020 NX, and a peak of ethylene oxide was observed by comparison with standard diagram of spectral library. This proves that the bromide ion is formed by the reduction of 2-bromoethan-1-ol (**2**) at the cathode to release ethylene oxide.

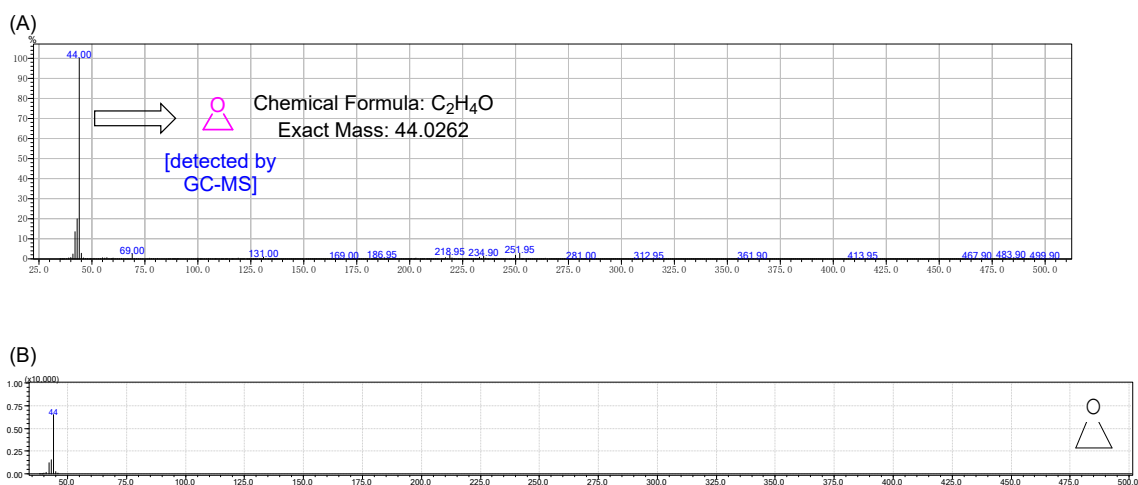

**Figure S4.** Test diagram (A) and standard diagram of spectral library (B)

## 4. Unsuccessful Substrates

(hetero)arenes

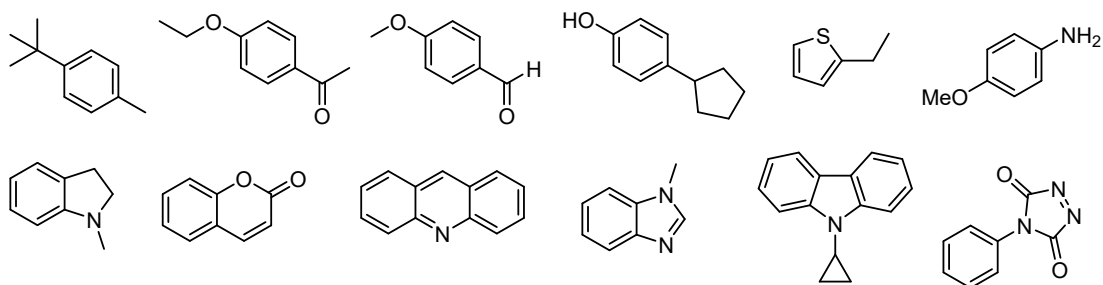

halogen or sulfur sources

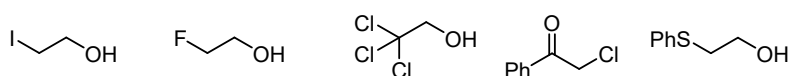

Figure S5. Unsuccessful substrates

## 5. Formation of Product 46

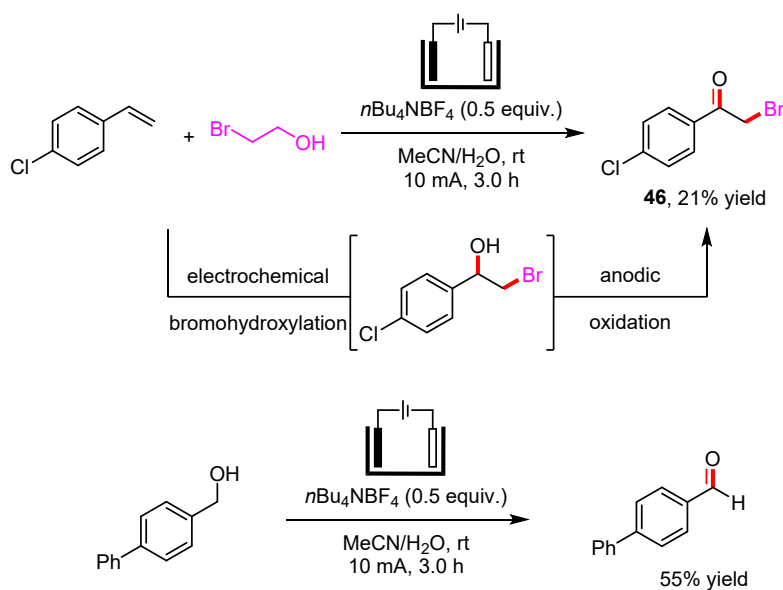

$\alpha$ -Bromoketone **46** may be formed by further oxidation of benzyl alcohol intermediate produced by the electrochemical bromohydroxylation of 4-chlorostyrene. [1,1'-biphenyl]-4-ylmethanol could be oxidized at the anode to form [1,1'-biphenyl]-4-carbaldehyde in 55% yield under electrochemical conditions. Benzyl alcohol moiety is more easily oxidized than alkyl alcohol, which allows the bromohydroxylation product **47** to be obtained.

## 6. Characterization Data for the Electrolysis Products

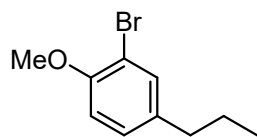

**2-Bromo-1-methoxy-4-propylbenzene (3)**<sup>[1]</sup>. Yellow oil (60.7 mg, 86% yield); <sup>1</sup>H NMR (400 MHz, CDCl<sub>3</sub>)  $\delta$  7.35 (d,  $J$  = 2.1 Hz, 1H), 7.05 (dd,  $J$  = 8.3, 2.1 Hz, 1H), 6.80 (d,  $J$  = 8.3 Hz, 1H), 3.85 (s, 3H), 2.49 (t,  $J$  = 7.6 Hz, 2H), 1.62–1.56 (m, 2H), 0.91 (t,  $J$  = 7.3 Hz, 3H); <sup>13</sup>C NMR (101 MHz, CDCl<sub>3</sub>)  $\delta$  154.0, 136.5, 133.3, 128.4, 111.9, 111.4, 56.4, 36.9, 24.7, 13.8.

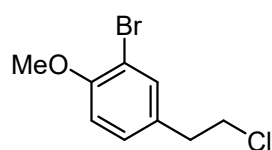

**2-Bromo-4-(2-chloroethyl)-1-methoxybenzene (4)**<sup>[2]</sup>. Colorless oil (64.0 mg, 86% yield); <sup>1</sup>H NMR (400 MHz, CDCl<sub>3</sub>)  $\delta$  7.40 (d,  $J$  = 2.1 Hz, 1H), 7.12 (dd,  $J$  = 8.4, 2.1 Hz, 1H), 6.84 (d,  $J$  = 8.4 Hz, 1H), 3.87 (s, 3H), 3.66 (t,  $J$  = 7.3 Hz, 2H), 2.98 (t,  $J$  = 7.3 Hz, 2H); <sup>13</sup>C NMR (101 MHz, CDCl<sub>3</sub>)  $\delta$  154.9, 133.7, 131.8, 129.0, 112.0, 111.7, 56.4, 45.1, 37.9.

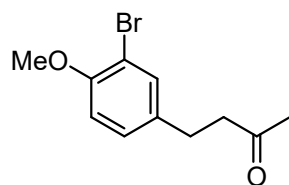

**4-(3-Bromo-4-methoxyphenyl)butan-2-one (5)**<sup>[3]</sup>. Yellow oil (66.0 mg, 86% yield); <sup>1</sup>H NMR (400 MHz, CDCl<sub>3</sub>)  $\delta$  7.36 (s, 1H), 7.09 (d,  $J$  = 8.4 Hz, 1H), 6.81 (d,  $J$  = 8.4 Hz, 1H), 3.86 (d,  $J$  = 1.2 Hz, 3H), 2.81 (t,  $J$  = 7.4 Hz, 2H), 2.72 (t,  $J$  = 7.4 Hz, 2H), 2.14 (s, 3H); <sup>13</sup>C NMR (101 MHz, CDCl<sub>3</sub>)  $\delta$  207.7, 154.2, 134.6, 133.0, 128.4, 111.9, 111.4, 56.2, 45.1, 30.2, 28.4.

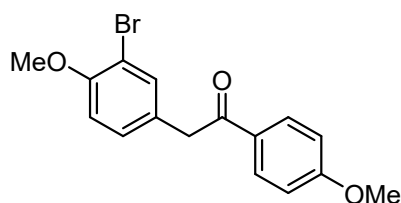

**2-(3-Bromo-4-methoxyphenyl)-1-(4-methoxyphenyl)ethan-1-one (6).** Yellow solid (58.0 mg, 58% yield); m.p. = 124.7–125.3 °C; <sup>1</sup>H NMR (400 MHz, CDCl<sub>3</sub>) δ 7.97 (d, *J* = 8.9 Hz, 2H), 7.44 (d, *J* = 2.1 Hz, 1H), 7.16 (dd, *J* = 8.4, 2.1 Hz, 1H), 6.93 (d, *J* = 8.9 Hz, 2H), 6.84 (d, *J* = 8.4 Hz, 1H), 4.14 (s, 2H), 3.88–3.86 (m, 6H); <sup>13</sup>C NMR (101 MHz, CDCl<sub>3</sub>) δ 196.0, 163.8, 154.9, 134.3, 131.0, 129.6, 129.5, 128.5, 114.0, 112.1, 111.8, 56.4, 55.6, 43.9; HRMS (ESI) ([M+H]<sup>+</sup>) Calcd. for C<sub>16</sub>H<sub>16</sub>BrO<sub>3</sub><sup>+</sup>: 335.0277, Found: 335.0271.

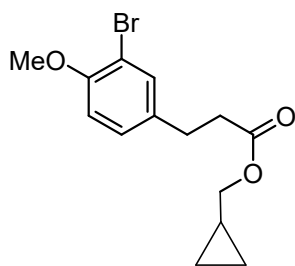

**Cyclopropylmethyl 3-(3-bromo-4-methoxyphenyl)propanoate (7).** Yellow oil (74.2 mg, 79% yield); <sup>1</sup>H NMR (400 MHz, CDCl<sub>3</sub>) δ 7.40 (d, *J* = 2.2 Hz, 1H), 7.11 (dd, *J* = 8.4, 2.2 Hz, 1H), 6.81 (d, *J* = 8.4 Hz, 1H), 3.89 (d, *J* = 7.3 Hz, 2H), 3.86 (s, 3H), 2.88 (t, *J* = 7.6 Hz, 2H), 2.61 (t, *J* = 7.6 Hz, 2H), 1.14–1.06 (m, 1H), 0.58–0.53 (m, 2H), 0.27–0.23 (m, 2H); <sup>13</sup>C NMR (101 MHz, CDCl<sub>3</sub>) δ 172.9, 154.4, 134.3, 133.2, 128.4, 112.0, 111.5, 69.4, 56.3, 36.0, 29.8, 9.9, 3.4; HRMS (ESI) ([M+H]<sup>+</sup>) Calcd. for C<sub>14</sub>H<sub>18</sub>BrO<sub>3</sub><sup>+</sup>: 313.0434, Found: 313.0430.

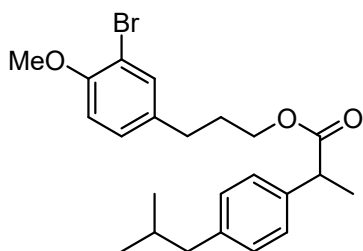

**3-(3-Bromo-4-methoxyphenyl)propyl 3-(4-isobutylphenyl)-2-methylpropanoate (8).** Yellow oil (87.2 mg, 67% yield); <sup>1</sup>H NMR (400 MHz, CDCl<sub>3</sub>) δ 7.25–7.19 (m, 3H), 7.11 (d, *J* = 8.0 Hz, 2H), 6.91 (dd, *J* = 8.4, 2.1 Hz, 1H), 6.75 (d, *J* = 8.4 Hz, 1H), 4.09–3.97 (m, 2H), 3.84 (s, 3H), 3.70 (q, *J* = 7.2 Hz, 1H), 2.47–2.40 (m, 4H), 1.88–1.77 (m, 3H), 1.49 (d, *J* = 7.2 Hz, 3H), 0.88 (d, *J* = 6.6 Hz, 6H); <sup>13</sup>C NMR (101 MHz, CDCl<sub>3</sub>) δ 174.8, 154.2, 140.7, 137.9, 134.9, 133.2, 129.5, 128.4, 127.3, 111.9, 111.5, 63.6, 56.3, 45.3, 45.1, 30.7, 30.3, 22.5, 18.4; HRMS (ESI) ([M+H]<sup>+</sup>) Calcd. for C<sub>23</sub>H<sub>30</sub>BrO<sub>3</sub><sup>+</sup>: 433.1373, Found: 433.1371.

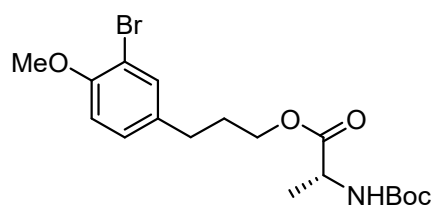

**3-(3-Bromo-4-methoxyphenyl)propyl (*tert*-butoxycarbonyl)-*D*-alaninate (9).** Yellow oil (86.3 mg, 69% yield);  $^1\text{H}$  NMR (400 MHz,  $\text{CDCl}_3$ )  $\delta$  7.37 (d,  $J = 2.1$  Hz, 1H), 7.08 (dd,  $J = 8.4, 2.1$  Hz, 1H), 6.83 (d,  $J = 8.4$  Hz, 1H), 5.10 (s, 1H), 4.35–4.28 (m, 1H), 4.13 (t,  $J = 6.5$  Hz, 2H), 3.87 (s, 3H), 2.62 (t,  $J = 7.4$  Hz, 2H), 1.97–1.90 (m, 2H), 1.45 (s, 9H), 1.39 (d,  $J = 7.4$  Hz, 3H);  $^{13}\text{C}$  NMR (101 MHz,  $\text{CDCl}_3$ )  $\delta$  173.5, 155.3, 154.3, 134.7, 133.2, 128.5, 112.0, 111.6, 80.0, 64.4, 56.4, 49.4, 30.9, 30.3, 28.4, 18.8; HRMS (ESI) ( $[\text{M}+\text{H}]^+$ ) Calcd. for  $\text{C}_{18}\text{H}_{27}\text{BrNO}_5^+$ : 416.1067, Found: 416.1063.

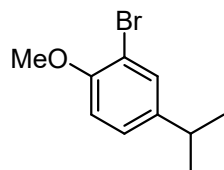

**2-Bromo-4-(*iso*-propyl)-1-methoxybenzene (10)**<sup>[4]</sup>. Yellow oil (68.9 mg, 69% yield);  $^1\text{H}$  NMR (400 MHz,  $\text{CDCl}_3$ )  $\delta$  7.40 (d,  $J = 2.2$  Hz, 1H), 7.11 (dd,  $J = 8.4, 2.2$  Hz, 1H), 6.82 (d,  $J = 8.4$  Hz, 1H), 3.86 (s, 3H), 2.87–2.78 (m, 1H), 1.21 (d,  $J = 7.0$  Hz, 6H);  $^{13}\text{C}$  NMR (101 MHz,  $\text{CDCl}_3$ )  $\delta$  154.0, 142.8, 131.4, 126.4, 112.0, 111.5, 56.4, 33.3, 24.2.

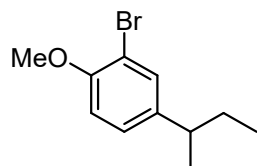

**2-Bromo-4-(*sec*-butyl)-1-methoxybenzene (11).** Yellow oil (50.0 mg 69% yield);  $^1\text{H}$  NMR (400 MHz,  $\text{CDCl}_3$ )  $\delta$  7.35 (d,  $J = 2.1$  Hz, 1H), 7.07 (dd,  $J = 8.4, 2.1$  Hz, 1H), 6.83 (d,  $J = 8.4$  Hz, 1H), 3.87 (s, 3H), 2.56–2.48 (m, 1H), 1.59–1.51 (m, 2H), 1.20 (d,  $J = 7.0$  Hz, 3H), 0.81 (t,  $J = 7.4$  Hz, 3H);  $^{13}\text{C}$  NMR (101 MHz,  $\text{CDCl}_3$ )  $\delta$  154.0, 141.6, 131.9, 127.1, 111.9, 111.5, 56.4, 40.8, 31.4, 22.1, 12.3; HRMS (ESI) ( $[\text{M}+\text{H}]^+$ ) Calcd. for  $\text{C}_{11}\text{H}_{16}\text{BrO}^+$ : 243.0379, Found: 243.0378.



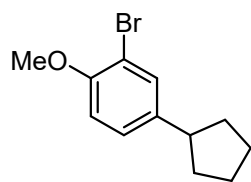

**2-Bromo-4-cyclopentyl-1-methoxybenzene (12).** Yellow oil (60.0 mg, 78% yield);  $^1\text{H}$  NMR (400 MHz,  $\text{CDCl}_3$ )  $\delta$  7.41 (d,  $J = 2.1$  Hz, 1H), 7.12 (dd,  $J = 8.4, 2.1$  Hz, 1H), 6.81 (d,  $J = 8.4$  Hz, 1H), 3.86 (s, 3H), 2.96–2.84 (m, 1H), 2.08–1.98 (m, 2H), 1.83–1.72 (m, 2H), 1.57–1.45 (m, 2H), 1.57–1.45 (m, 2H);  $^{13}\text{C}$  NMR (101 MHz,  $\text{CDCl}_3$ )  $\delta$  153.9, 140.4, 132.0, 127.1, 111.9, 111.5, 56.4, 45.0, 34.8, 25.5; HRMS (ESI) ( $[\text{M}+\text{H}]^+$ ) Calcd. for  $\text{C}_{12}\text{H}_{16}\text{BrO}^+$ : 255.0379, Found: 253.0379.

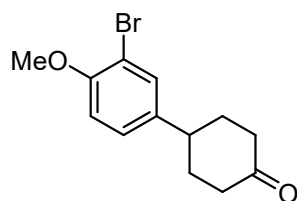

**4-(3-Bromo-4-methoxyphenyl)cyclohexan-1-one (13).** White solid (57.0 mg, 67% yield); m.p. = 81.5–82.2 °C;  $^1\text{H}$  NMR (400 MHz,  $\text{CDCl}_3$ )  $\delta$  7.43 (d,  $J = 2.2$  Hz, 1H), 7.15 (dd,  $J = 8.5, 2.2$  Hz, 1H), 6.86 (d,  $J = 8.5$  Hz, 1H), 3.88 (s, 3H), 3.01–2.93 (m, 1H), 2.53–2.45 (m, 4H), 2.24–2.14 (m, 2H), 1.96–1.81 (m, 2H);  $^{13}\text{C}$  NMR (101 MHz,  $\text{CDCl}_3$ )  $\delta$  211.0, 154.6, 138.6, 131.7, 126.7, 112.1, 111.7, 56.4, 41.7, 41.4, 34; HRMS (ESI) ( $[\text{M}+\text{H}]^+$ ) Calcd. for  $\text{C}_{13}\text{H}_{16}\text{BrO}_2^+$ : 283.0328 Found: 283.0323.

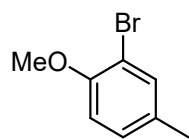

**2-Bromo-1-methoxy-4-methylbenzene (14)**<sup>[5]</sup>. Yellow oil (55.5 mg, 92% yield);  $^1\text{H}$  NMR (400 MHz,  $\text{CDCl}_3$ )  $\delta$  7.35 (d,  $J = 2.1$  Hz, 1H), 7.05 (dd,  $J = 8.4, 2.1$  Hz, 1H), 6.78 (d,  $J = 8.4$  Hz, 1H), 3.85 (s, 3H), 2.26 (s, 3H);  $^{13}\text{C}$  NMR (101 MHz,  $\text{CDCl}_3$ )  $\delta$  153.8, 133.8, 131.5, 129.0, 111.9, 111.3, 56.4, 20.3.

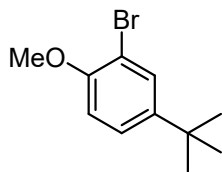

**2-Bromo-1-(*tert*-butyl)-4-methylbenzene (15)**<sup>61</sup>. Yellow oil (63.5 mg, 93% yield); <sup>1</sup>H NMR (400 MHz, CDCl<sub>3</sub>) δ 7.54 (d, *J* = 2.4 Hz, 1H), 7.27 (dd, *J* = 8.6, 2.4 Hz, 1H), 6.83 (d, *J* = 8.6 Hz, 1H), 3.87 (s, 3H), 1.29 (s, 9H); <sup>13</sup>C NMR (101 MHz, CDCl<sub>3</sub>) δ 153.7, 145.2, 130.6, 125.4, 111.6, 111.4, 56.4, 34.3, 31.5.

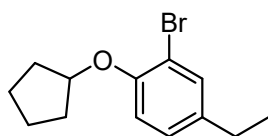

**2-Bromo-1-(cyclopentyloxy)-4-ethylbenzene (16)**. Yellow oil (52.5 mg, 65% yield); <sup>1</sup>H NMR (400 MHz, CDCl<sub>3</sub>) δ 7.36 (d, *J* = 2.2 Hz, 1H), 7.03 (dd, *J* = 8.3, 2.2 Hz, 1H), 6.81 (d, *J* = 8.3 Hz, 1H), 4.80–4.74 (m, 1H), 2.55 (q, *J* = 7.6 Hz, 2H), 1.94–1.81 (m, 6H), 1.66–1.59 (m, 2H), 1.19 (t, *J* = 7.6 Hz, 3H); <sup>13</sup>C NMR (101 MHz, CDCl<sub>3</sub>) δ 152.7, 137.7, 132.7, 127.6, 115.0, 113.1, 81.0, 32.9, 27.8, 24.1, 15.8; HRMS (ESI) ([M+H]<sup>+</sup>) Calcd. for C<sub>13</sub>H<sub>18</sub>BrO<sup>+</sup>: 269.0536, Found: 269.0534.

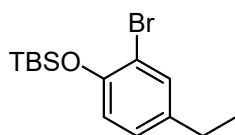

**(2-Bromo-4-ethylphenoxy)(*tert*-butyl)dimethylsilane (17)**. Colorless oil (28.0 mg, 30% yield); <sup>1</sup>H NMR (400 MHz, CDCl<sub>3</sub>) δ 7.16 (d, *J* = 2.2 Hz, 1H), 6.79 (dd, *J* = 8.2, 2.2 Hz, 1H), 6.60 (d, *J* = 8.2 Hz, 1H), 2.37 (q, *J* = 7.6 Hz, 2H), 1.01 (t, *J* = 7.6 Hz, 3H), 0.86 (s, 9H), 0.05 (s, 6H); <sup>13</sup>C NMR (101 MHz, CDCl<sub>3</sub>) δ 150.5, 138.6, 132.7, 127.7, 120.1, 115.1, 27.9, 25.9, 18.5, 15.8, -4.1; HRMS (ESI) ([M+H]<sup>+</sup>) Calcd. for C<sub>14</sub>H<sub>24</sub>BrOSi<sup>+</sup>: 315.0774, Found: 315.0774.

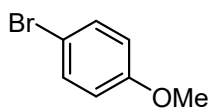

**1-Bromo-4-methoxybenzene (18)**<sup>[7]</sup>. Colorless oil (33.8 mg, 60% yield); <sup>1</sup>H NMR (400 MHz, CDCl<sub>3</sub>)  $\delta$  7.40–7.35 (m, 2H), 6.80–6.76 (m, 2H), 3.78 (s, 3H); <sup>13</sup>C NMR (101 MHz, CDCl<sub>3</sub>)  $\delta$  158.8, 132.4, 115.9, 113.0, 55.6.

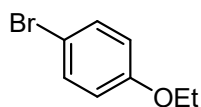

**1-Bromo-4-ethoxybenzene (19)**<sup>[8]</sup>. Yellow oil (32.0 mg, 53% yield); <sup>1</sup>H NMR (400 MHz, CDCl<sub>3</sub>)  $\delta$  7.36 (d, *J* = 6.4 Hz, 1H), 6.77 (d, *J* = 6.4 Hz, 1H), 3.99 (q, *J* = 7.0 Hz, 1H), 1.40 (t, *J* = 5.8 Hz, 2H); <sup>13</sup>C NMR (101 MHz, CDCl<sub>3</sub>)  $\delta$  158.2, 132.4, 116.4, 112.8, 63.9, 14.9.

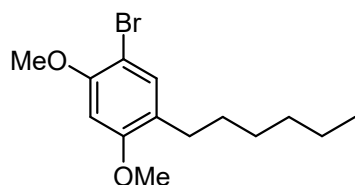

**1-Bromo-5-hexyl-2,4-dimethoxybenzene (20)**. Yellow oil (64.0 mg, 71% yield); <sup>1</sup>H NMR (400 MHz, CDCl<sub>3</sub>)  $\delta$  7.24 (s, 1H), 6.45 (s, 1H), 3.88 (s, 3H), 3.82 (s, 3H), 2.52–2.46 (m, 2H), 2.52–2.46 (m, 2H), 1.31–1.28 (m, 6H), 0.90–0.86 (m, 3H); <sup>13</sup>C NMR (101 MHz, CDCl<sub>3</sub>)  $\delta$  157.7, 154.7, 133.4, 125.3, 101.4, 96.7, 56.5, 55.8, 31.9, 30.0, 29.3 (2C), 22.8, 14.3; HRMS (ESI) ([*M*+*H*]<sup>+</sup>) Calcd. for C<sub>14</sub>H<sub>22</sub>BrO<sub>2</sub><sup>+</sup>: 301.0798, Found: 301.0794.

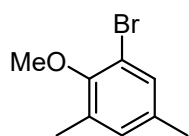

**1-Bromo-2-methoxy-3,5-dimethylbenzene (21)**. Yellow oil (28.5 mg, 44% yield); <sup>1</sup>H NMR (400 MHz, CDCl<sub>3</sub>)  $\delta$  6.98 (s, 1H), 6.96 (s, 1H), 3.79 (s, 3H), 2.29 (s, 3H), 2.13 (s, 3H); <sup>13</sup>C NMR (101 MHz, CDCl<sub>3</sub>)  $\delta$  156.4, 132.6, 129.2, 125.9, 121.5, 114.2, 55.8, 21.9, 15.9; HRMS (ESI) ([*M*+*H*]<sup>+</sup>) Calcd. for C<sub>9</sub>H<sub>12</sub>BrO<sup>+</sup>: 215.0066, Found: 215.0065.

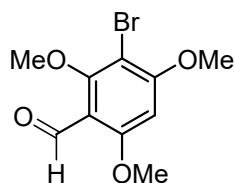

**3-Bromo-2,4,6-trimethoxybenzaldehyde (22).** Yellow solid (31.0 mg, 38% yield); m.p. = 115.1–116.0 °C;  $^1\text{H}$  NMR (400 MHz,  $\text{CDCl}_3$ )  $\delta$  10.28 (s, 1H), 6.32 (s, 1H), 3.99 (s, 3H), 3.95 (s, 3H), 3.90 (s, 3H);  $^{13}\text{C}$  NMR (101 MHz,  $\text{CDCl}_3$ )  $\delta$  187.4, 163.0, 162.1, 161.2, 113.8, 99.4, 92.1, 62.6, 56.7, 56.4; HRMS (ESI) ( $[\text{M}+\text{H}]^+$ ) Calcd. for  $\text{C}_{10}\text{H}_{12}\text{BrO}_4^+$ : 274.9913, Found: 274.9912.

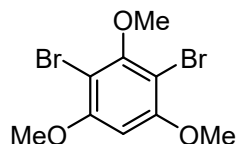

**2,4-Dibromo-1,3,5-trimethoxybenzene (23)**<sup>[9]</sup>. White solid (62.6 mg, 64% yield);  $^1\text{H}$  NMR (400 MHz,  $\text{CDCl}_3$ )  $\delta$  6.35 (s, 1H), 3.91 (s, 6H), 3.87 (s, 3H);  $^{13}\text{C}$  NMR (101 MHz,  $\text{CDCl}_3$ )  $\delta$  156.7, 155.8, 99.0, 93.3, 60.6, 56.7.

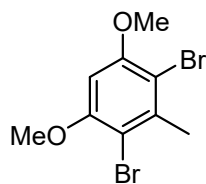

**2,4-Dibromo-1,3-dimethoxy-5-methylbenzene (24)**<sup>[10]</sup>. Yellow solid (64.0 mg, 69% yield);  $^1\text{H}$  NMR (400 MHz,  $\text{CDCl}_3$ )  $\delta$  6.41 (s, 1H), 3.90 (s, 6H), 2.61 (s, 3H);  $^{13}\text{C}$  NMR (101 MHz,  $\text{CDCl}_3$ )  $\delta$  155.8, 139.3, 105.8, 94.8, 56.7, 24.3.

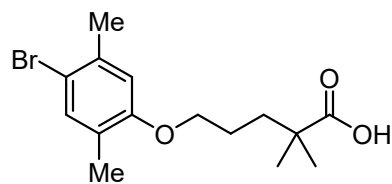

**5-(4-Bromo-2,5-dimethylphenoxy)-2,2-dimethylpentanoic acid (25)**<sup>[11]</sup>. Yellow solid (51.0 mg, 52% yield);  $^1\text{H}$  NMR (400 MHz,  $\text{CDCl}_3$ )  $\delta$  7.24 (s, 1H), 6.64 (s, 1H), 3.90 (t,  $J = 5.9$  Hz, 2H), 2.33 (s, 3H), 2.14 (s, 3H), 1.83–1.70 (m, 4H), 1.25 (s, 6H);  $^{13}\text{C}$  NMR (101 MHz,  $\text{CDCl}_3$ )  $\delta$  184.9, 156.3, 135.7, 133.8, 126.4, 114.7, 113.5, 68.3, 42.1, 36.9, 25.2, 25.1, 23.1, 15.6.

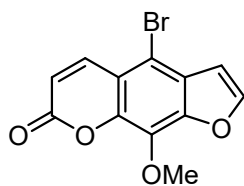

**4-Bromo-9-methoxy-7H-furo[3,2-g]chromen-7-one (26)**<sup>[9]</sup>. Yellow solid (37.0 mg, 42% yield); <sup>1</sup>H NMR (400 MHz, CDCl<sub>3</sub>) δ 8.12 (d, *J* = 9.8 Hz, 1H), 7.73 (d, *J* = 2.2 Hz, 1H), 6.88 (d, *J* = 2.2 Hz, 1H), 6.45 (d, *J* = 9.9 Hz, 1H), 4.29 (s, 3H); <sup>13</sup>C NMR (101 MHz, CDCl<sub>3</sub>) δ 160.0, 147.1, 146.8, 143.8, 142.8, 132.5, 128.1, 116.0, 115.8, 107.6, 105.7, 61.6.

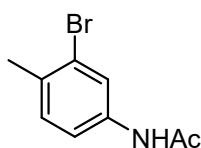

**N-(2-Bromo-4-methylphenyl)acetamide (27)**<sup>[8]</sup>. White solid (53.5 mg, 72% yield); <sup>1</sup>H NMR (400 MHz, CDCl<sub>3</sub>) δ 8.13 (d, *J* = 8.4 Hz, 1H), 7.57 (s, 1H), 7.34 (s, 1H), 7.09 (dd, *J* = 8.4, 1.9 Hz, 1H), 2.29 (s, 3H), 2.22 (s, 3H); <sup>13</sup>C NMR (101 MHz, CDCl<sub>3</sub>) δ 168.4, 135.4, 133.2, 132.5, 129.1, 122.2, 113.5, 24.9, 20.7.

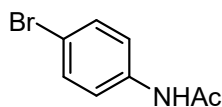

**N-(4-Bromophenyl)acetamide (28)**<sup>[5]</sup>. White solid (48.3 mg, 76% yield); <sup>1</sup>H NMR (400 MHz, DMSO-*d*<sub>6</sub>) δ 10.08 (s, 1H), 7.56 (d, *J* = 8.8 Hz, 2H), 7.47 (d, *J* = 8.8 Hz, 2H), 2.05 (s, 3H); <sup>13</sup>C NMR (101 MHz, DMSO-*d*<sub>6</sub>) δ 168.9, 139.1, 131.9, 121.3, 114.9, 24.5.

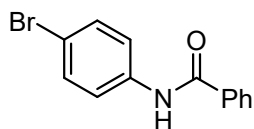

**N-(4-Bromophenyl)benzamide (29)**<sup>[12]</sup>. Yellow solid (39.2 mg, 48% yield); <sup>1</sup>H NMR (400 MHz, DMSO-*d*<sub>6</sub>) δ 10.40 (s, 1H), 7.97–7.92 (m, 2H), 7.80–7.75 (m, 2H), 7.64–7.52 (m, 5H); <sup>13</sup>C NMR (101 MHz, DMSO-*d*<sub>6</sub>) δ 166.2, 139.0, 135.2, 132.2, 131.9, 128.9, 128.2, 122.7, 115.8.

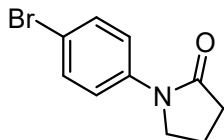

**1-(4-Bromophenyl)pyrrolidin-2-one (30)**<sup>[12]</sup>. Yellow solid (67.0 mg, 93% yield); <sup>1</sup>H NMR (400 MHz, CDCl<sub>3</sub>)  $\delta$  7.54–7.49 (m, 2H), 7.47–7.43 (m, 2H), 3.81 (t,  $J$  = 7.1 Hz, 2H), 2.59 (t,  $J$  = 8.1 Hz, 2H), 2.19–2.11 (m, 2H); <sup>13</sup>C NMR (101 MHz, CDCl<sub>3</sub>)  $\delta$  174.4, 138.5, 131.8, 121.3, 117.2, 48.6, 32.7, 17.9.

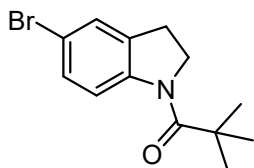

**1-(5-Bromoindolin-1-yl)-2,2-dimethylpropan-1-one (31)**<sup>[13]</sup>. Yellow solid (50.6 mg, 60% yield); <sup>1</sup>H NMR (400 MHz, CDCl<sub>3</sub>)  $\delta$  8.11 (d,  $J$  = 9.2 Hz, 1H), 7.32–7.25 (m, 2H), 4.23 (t,  $J$  = 8.2 Hz, 2H), 3.12 (t,  $J$  = 8.2 Hz, 2H), 1.36 (s, 9H); <sup>13</sup>C NMR (101 MHz, CDCl<sub>3</sub>)  $\delta$  176.8, 144.1, 133.3, 130.3, 127.4, 119.8, 116.0, 49.6, 40.4, 29.2, 27.8.

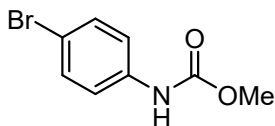

**Methyl (4-bromophenyl)carbamate (32)**<sup>[6]</sup>. Yellow solid (46.6 mg, 68% yield); <sup>1</sup>H NMR (400 MHz, CDCl<sub>3</sub>)  $\delta$  7.42–7.37 (m, 2H), 7.32–7.25 (m, 2H), 6.89 (s, 1H), 3.76 (s, 3H); <sup>13</sup>C NMR (101 MHz, CDCl<sub>3</sub>)  $\delta$  154.1, 137.1, 132.1, 120.4, 116.1, 52.6.

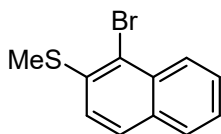

**(1-Bromonaphthalen-2-yl)(methyl)sulfane (33)**<sup>[5]</sup>. White solid (32 mg, 42% yield); <sup>1</sup>H NMR (400 MHz, CDCl<sub>3</sub>)  $\delta$  8.20 (d,  $J$  = 8.6 Hz, 1H), 7.76 (dd,  $J$  = 8.4, 3.3 Hz, 2H), 7.56 (ddd,  $J$  = 8.4, 6.9, 1.2 Hz, 1H), 7.43 (ddd,  $J$  = 8.4, 6.9, 1.2 Hz, 1H), 7.30 (d,  $J$  = 8.6 Hz, 1H), 2.57 (s, 3H); <sup>13</sup>C NMR (101 MHz, CDCl<sub>3</sub>)  $\delta$  137.8, 132.7, 132.0, 128.3, 128.2, 128.1, 126.4, 125.8, 122.9, 120.4, 16.3.

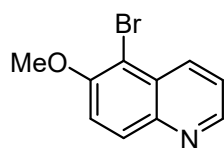

**2-Bromo-6-methoxyquinoline (34)**<sup>[14]</sup>. Yellow solid (55.3 mg, 77% yield); <sup>1</sup>H NMR (400 MHz, CDCl<sub>3</sub>)  $\delta$  8.79 (dd,  $J$  = 4.2, 1.6 Hz, 1H), 8.50 (d,  $J$  = 8.6 Hz, 1H), 8.09 (d,  $J$  = 9.3 Hz, 1H), 7.53–7.41 (m, 2H), 4.04 (s, 3H). <sup>13</sup>C NMR (101 MHz, CDCl<sub>3</sub>)  $\delta$  154.0, 148.8, 144.3, 134.6, 130.4, 128.7, 122.5, 116.5, 107.4, 57.1.

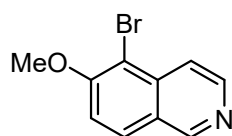

**5-Bromo-6-methoxyisoquinoline (35)**<sup>[15]</sup>. Yellow solid (23.8 mg, 33% yield); <sup>1</sup>H NMR (400 MHz, CDCl<sub>3</sub>)  $\delta$  9.23 (s, 1H), 8.54 (d,  $J$  = 6.1 Hz, 1H), 8.07 (d,  $J$  = 9.0 Hz, 1H), 8.03 (d,  $J$  = 9.0 Hz, 1H), 7.43 (d,  $J$  = 9.0 Hz, 1H), 4.11 (s, 3H); <sup>13</sup>C NMR (101 MHz, CDCl<sub>3</sub>)  $\delta$  158.0, 151.1, 142.2, 137.0, 130.1, 124.8, 119.6, 115.1, 107.1, 57.2.

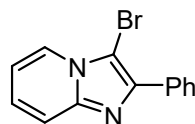

**3-Bromo-2-phenyl-1,8a-dihydroimidazo[1,2-a]pyridine (36)**<sup>[16]</sup>. Yellow oil (37.5 mg, 46% yield); <sup>1</sup>H NMR (400 MHz, CDCl<sub>3</sub>)  $\delta$  8.19–8.11 (m, 3H), 7.64 (d,  $J$  = 9.1 Hz, 1H), 7.51–7.45 (m, 2H), 7.42–7.36 (m, 1H), 7.29–7.24 (m, 1H), 6.92 (t,  $J$  = 6.8 Hz, 1H); <sup>13</sup>C NMR (101 MHz, CDCl<sub>3</sub>)  $\delta$  145.6, 142.8, 133.0, 128.6, 128.5, 128.0, 125.3, 124.1, 117.8, 113.2, 91.9.

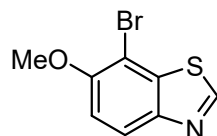

**2-Bromo-6-methoxybenzo[d]thiazole (37)**. Yellow solid (45.7 mg, 62% yield); m.p. = 135.4–136.1 °C; <sup>1</sup>H NMR (400 MHz, CDCl<sub>3</sub>)  $\delta$  8.88 (s, 1H), 8.02 (d,  $J$  = 8.9 Hz, 1H), 7.15 (d,  $J$  = 8.9 Hz, 1H), 4.00 (s, 3H); <sup>13</sup>C NMR (101 MHz, CDCl<sub>3</sub>)  $\delta$  154.3, 152.4, 147.2, 138.9,

122.9, 111.7, 102.4, 57.3; HRMS (ESI) ( $[M+H]^+$ ) Calcd. for  $C_8H_7BrNOS^+$ : 243.9426, Found: 243.9421.

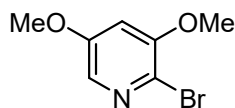

**2-Bromo-3,5-dimethoxybenzimidazole (38)**. Yellow solid (20.0 mg, 31% yield); m.p. = 78.2–79.3 °C;  $^1H$  NMR (400 MHz,  $CDCl_3$ )  $\delta$  7.69 (d,  $J = 2.5$  Hz, 1H), 6.73 (d,  $J = 2.5$  Hz, 1H), 3.90 (s, 3H), 3.87 (s, 3H);  $^{13}C$  NMR (101 MHz,  $CDCl_3$ )  $\delta$  156.8, 153.3, 126.4, 123.2, 107.1, 56.4, 56.3; HRMS (ESI) ( $[M+H]^+$ ) Calcd. for  $C_7H_9BrNO_2^+$ : 217.9811, Found: 217.9807.

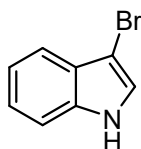

**3-Bromo-1H-indole (39)**<sup>[17]</sup>. Yellow solid (38.6 mg, 66% yield);  $^1H$  NMR (400 MHz,  $CDCl_3$ )  $\delta$  8.13 (s, 1H), 7.59 (d,  $J = 7.6$  Hz, 1H), 7.34 (d,  $J = 7.6$  Hz, 1H), 7.27–7.17 (m, 3H);  $^{13}C$  NMR (101 MHz,  $CDCl_3$ )  $\delta$  135.4, 127.0, 123.5, 123.3, 120.8, 119.3, 111.5, 91.8.

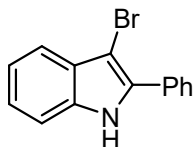

**3-Bromo-2-phenyl-1H-indole (40)**<sup>[9]</sup>. White solid (50.4 mg, 62% yield);  $^1H$  NMR (400 MHz,  $CDCl_3$ )  $\delta$  8.28 (s, 1H), 7.82–7.77 (m, 2H), 7.63–7.59 (m, 1H), 7.51–7.46 (m, 2H), 7.42–7.38 (m, 1H), 7.37–7.34 (m, 1H), 7.27–7.20 (m, 2H);  $^{13}C$  NMR (101 MHz,  $CDCl_3$ )  $\delta$  135.4, 134.4, 131.5, 129.0, 128.6, 127.9, 123.7, 121.1, 119.7, 111.3, 90.2.

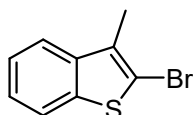

**2-Bromo-3-methylbenzo[b]thiophene (41)**<sup>[9]</sup>. Colorless oil (50.8 mg, 75% yield);  $^1H$  NMR (400 MHz,  $CDCl_3$ )  $\delta$  7.68 (d,  $J = 6.8$  Hz, 1H), 7.59 (d,  $J = 6.8$  Hz, 1H), 7.36–7.25 (m, 2H),



2.34 (s, 3H);  $^{13}\text{C}$  NMR (101 MHz,  $\text{CDCl}_3$ )  $\delta$  139.7, 139.0, 131.9, 124.7, 124.6, 121.9, 121.8, 112.6, 13.3.

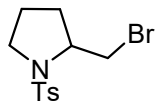

**2-(Bromomethyl)-1-tosylpyrrolidine (42)**<sup>[18]</sup>. Yellow oil (60.0 mg, 63% yield);  $^1\text{H}$  NMR (400 MHz,  $\text{CDCl}_3$ )  $\delta$  7.73 (d,  $J = 8.0$  Hz, 2H), 7.34 (d,  $J = 8.0$  Hz, 2H), 3.86–3.74 (m, 2H), 3.51–3.44 (m, 1H), 3.36 (t,  $J = 9.7$  Hz, 1H), 3.18–3.13 (m, 1H), 2.44 (s, 3H), 1.98–1.80 (m, 2H), 1.76–1.71 (m, 1H), 1.60–1.51 (m, 1H);  $^{13}\text{C}$  NMR (101 MHz,  $\text{CDCl}_3$ )  $\delta$  144.0, 134.1, 130.0, 127.7, 60.5, 50.0, 36.2, 30.4, 23.9, 21.7.

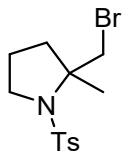

**2-(Bromomethyl)-2-methyl-1-tosylpyrrolidine (43)**<sup>[18]</sup>. Yellow oil (51.1 mg, 51% yield);  $^1\text{H}$  NMR (400 MHz,  $\text{CDCl}_3$ )  $\delta$  7.76 (d,  $J = 8.1$  Hz, 2H), 7.29 (d,  $J = 8.1$  Hz, 2H), 3.86 (d,  $J = 10.1$  Hz, 1H), 3.76 (d,  $J = 10.1$  Hz, 1H), 3.47–3.40 (m, 1H), 3.39–3.31 (m, 1H), 2.42 (s, 3H), 2.32–2.26 (m, 1H), 1.92–1.62 (m, 4H), 1.57 (s, 3H);  $^{13}\text{C}$  NMR (101 MHz,  $\text{CDCl}_3$ )  $\delta$  143.3, 137.9, 129.6, 127.4, 67.5, 50.0, 41.2, 39.4, 24.2, 22.6, 21.6.

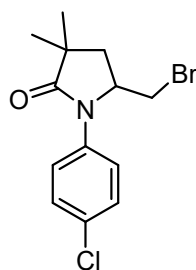

**5-(Bromomethyl)-1-(4-chlorophenyl)-3,3-dimethylpyrrolidin-2-one (44)**. Yellow oil (52.9 mg, 56% yield);  $^1\text{H}$  NMR (400 MHz,  $\text{CDCl}_3$ )  $\delta$  7.26–7.20 (m, 2H), 7.05–6.97 (m, 2H), 4.63–4.56 (m, 1H), 3.53–3.48 (m, 2H), 2.20 (dd,  $J = 12.7, 6.0$  Hz, 1H), 1.94 (dd,  $J = 12.7, 9.7$  Hz, 1H), 1.39 (s, 3H), 1.35 (s, 3H);  $^{13}\text{C}$  NMR (101 MHz,  $\text{CDCl}_3$ )  $\delta$  168.0, 145.6, 128.8, 128.7, 124.3, 42.7, 41.7, 34.3, 27.0, 26.3; HRMS (ESI) ( $[\text{M}+\text{H}]^+$ ) Calcd. For  $\text{C}_{13}\text{H}_{16}\text{BrNO}^+$ : 316.0098, Found: 316.0096.

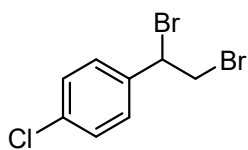

**1-Chloro-4-(1,2-dibromoethyl)benzene (45)**<sup>[6]</sup>. Yellow oil (30.0 mg, 34% yield); <sup>1</sup>H NMR (400 MHz, CDCl<sub>3</sub>) δ 7.39–7.31 (m, 4H), 5.10 (dd, *J* = 10.7, 5.1 Hz, 1H), 4.06 (dd, *J* = 10.7, 5.1 Hz, 1H), 3.97 (t, *J* = 10.7 Hz, 1H); <sup>13</sup>C NMR (101 MHz, CDCl<sub>3</sub>) δ 137.3, 135.1, 129.3, 129.2, 49.7, 34.8.

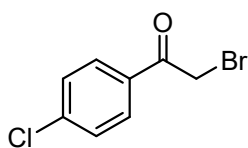

**2-Bromo-1-(4-chlorophenyl)ethan-1-one (46)**<sup>[6]</sup>. Yellow oil (14.6 mg, 21% yield); <sup>1</sup>H NMR (400 MHz, CDCl<sub>3</sub>) δ 7.94 (d, *J* = 8.6 Hz, 2H), 7.48 (d, *J* = 8.6 Hz, 2H), 4.42 (s, 2H); <sup>13</sup>C NMR (101 MHz, CDCl<sub>3</sub>) δ 190.4, 140.7, 132.4, 130.6, 129.4, 30.6.

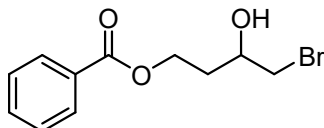

**4-Bromo-3-hydroxybutyl benzoate (47)**. Yellow oil (28.5 mg, 35% yield); <sup>1</sup>H NMR (400 MHz, CDCl<sub>3</sub>) δ 8.11–8.07 (m, 2H), 7.65–7.56 (m, 1H), 7.50–7.45 (m, 2H), 5.50–5.44 (m, 1H), 3.80–3.62 (m, 4H), 2.11–1.97 (m, 2H); <sup>13</sup>C NMR (101 MHz, CDCl<sub>3</sub>) δ 166.8, 133.7, 130.1, 129.6, 128.7, 70.7, 58.5, 36.1, 34.9; HRMS (ESI) ([M+H]<sup>+</sup>) Calcd. for C<sub>11</sub>H<sub>14</sub>BrO<sub>3</sub><sup>+</sup>: 273.0121, Found: 273.0120.

## References

1. A. Fuchs, R. Baur, C. Schoeder, E. Sigel, C. E. Müller, *Bioorg. Med. Chem.*, 2014, **22**, 6908–6917.
2. S. Andjouh, C. Bressy Y. Blache, *RSC Adv.*, 2016, **6**, 14496–14504.

3. A. Podgoršek, S. Stavber, M. Zupanab, J. Iskra, *Green Chem.*, 2007, **9**, 1212–1218.
4. B. Anjaiah, M. S. Kumar, P. Srinivas, K. C. Rajanna, *Inc. Int J Chem Kinet.*, 2016, **48**, 98–105.
5. Y. Shi, Z. Ke, *Green Chem.*, 2018, **20**, 4448–4452.
6. Y. Nishio, K. Yubata, Y. Wakai, K. Notsu, K. Yamamoto, H. Fujiwara, H. Matsubara, *Tetrahedron*, 2019, **75**, 1398–1405.
7. K.M. McCauley, J.M. Vrtis, J. Dupont, *J. Am. Chem. Soc.*, 2000, **122**, 2403–2404.
8. R. C.Samanta, H.Yamamoto, *Chem. Eur. J.*, 2015, **21**, 11976–11979.
9. S. Song, X. Sun, X.-W. Li, Y. Yuan, N. Jiao, *Org. Lett.*, 2015, **17**, 2886–2889.
10. Y. Gu, H. Wei, L. Chen, Y. Shen, *Chin. J. Org. Chem.*, 2012, **32**, 174–177.
11. Z. Ruan, M. Wang, C. Yang, L. Zhu, Z. Su, R. Hong, *Jacs. Au.*, 2022, **2**, 793–800.
12. B. Huang, Y. Zhao, C. Yang, Y. Gao, W. Xia, *Org. Lett.*, 2017, **19**, 3799–3802.
13. S. S. Gupta, Manisha, R. Kumar, A. K. Dhimana, U. Sharma, *Org. Biomol. Chem.*, 2021, **19**, 9675–9687.
14. S. I. Baker, M. Yaghoubi, S. L. Bidwell, S. L. Pierce, H. P. Hratchian, R. D. Baxte, *J. Org. Chem.*, 2022, **87**, 8492–8502.
15. P. Chen, D. N. Kristin, D. William, *Bio. & Med. Chem. Lett.*, 2003, **13**, 1345–1348.
16. R. K. Yadav, R. Sharma, D. Gautam, P. J. Joshi, S. Chaudhary, *J. Org. Chem.*, 2021, **10**, 1726–1741.
17. A. H. Sandtorva, H. R Bjørsvik, *Adv. Synth. Catal.*, 2013, **355**, 499–507.
18. K. Moriyama, Y. Izumisawa, H. Togo, *J. Org. Chem.*, 2011, **76**, 7249–7255.

## 7. NMR Spectra for Products

### Compound 3

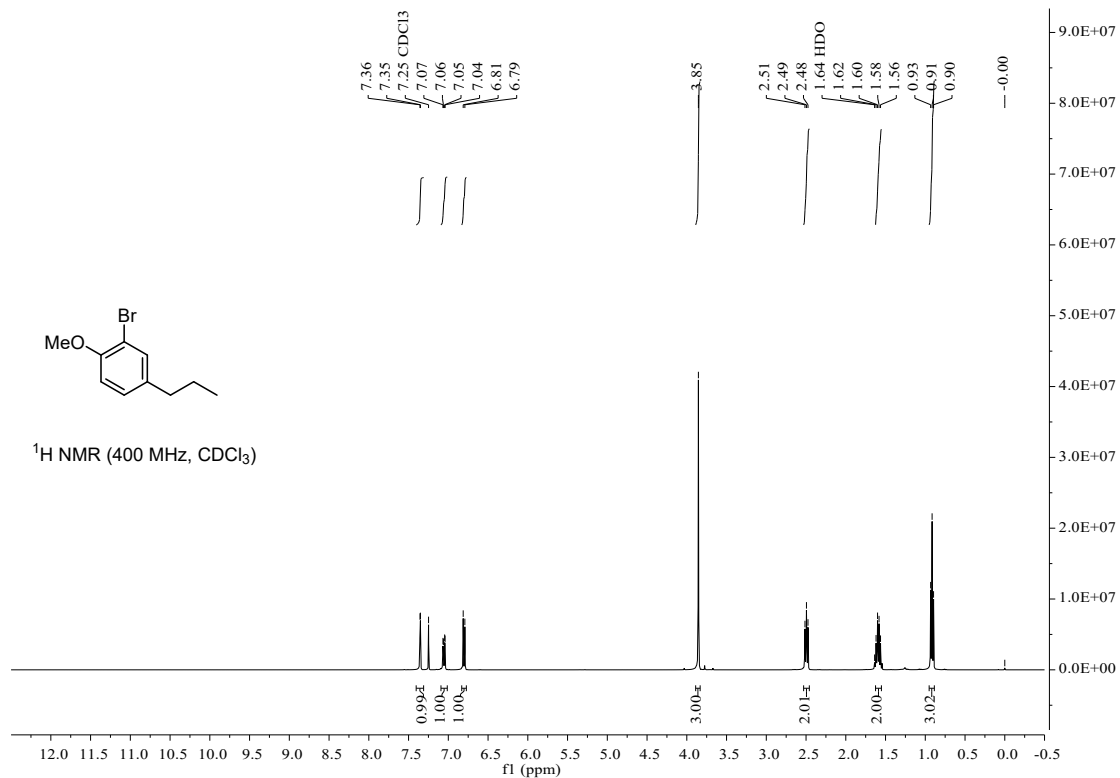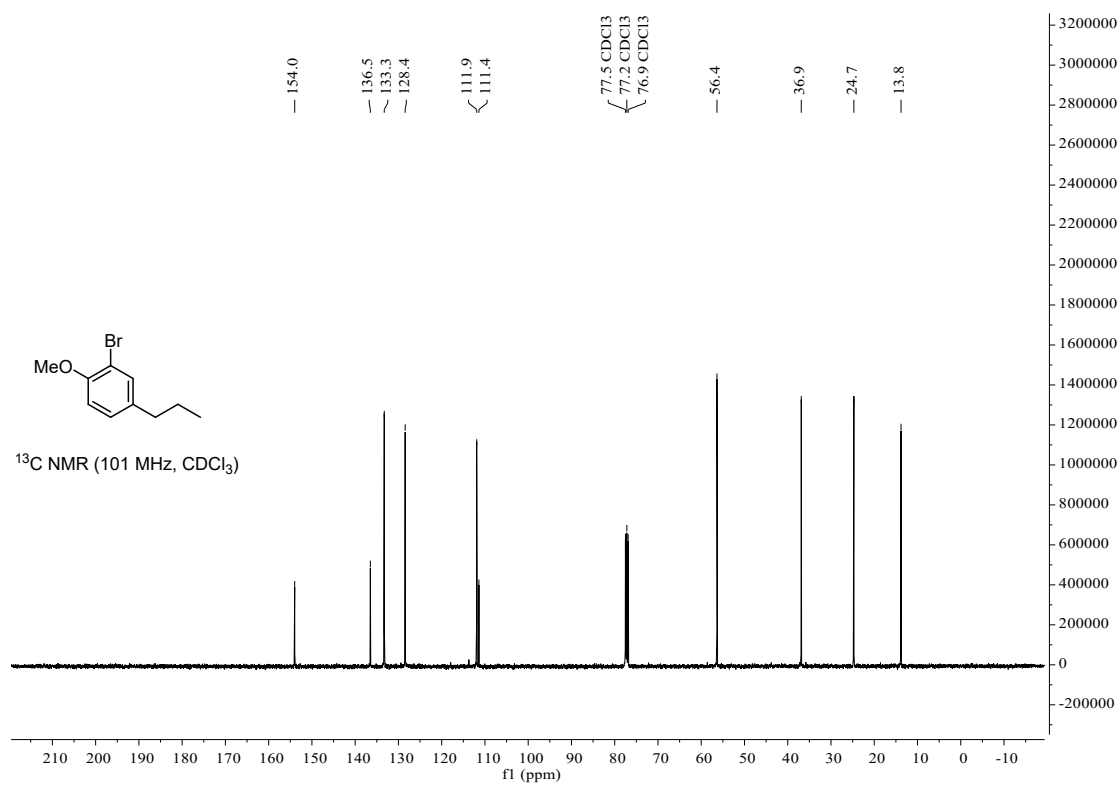

### Compound 4

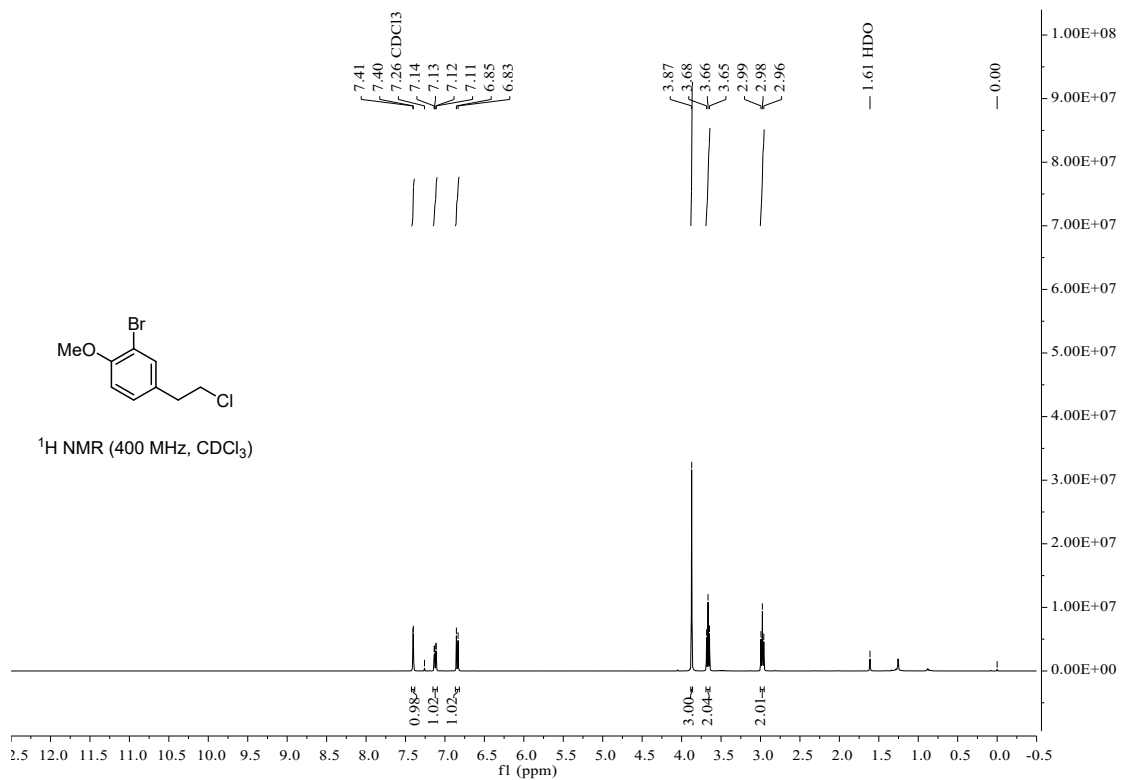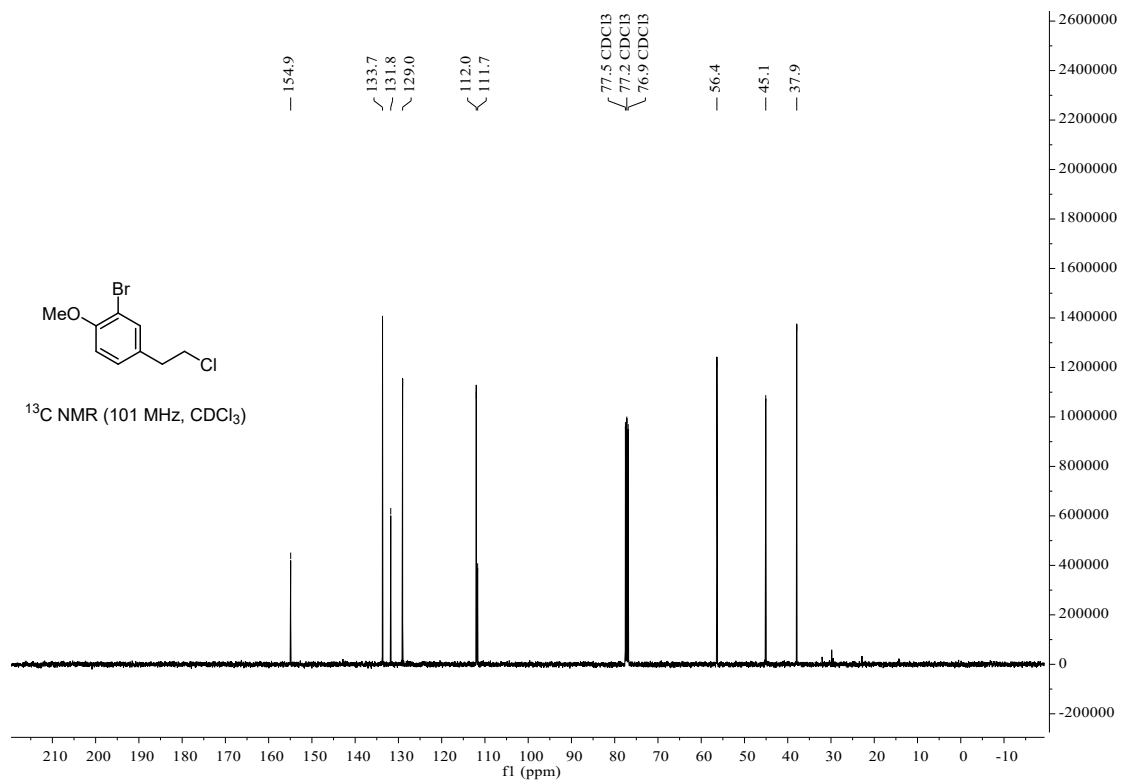

## Compound 5

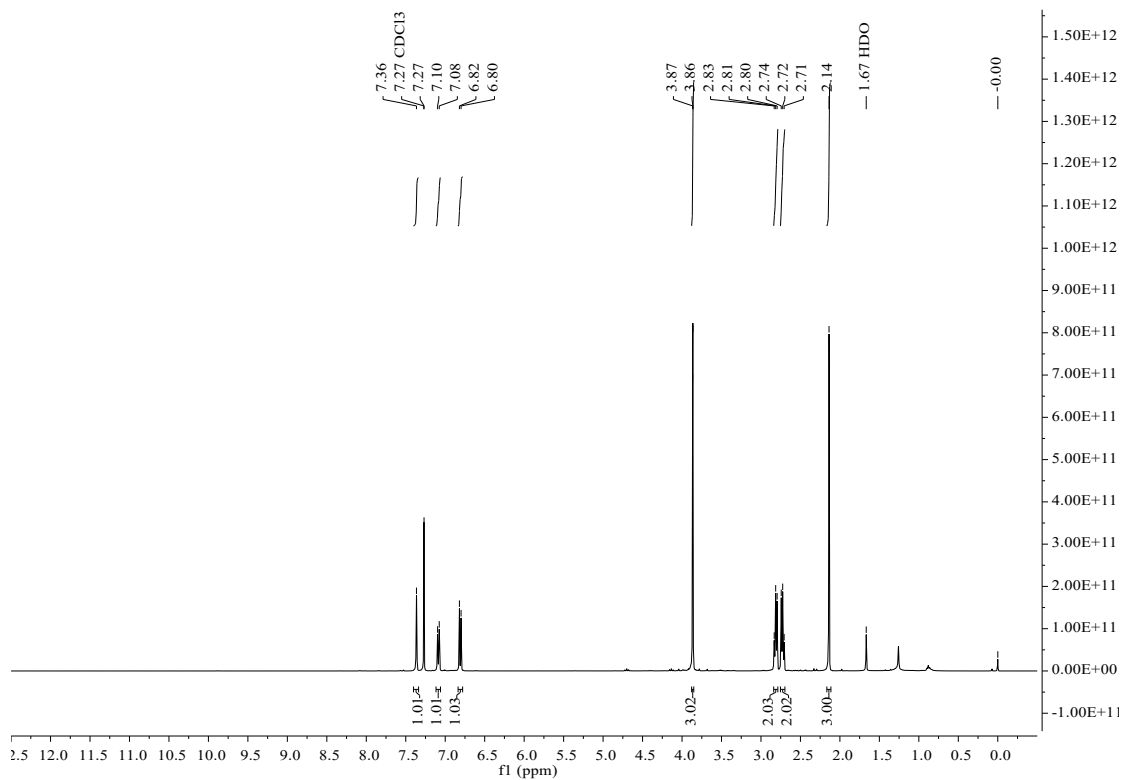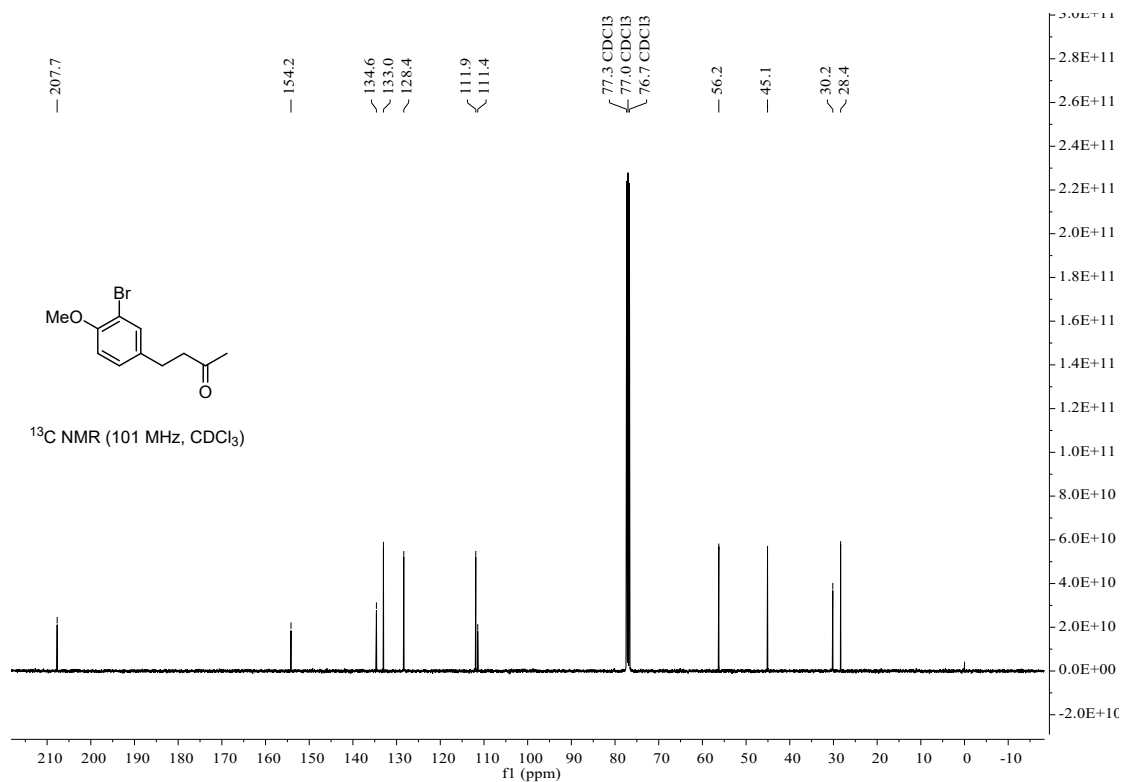

**Compound 6**

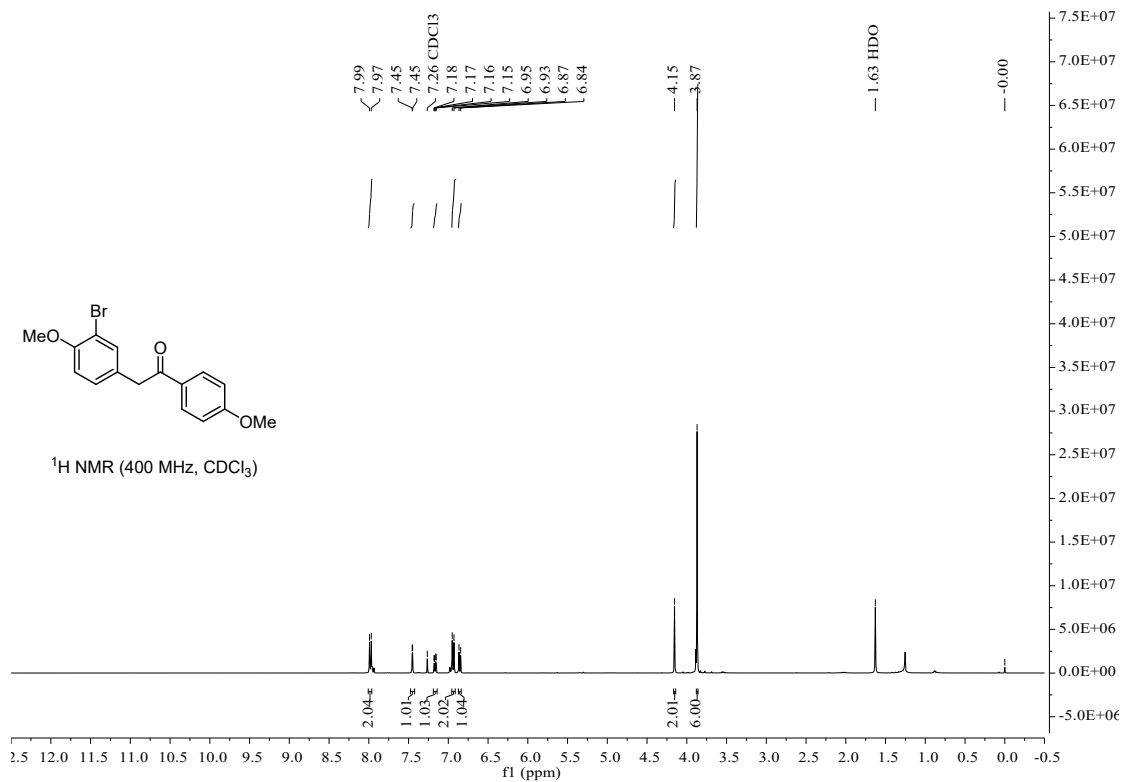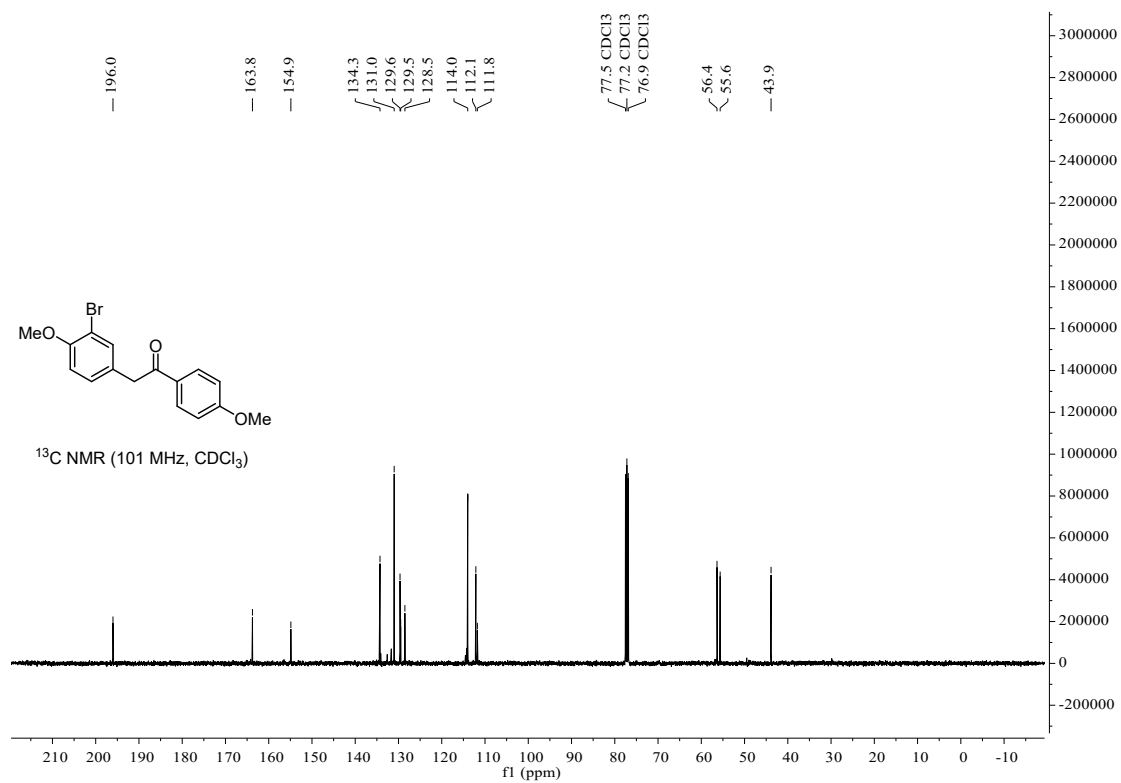

## Compound 7

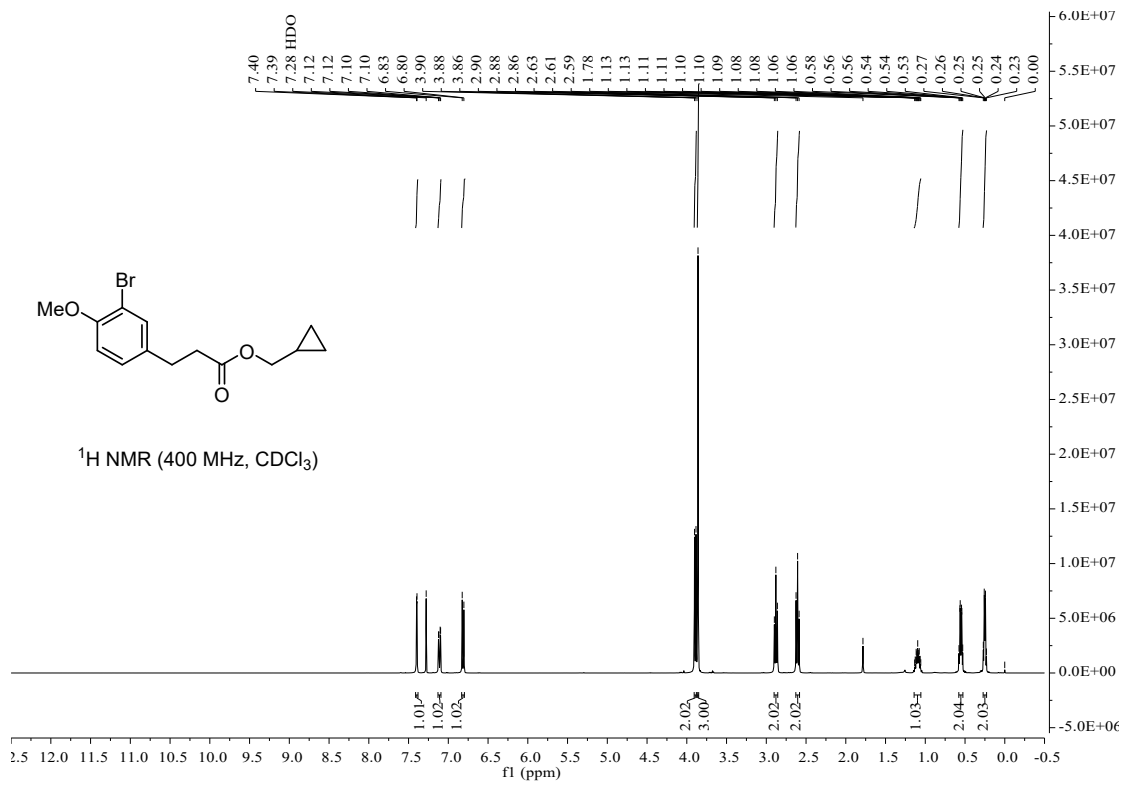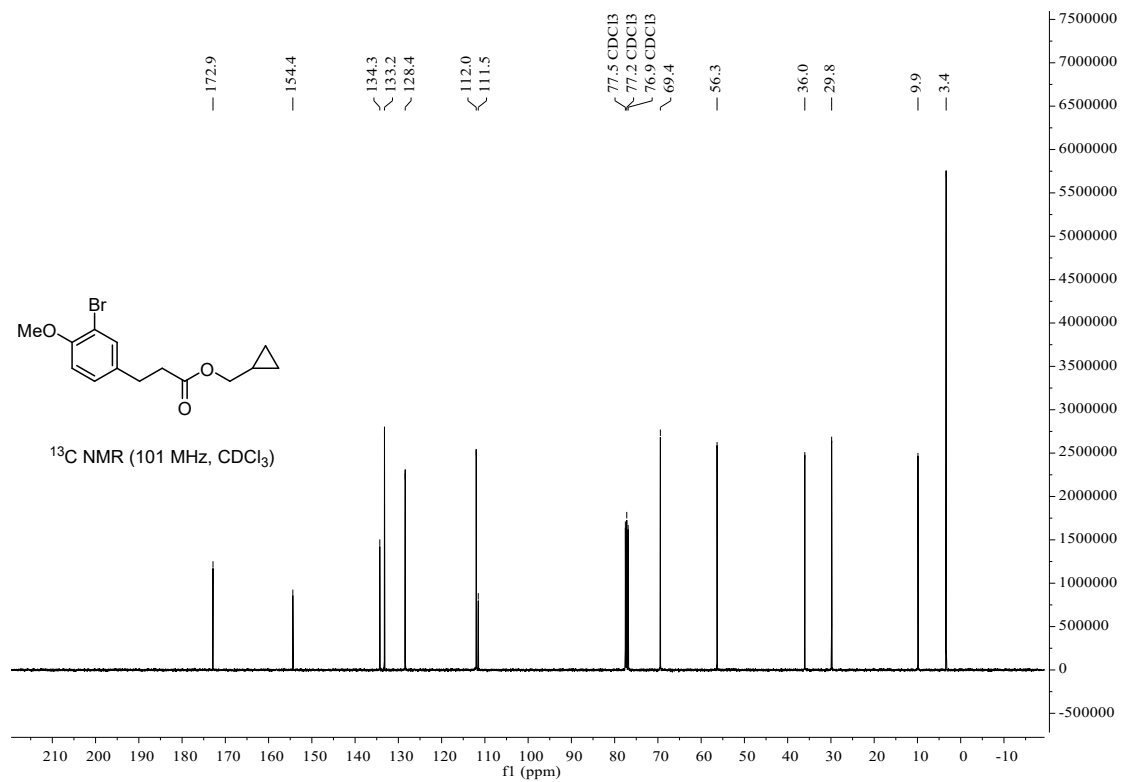

**Compound 8**



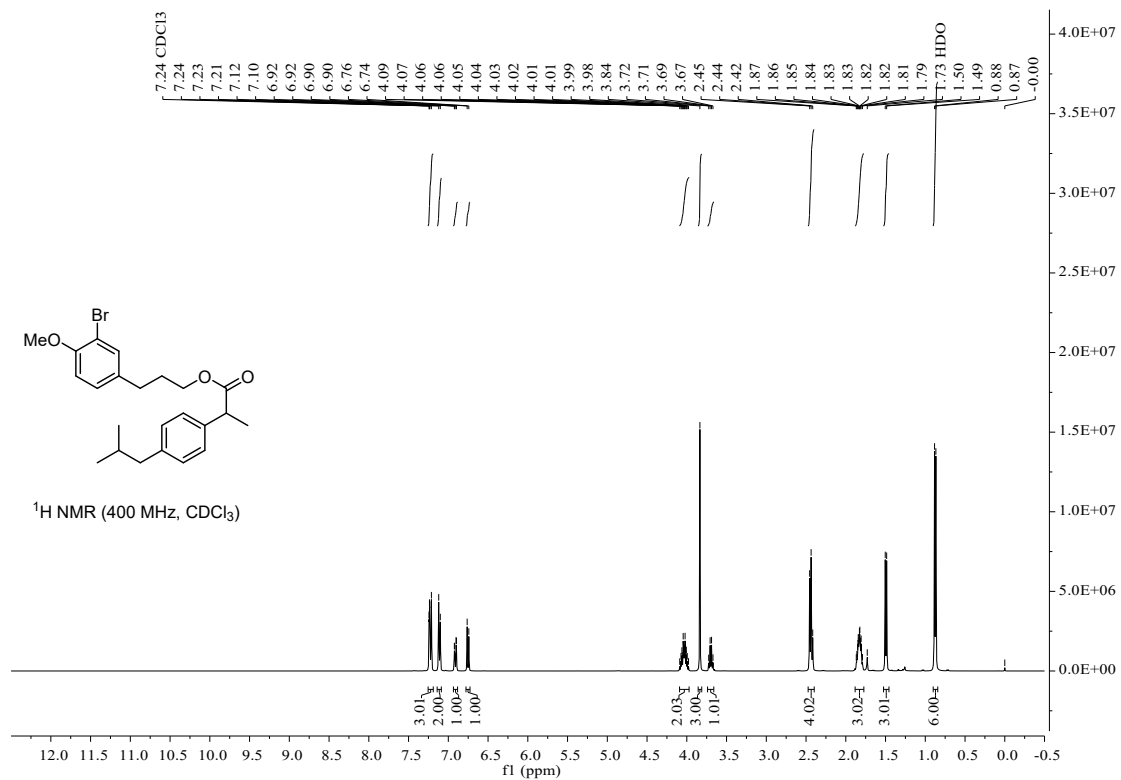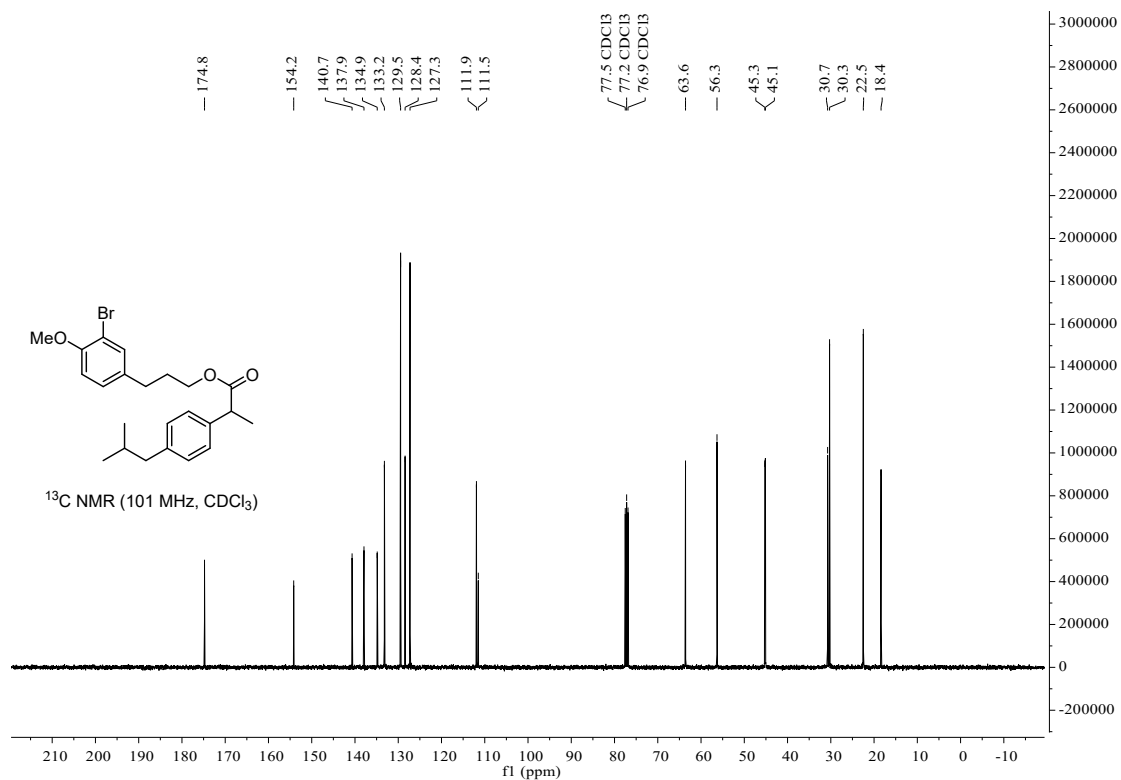

**Compound 9**

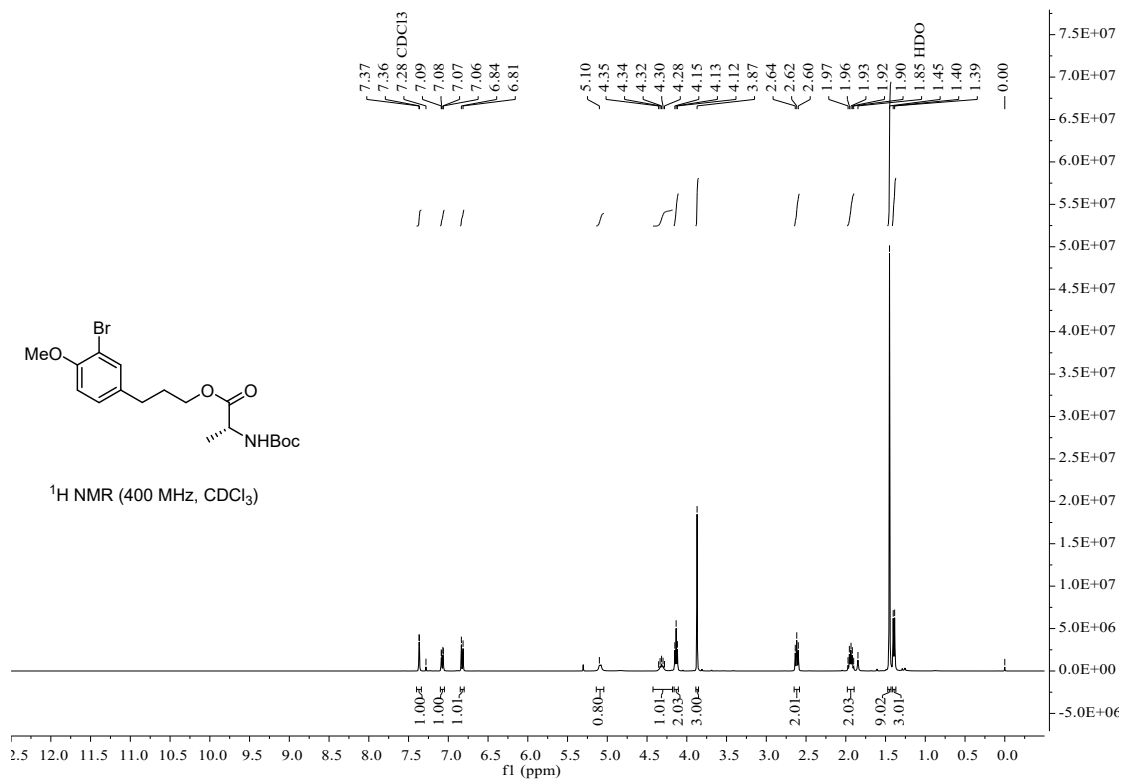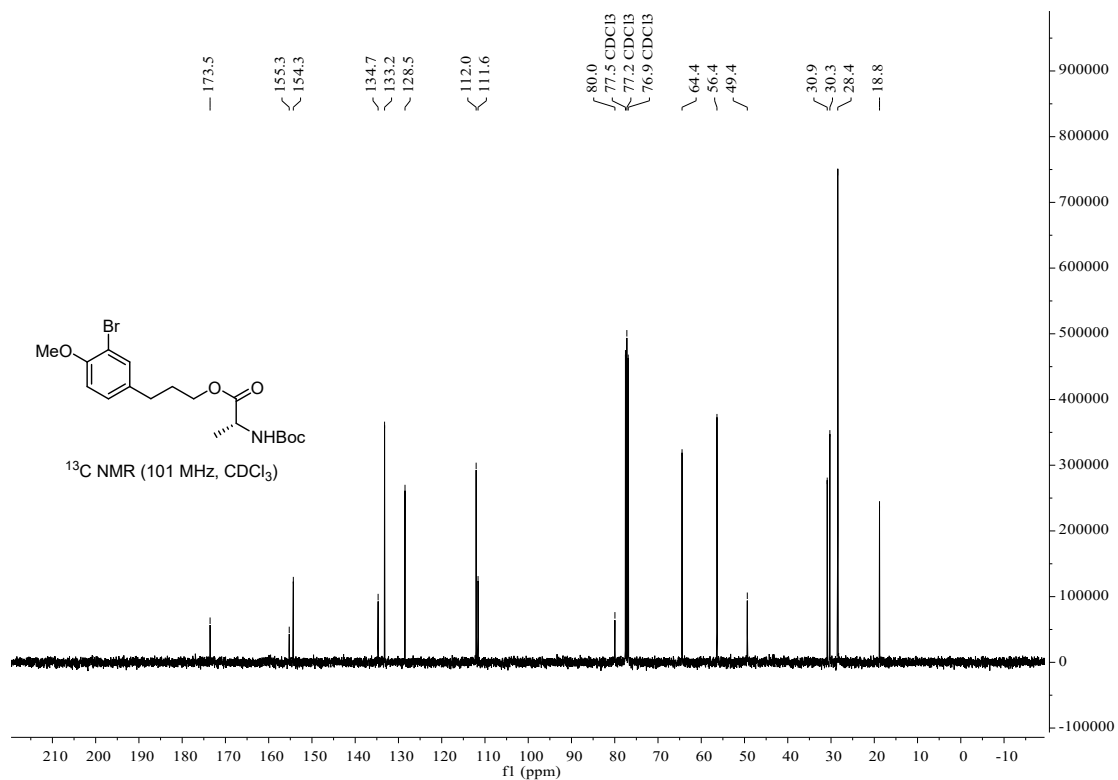

**Compound 10**

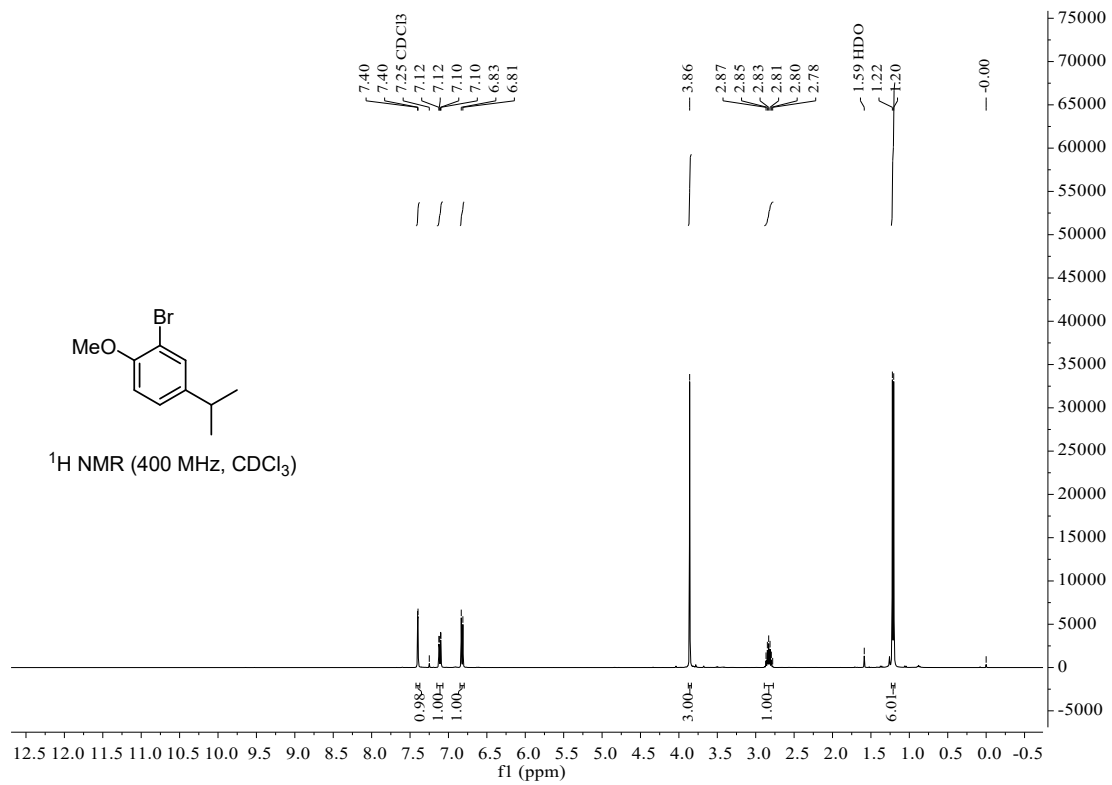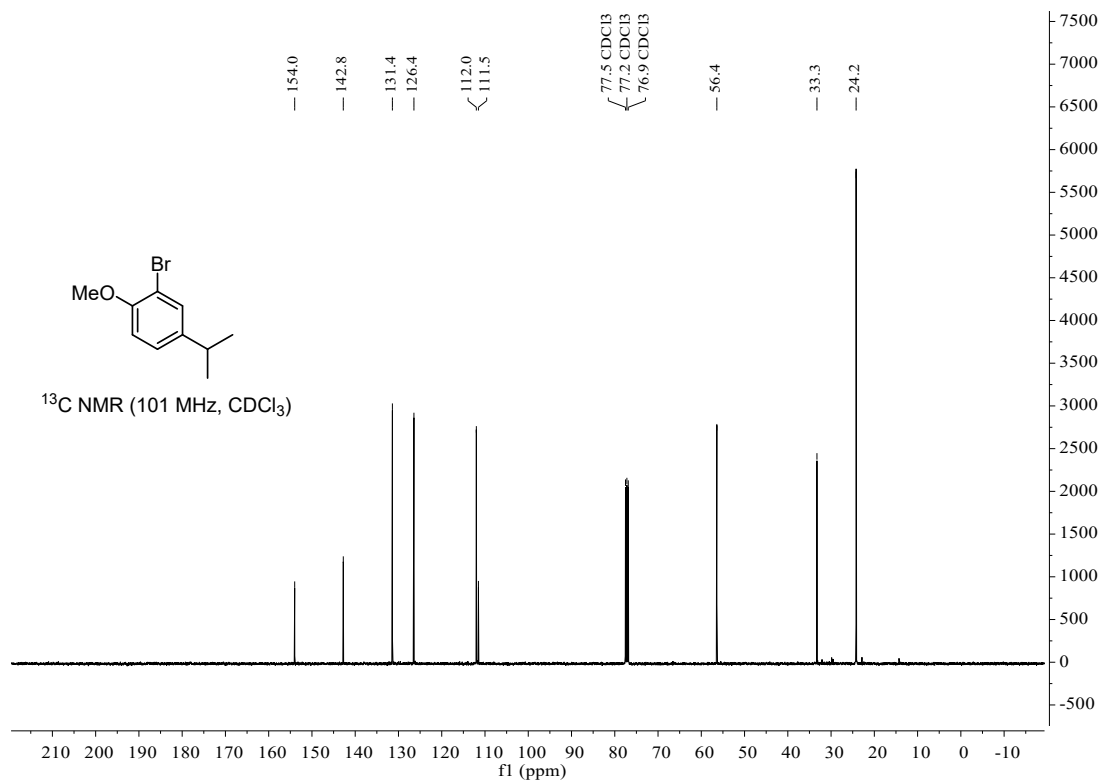

**Compound 11**

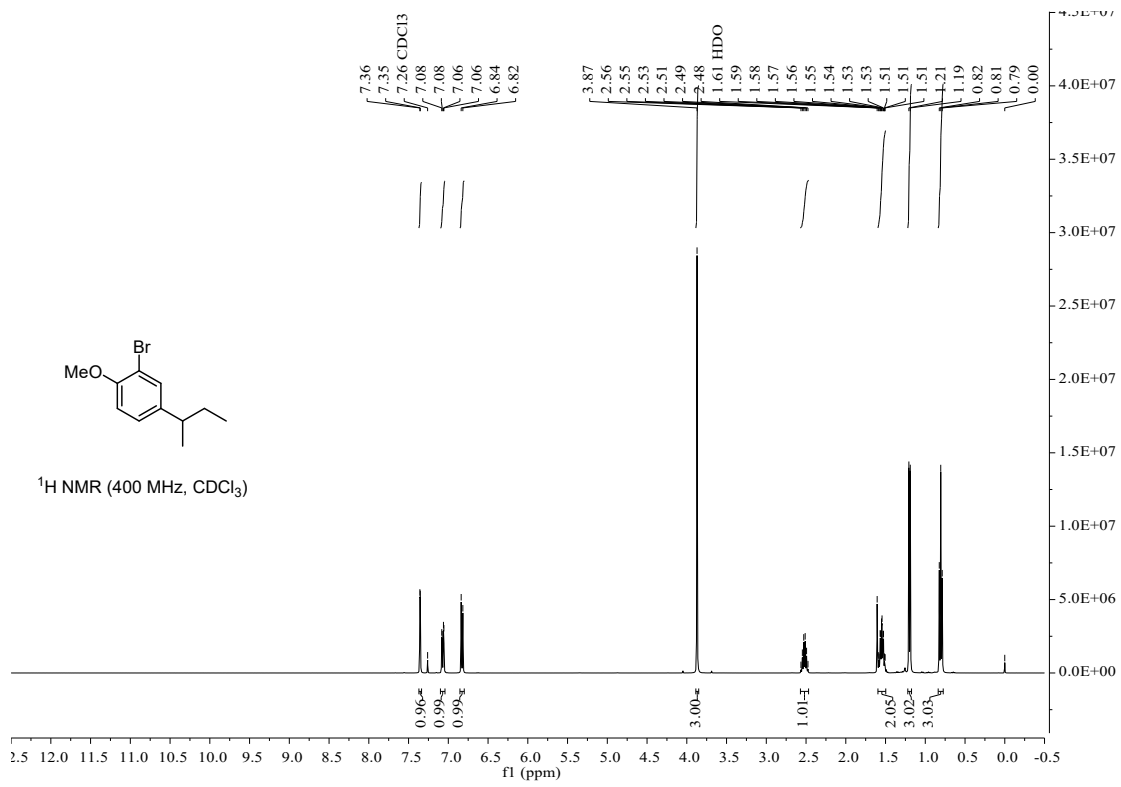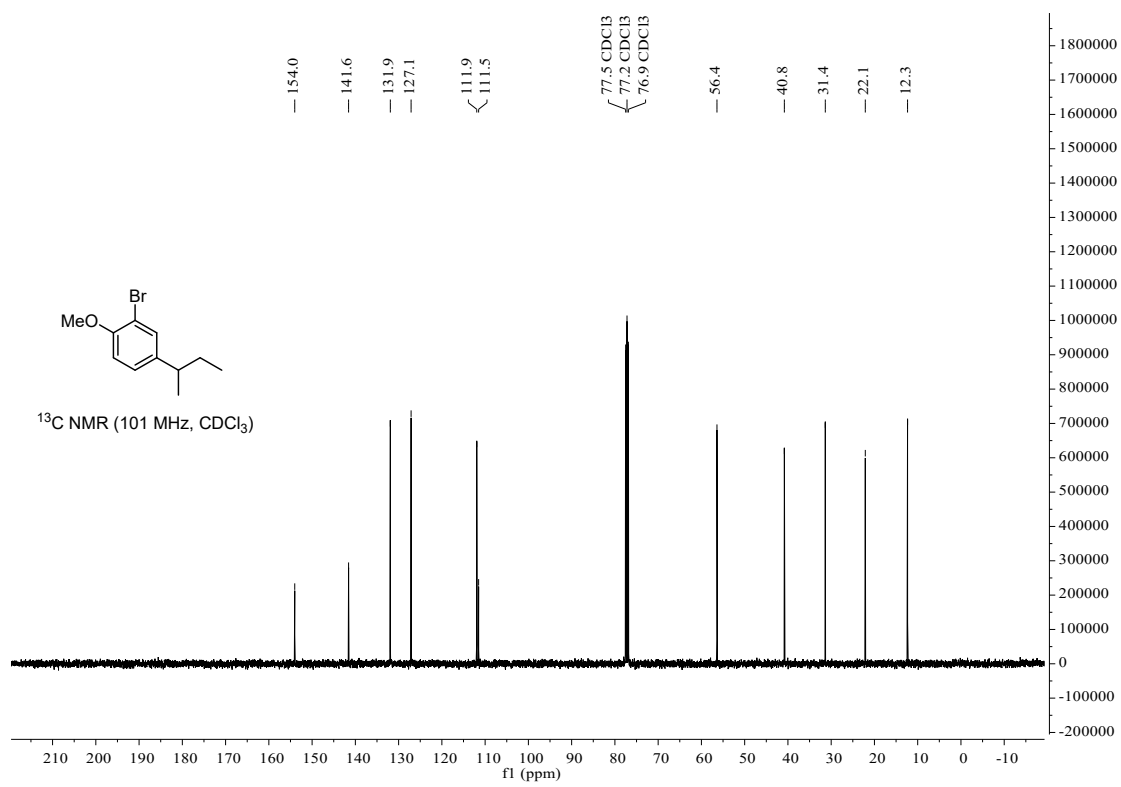

**Compound 12**

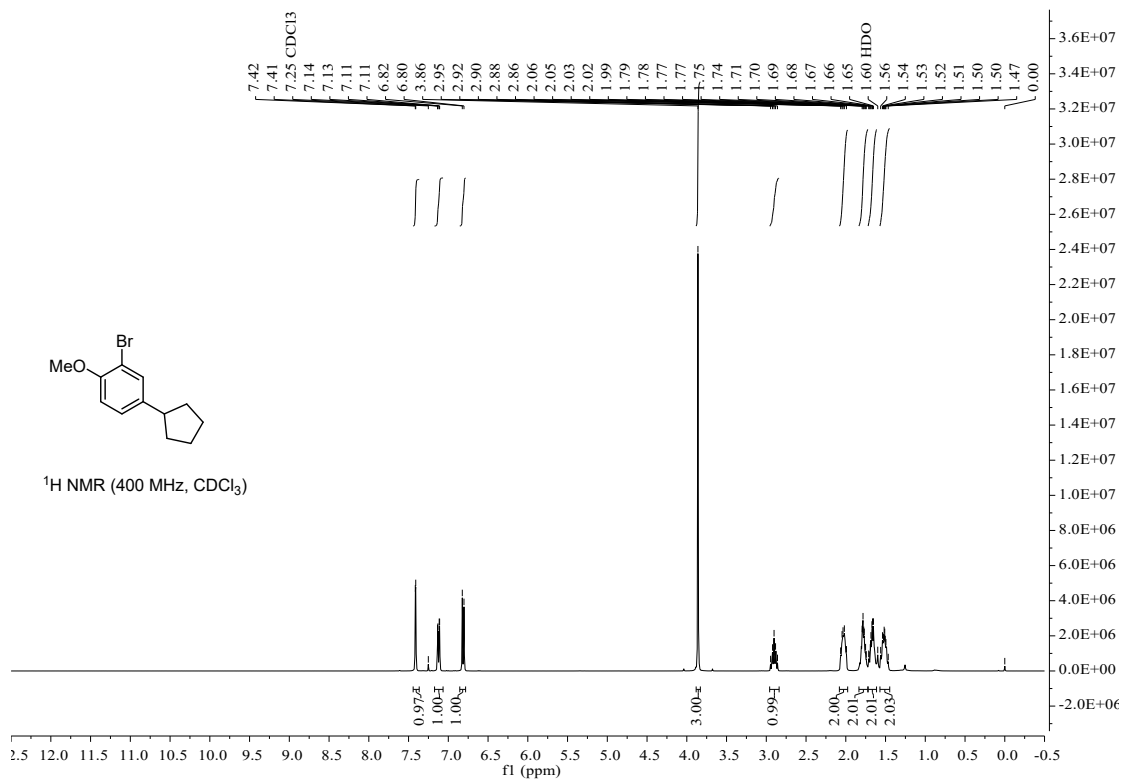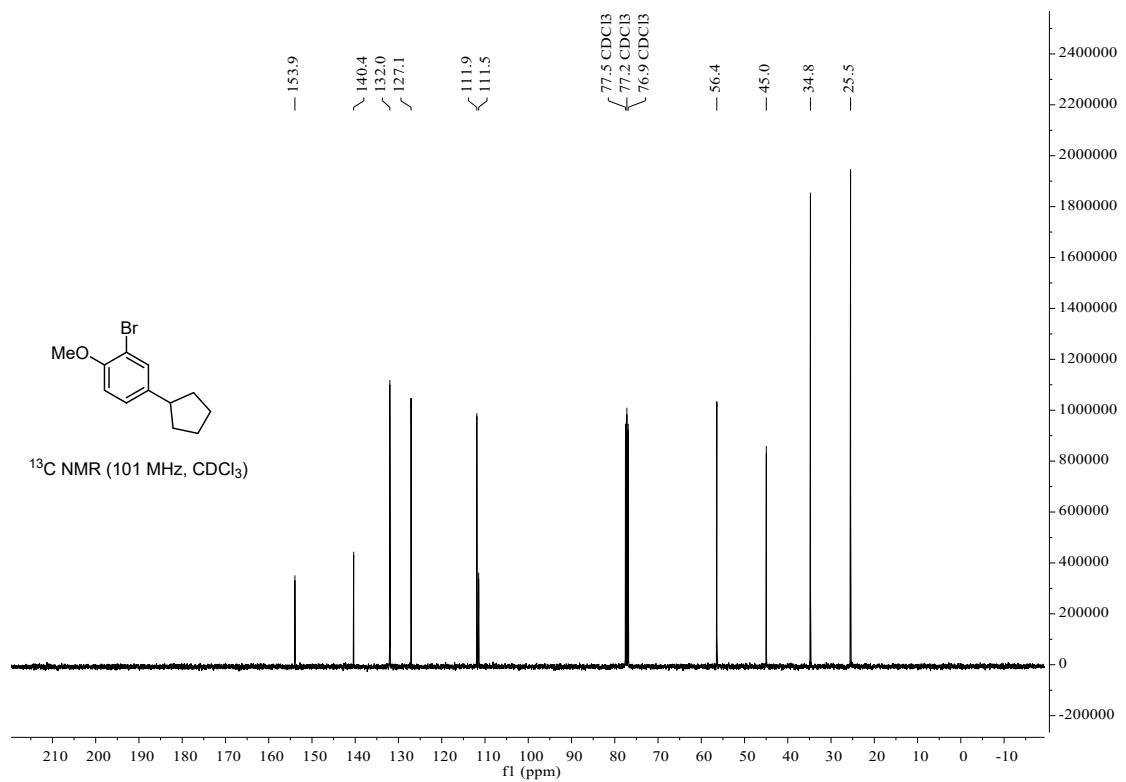

**Compound 13**

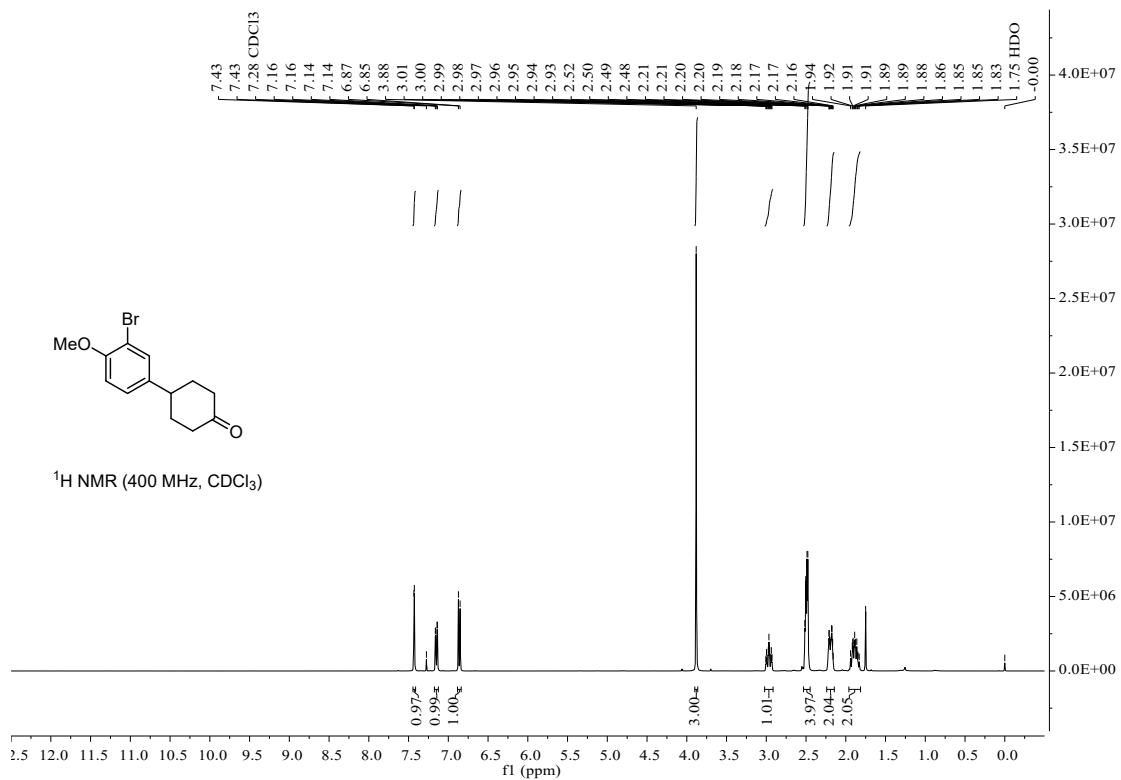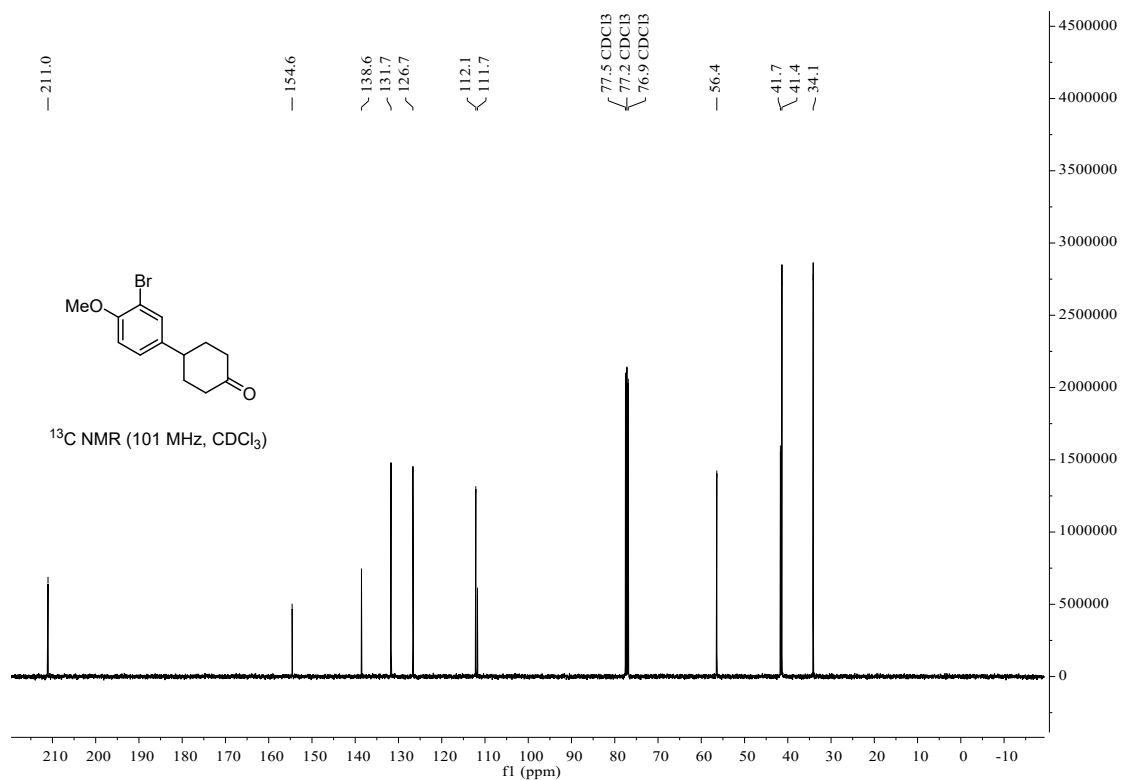

**Compound 14**

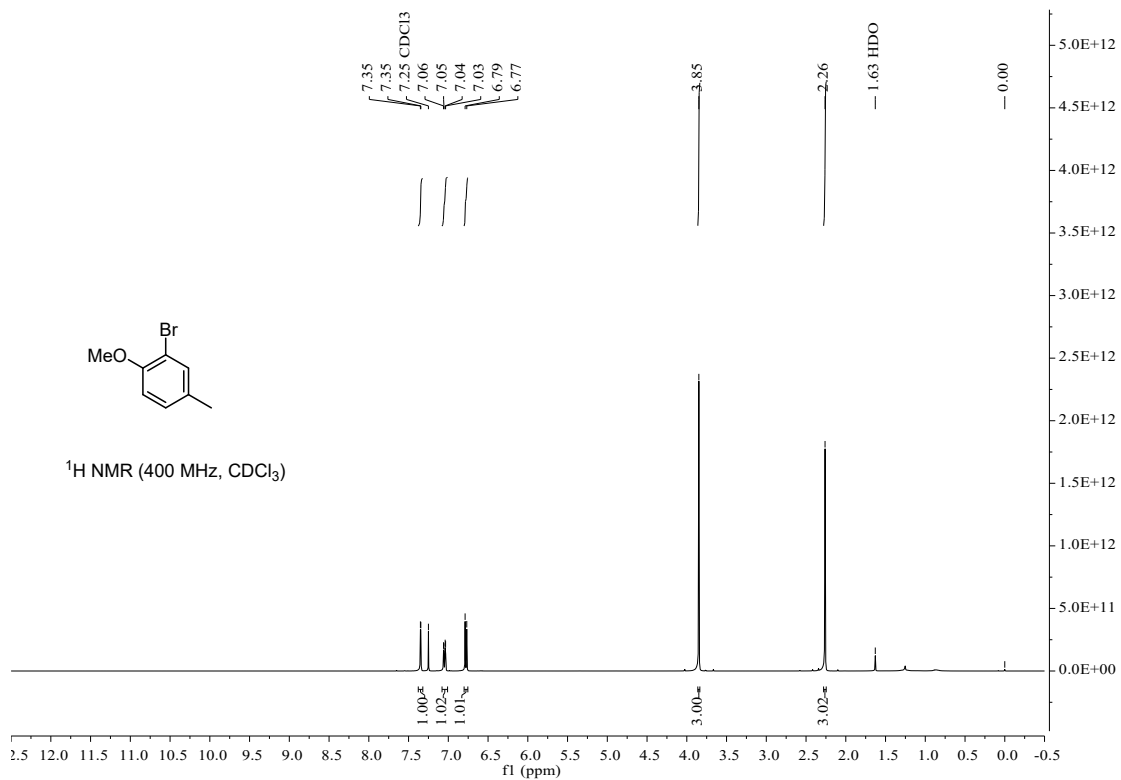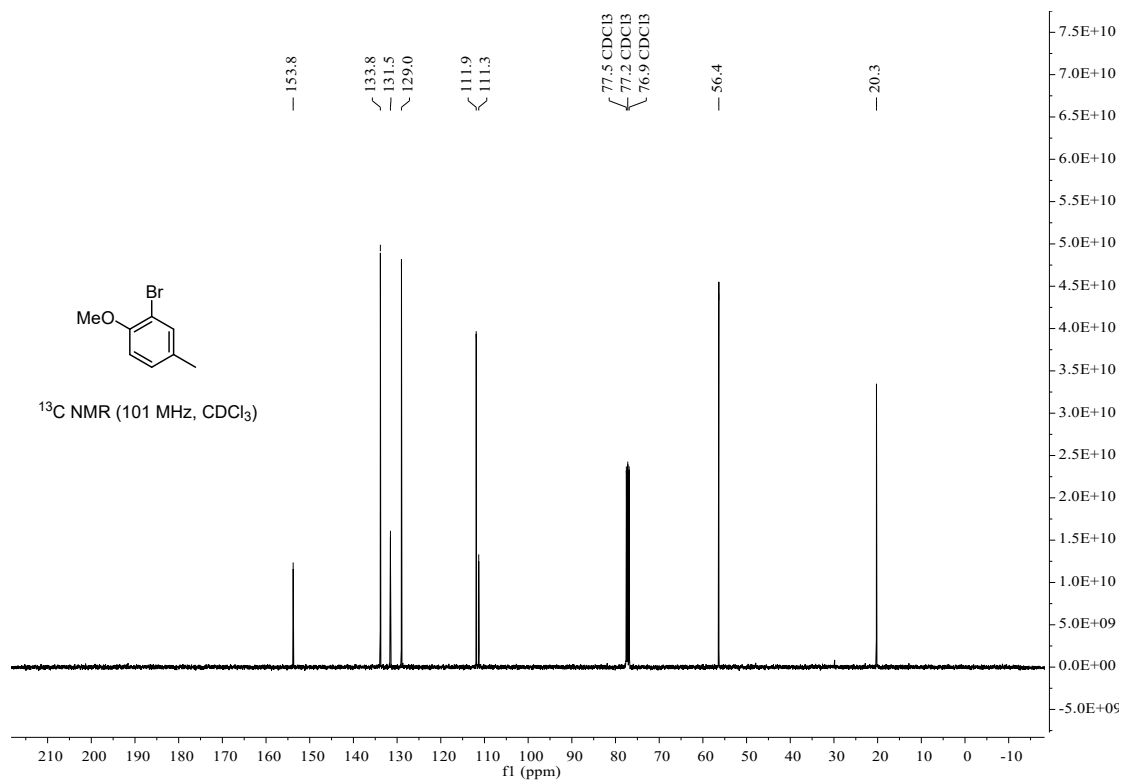

**Compound 15**

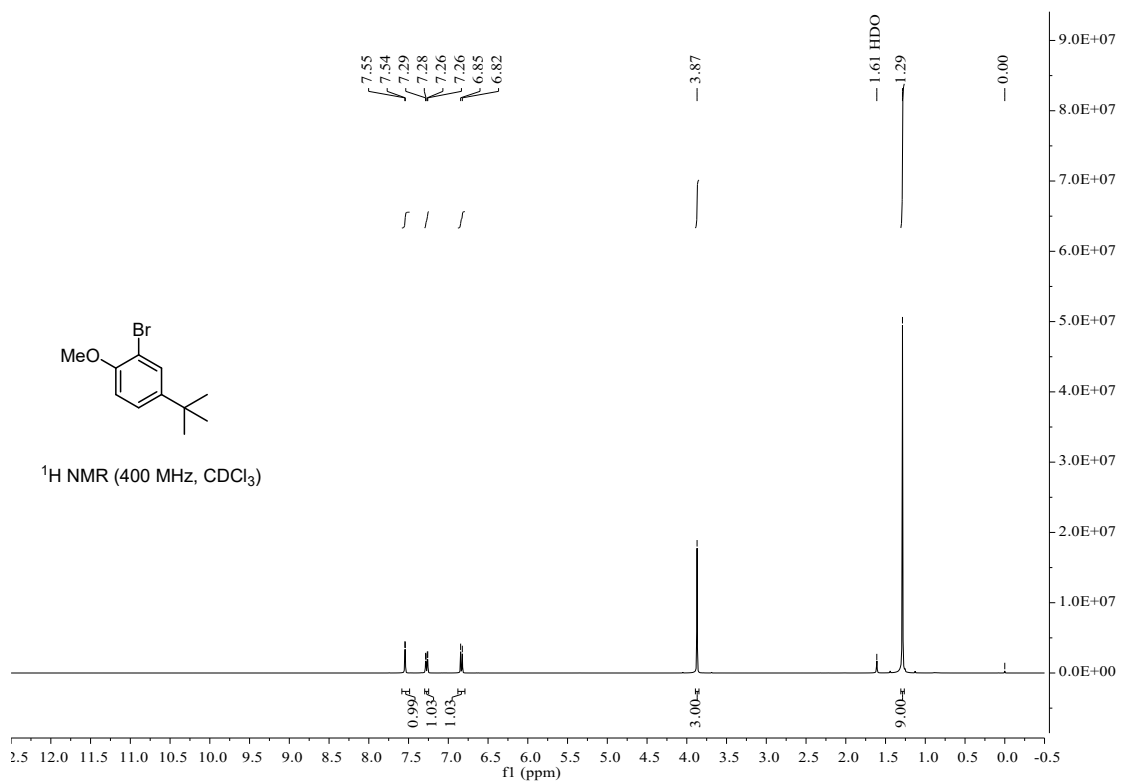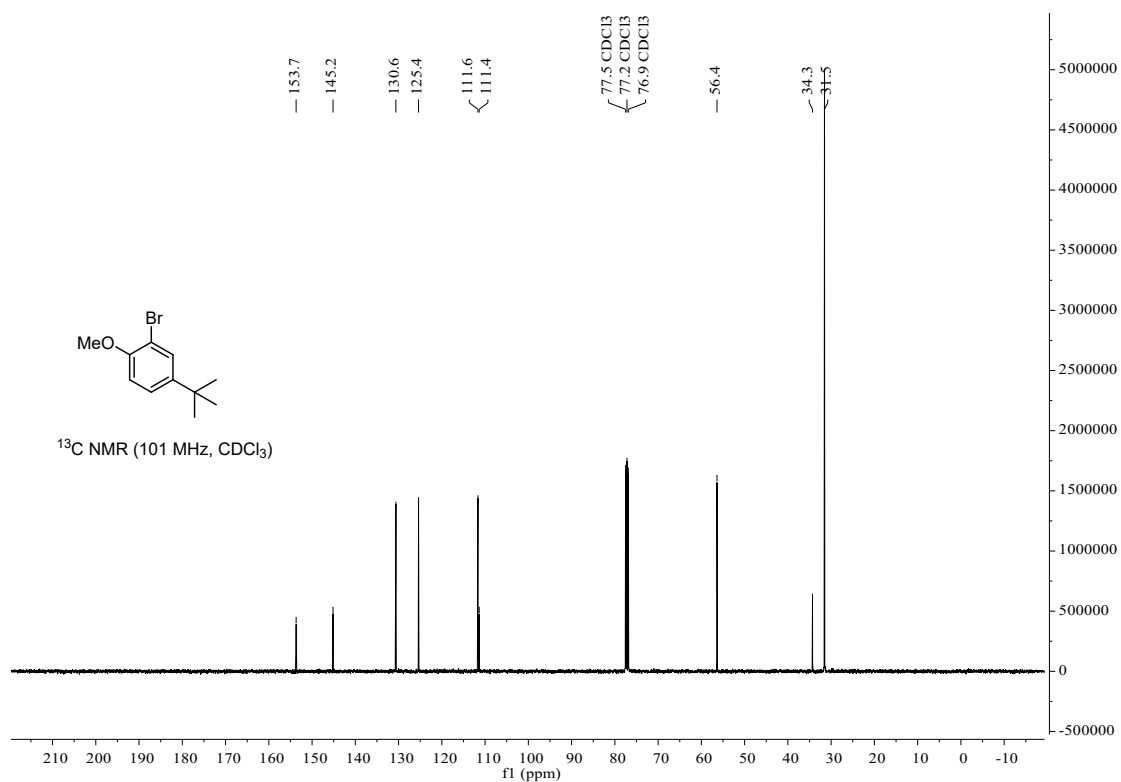

**Compound 16**



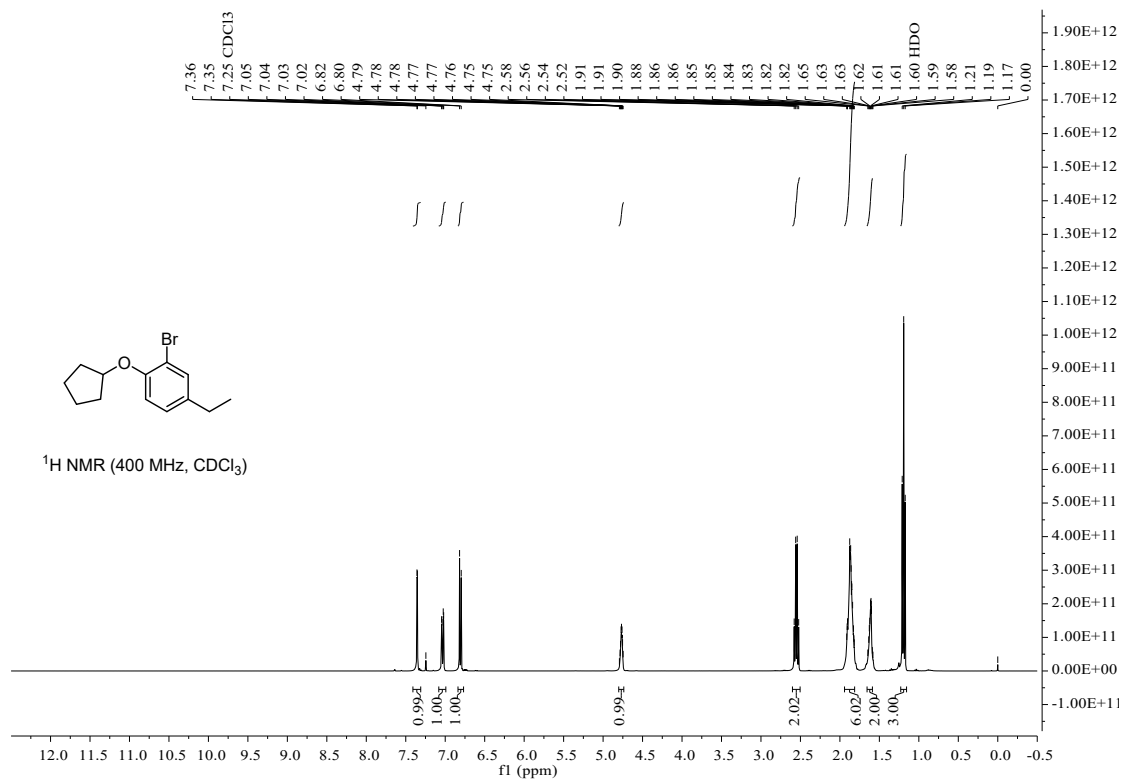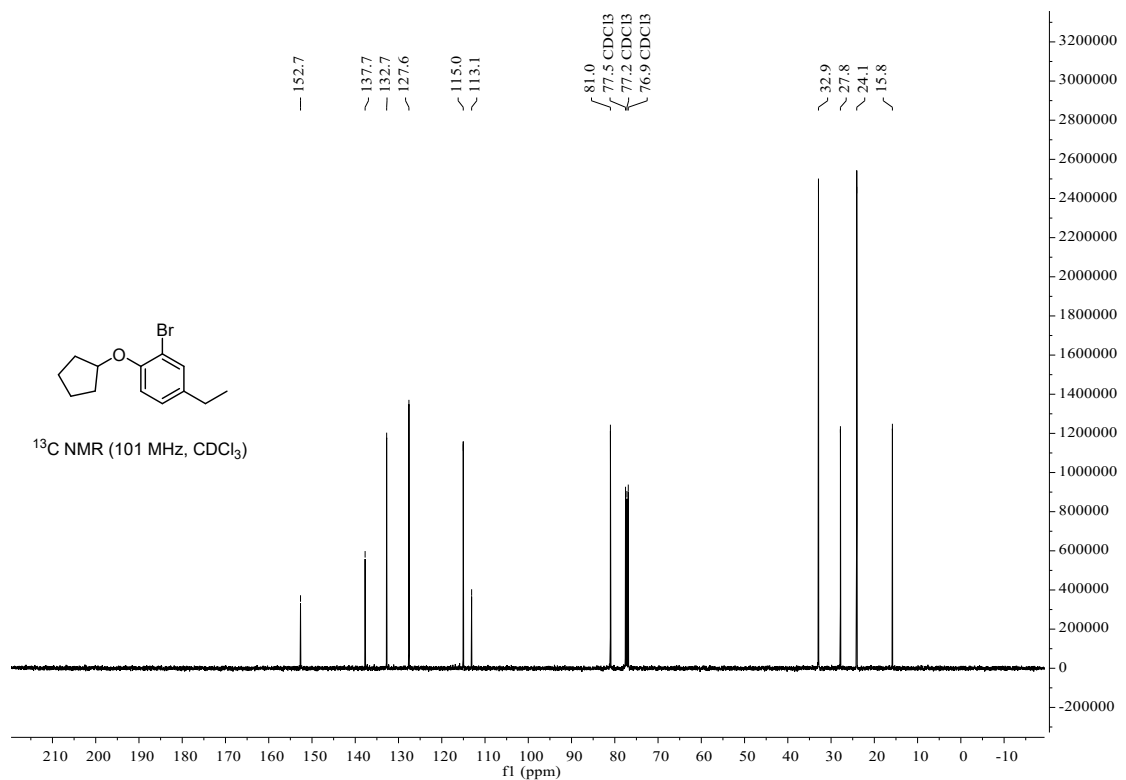

**Compound 17**

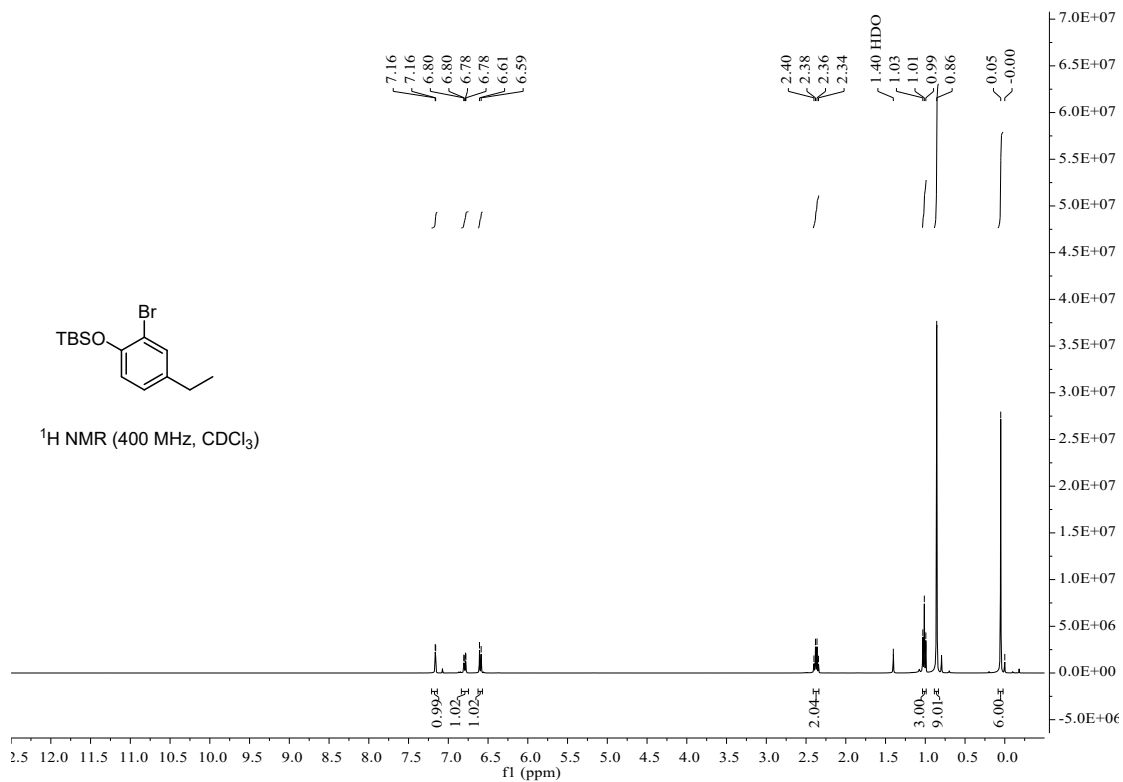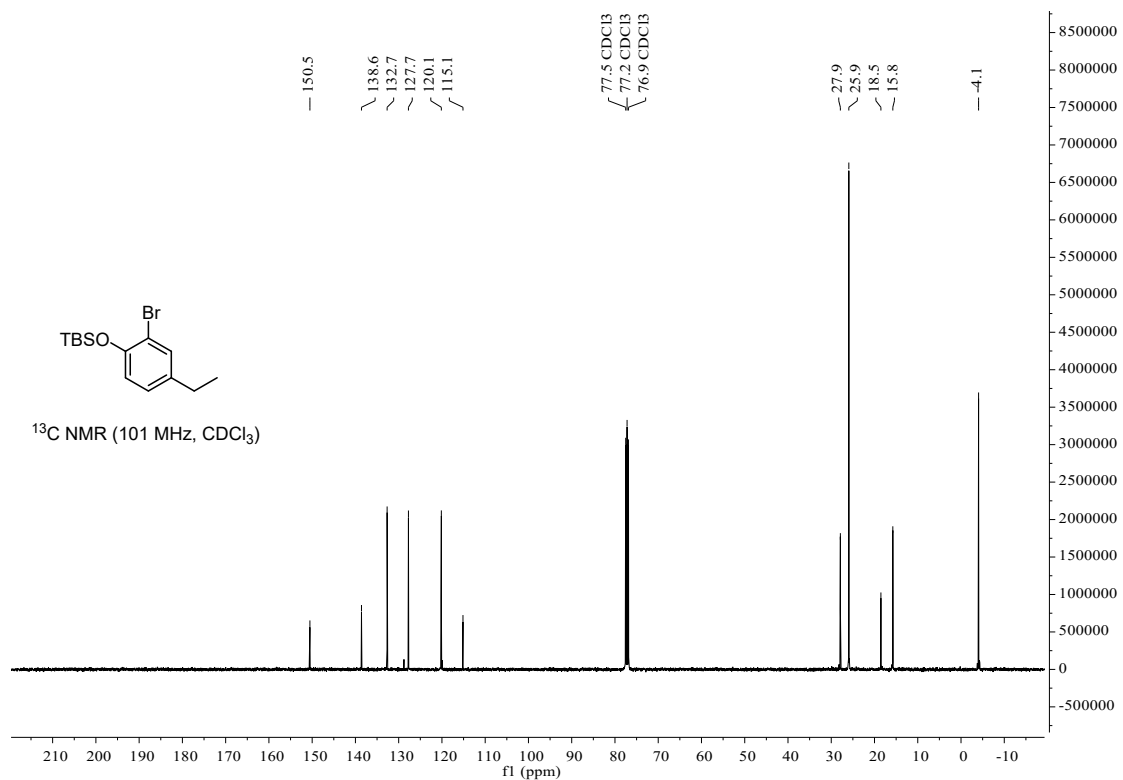

## Compound 18

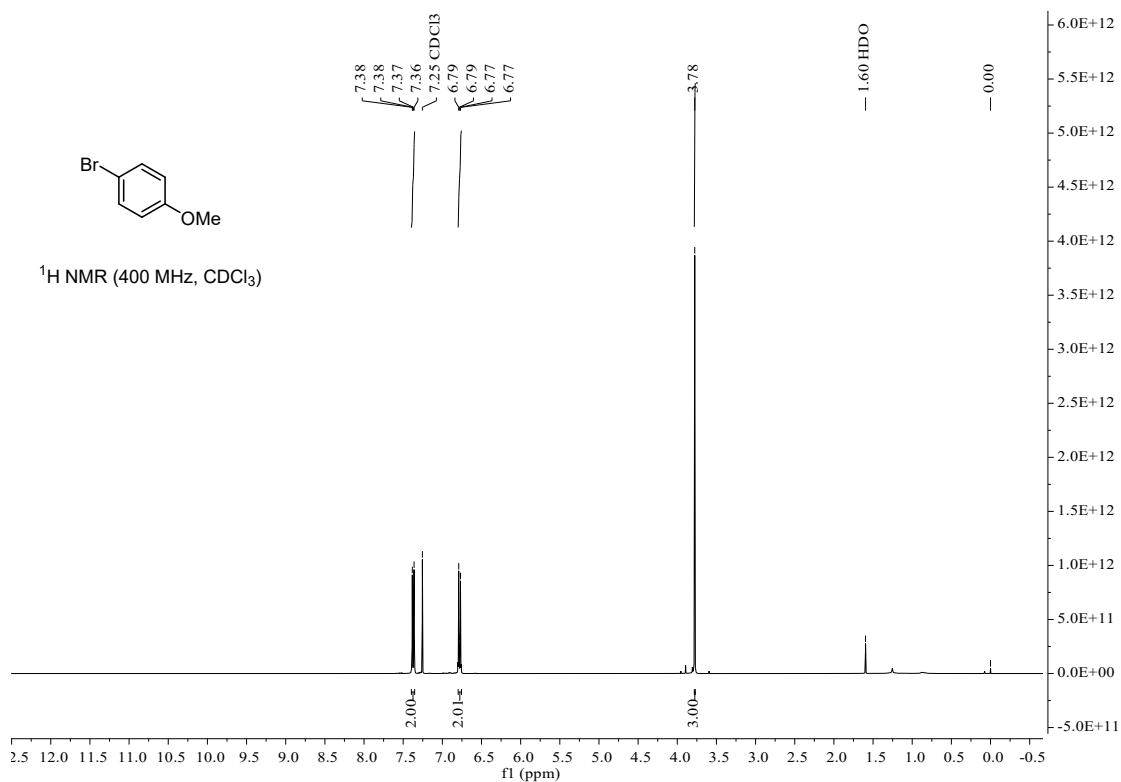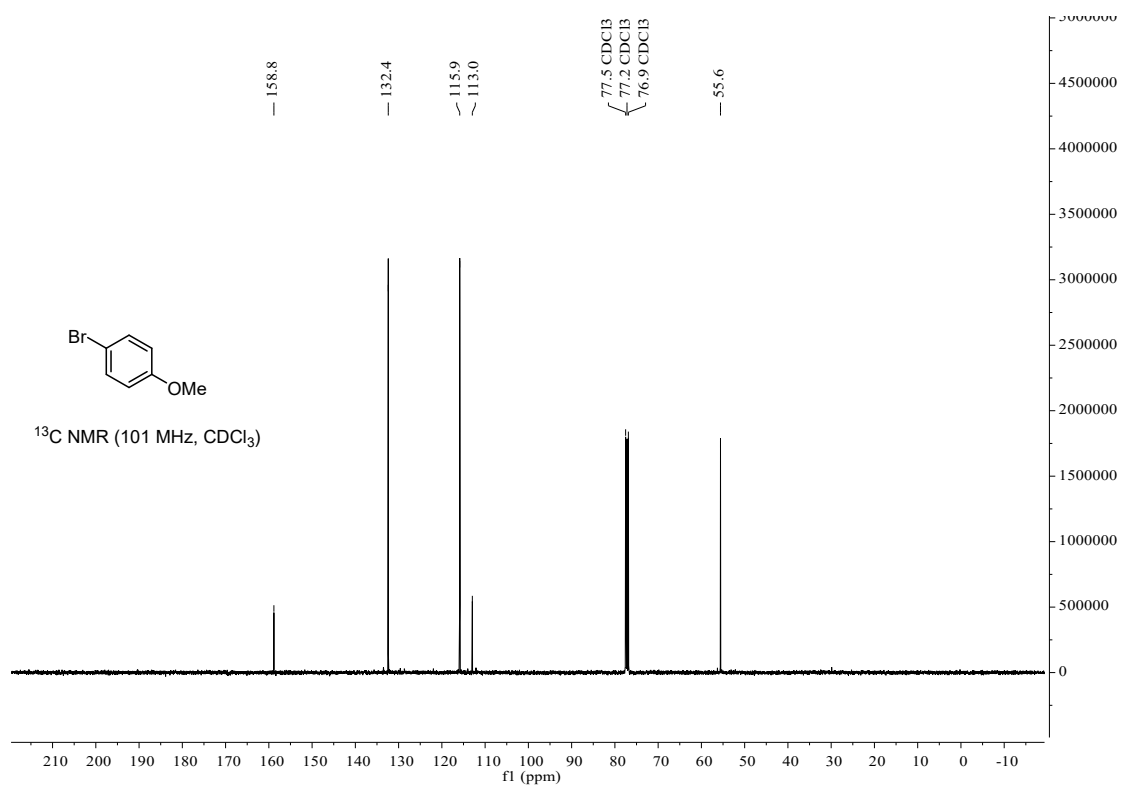

**Compound 19**

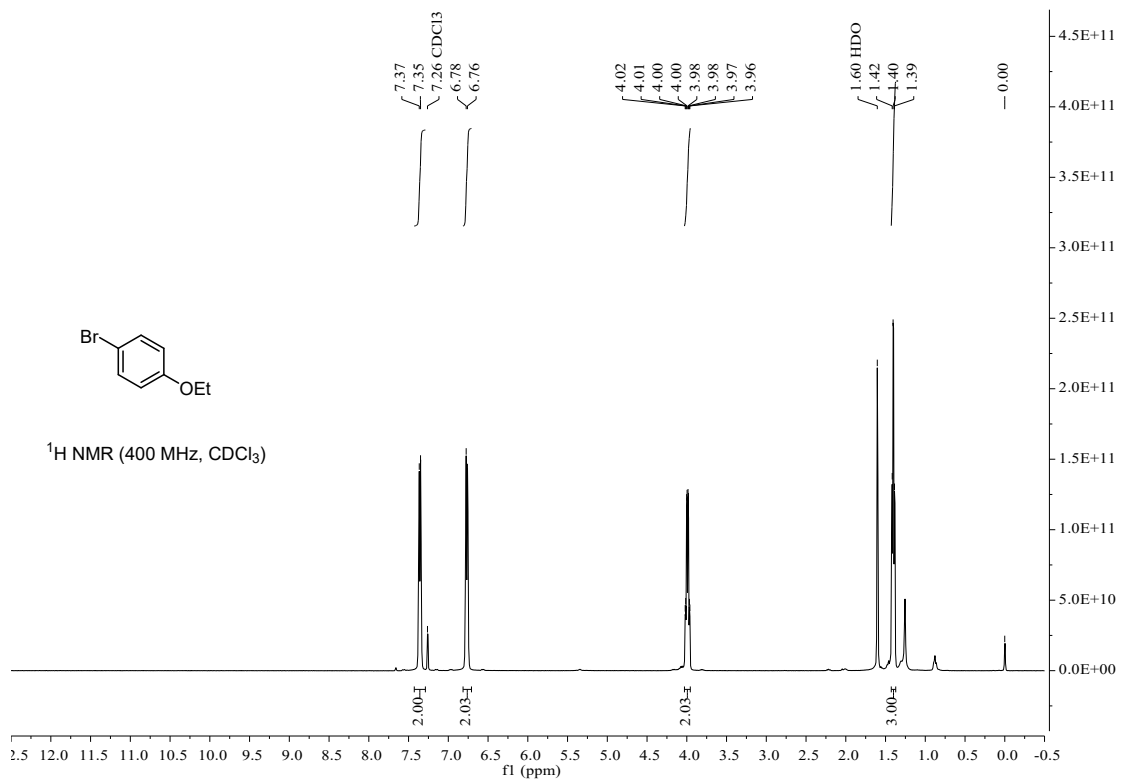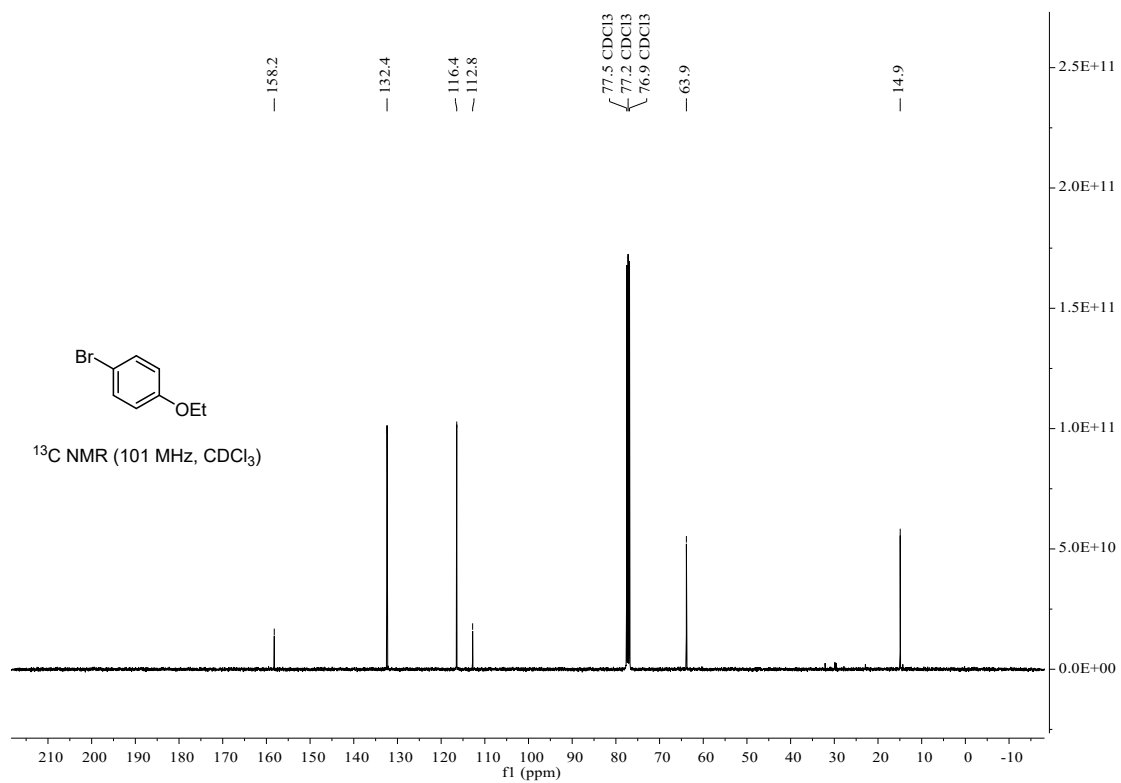

**Compound 20**

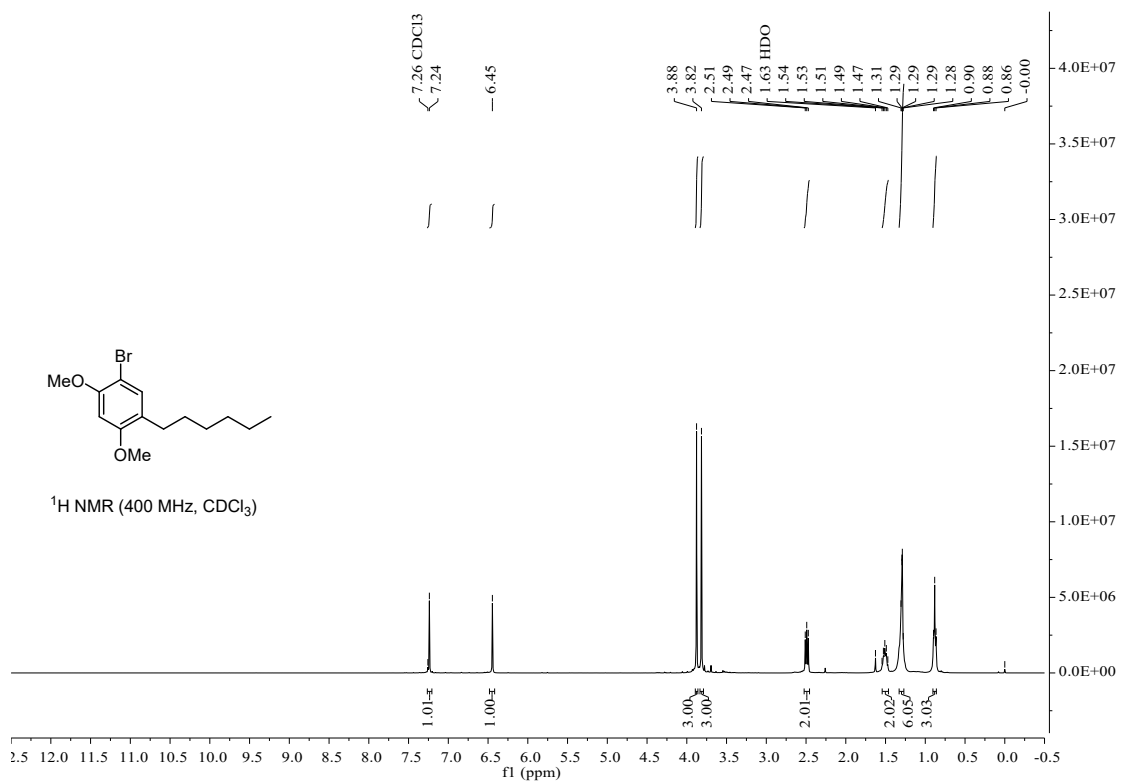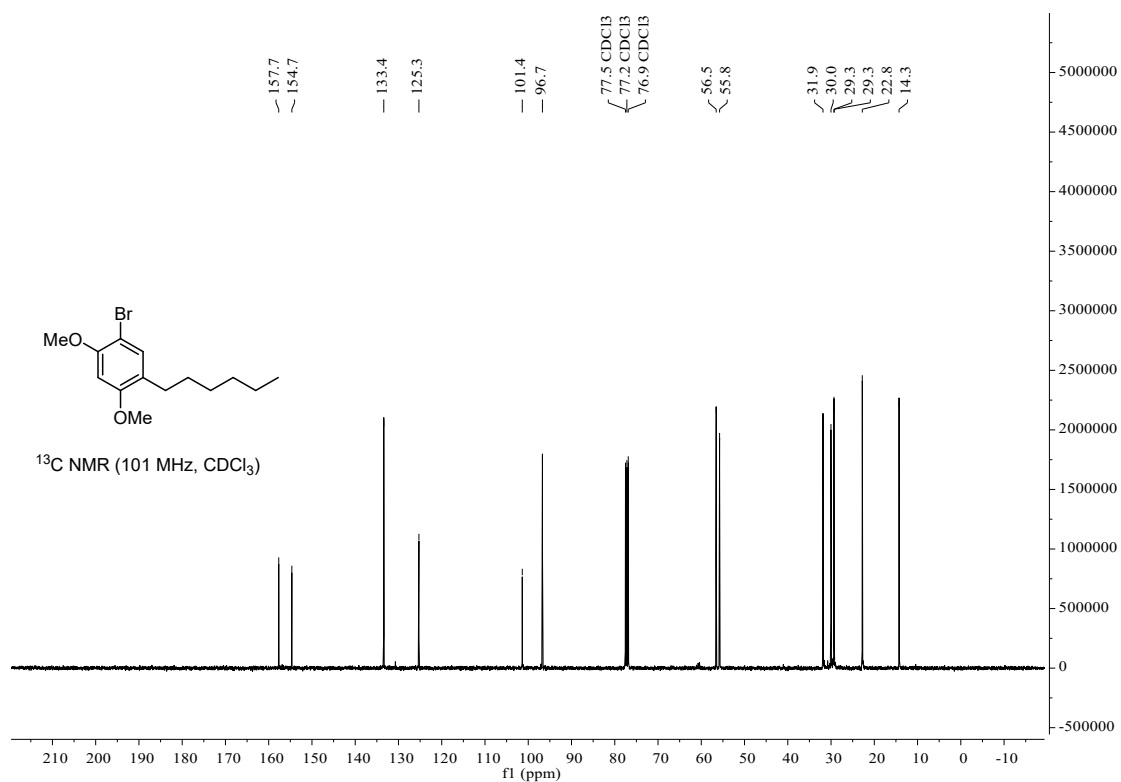

**Compound 21**

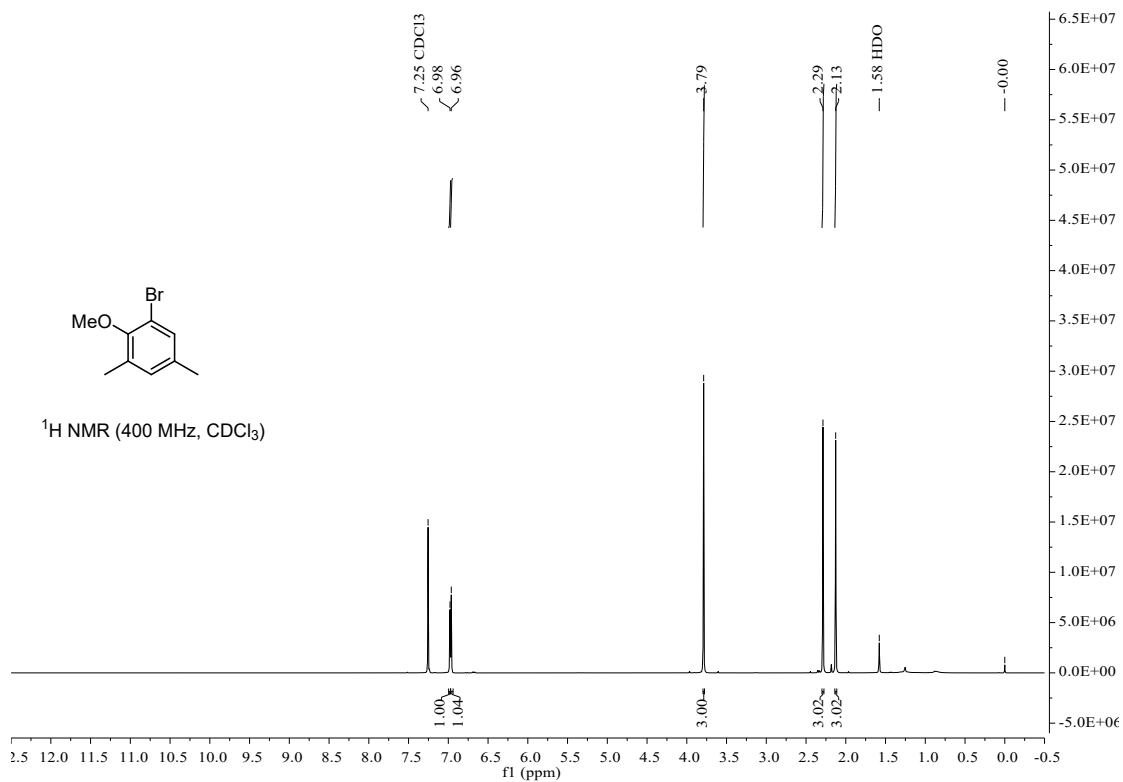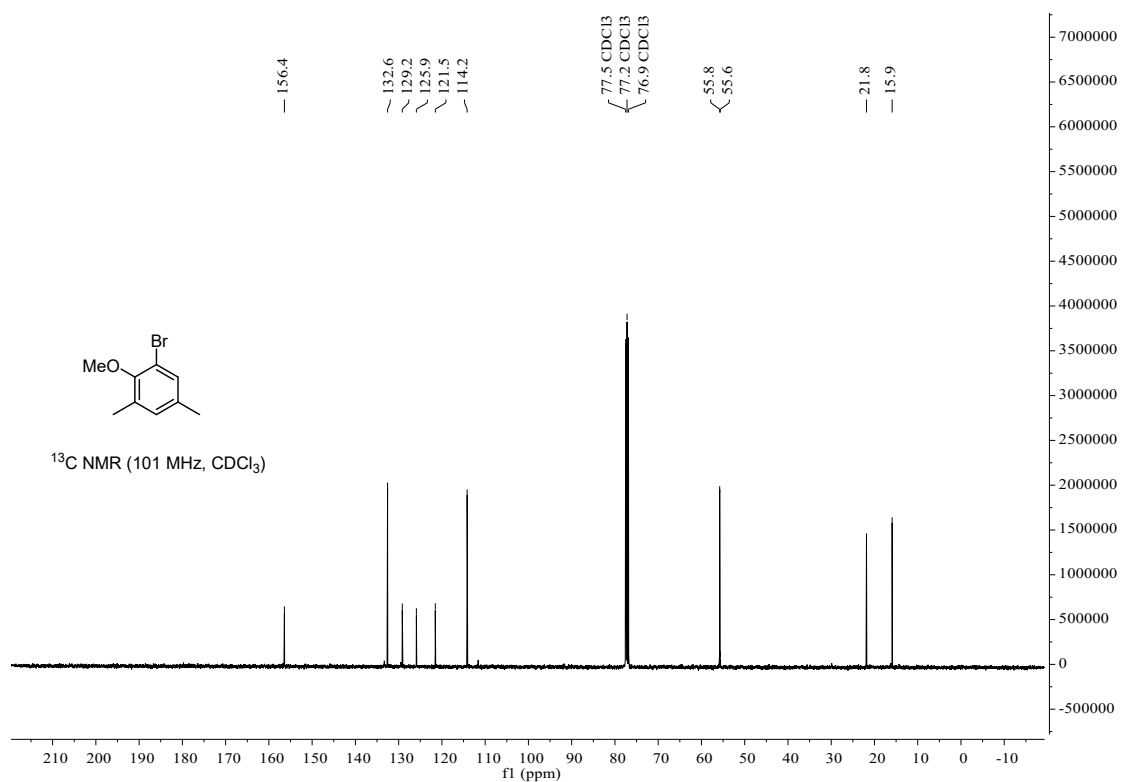

**Compound 22**

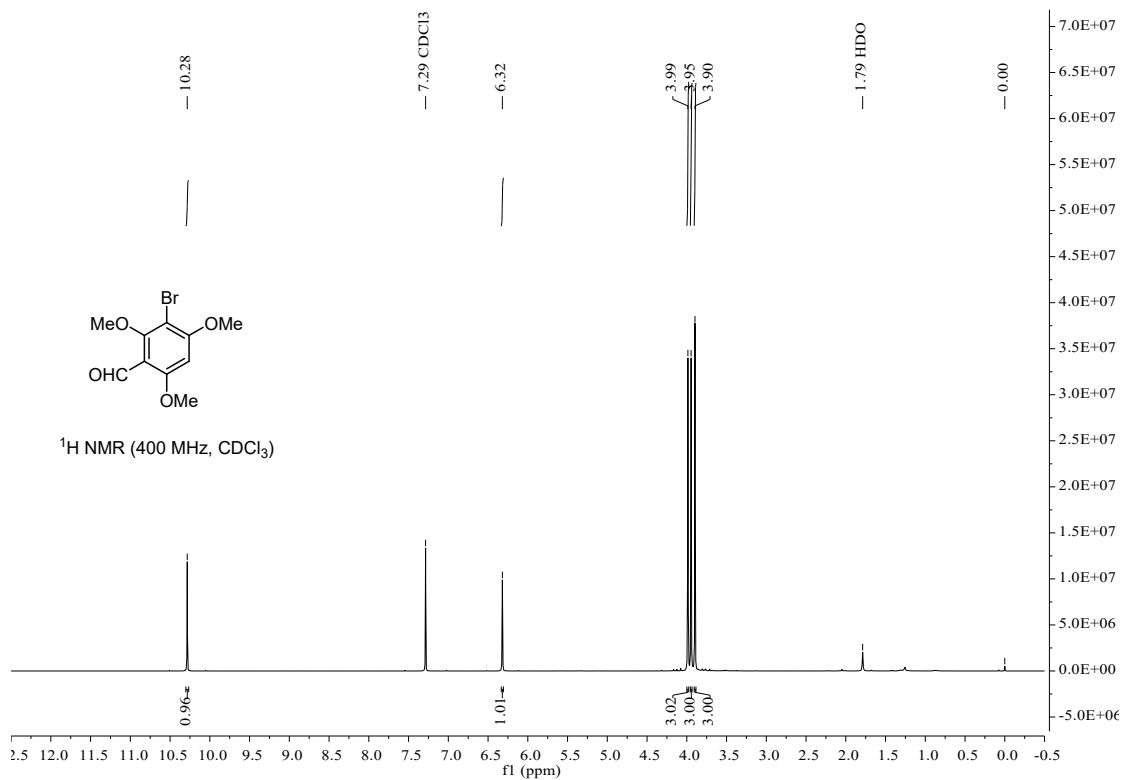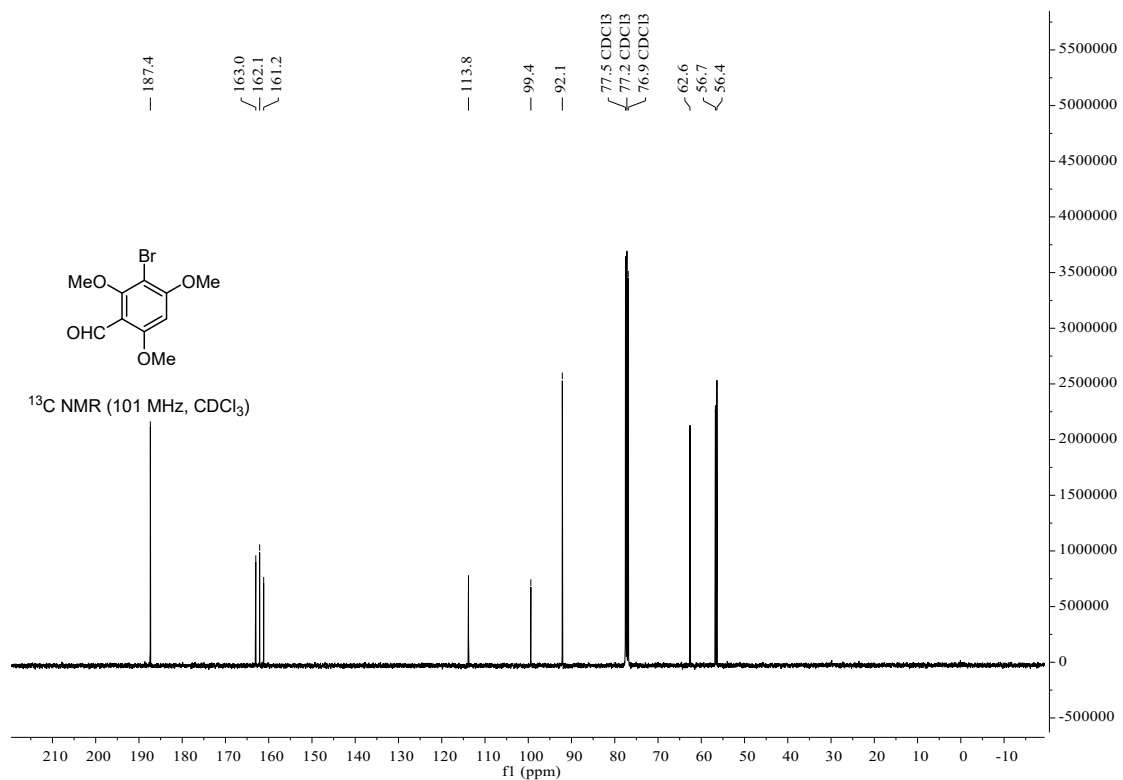

**Compound 23**

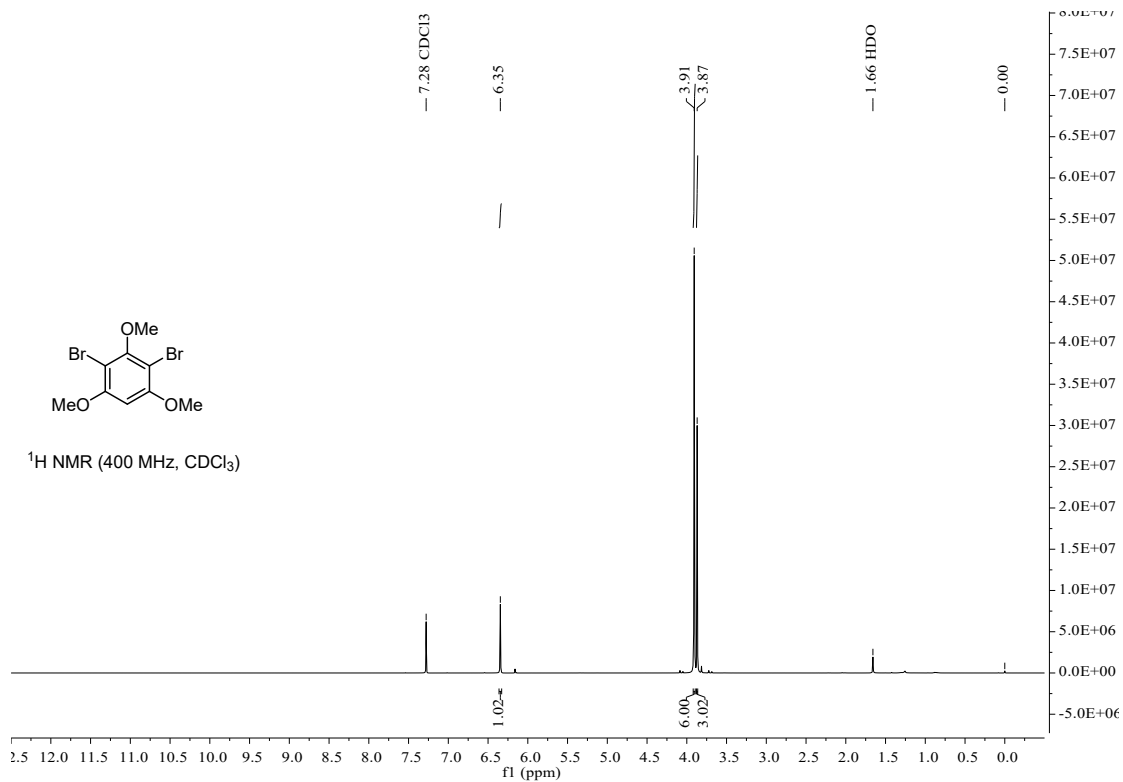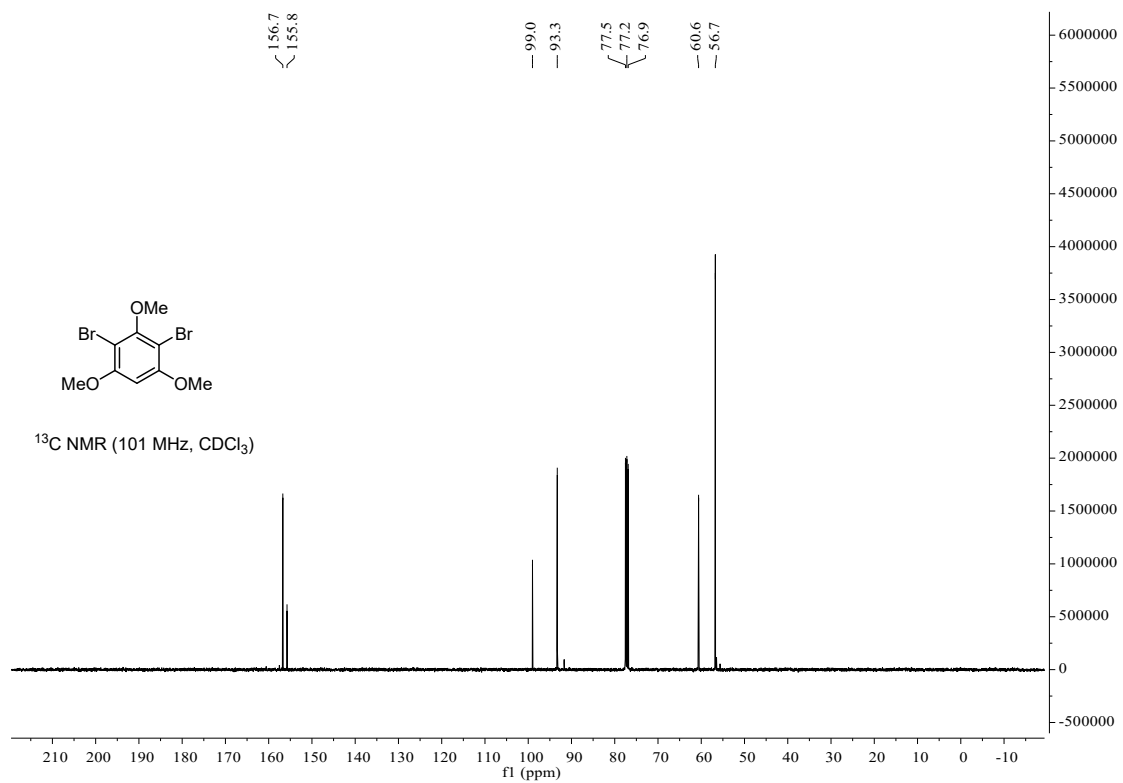

## Compound 24



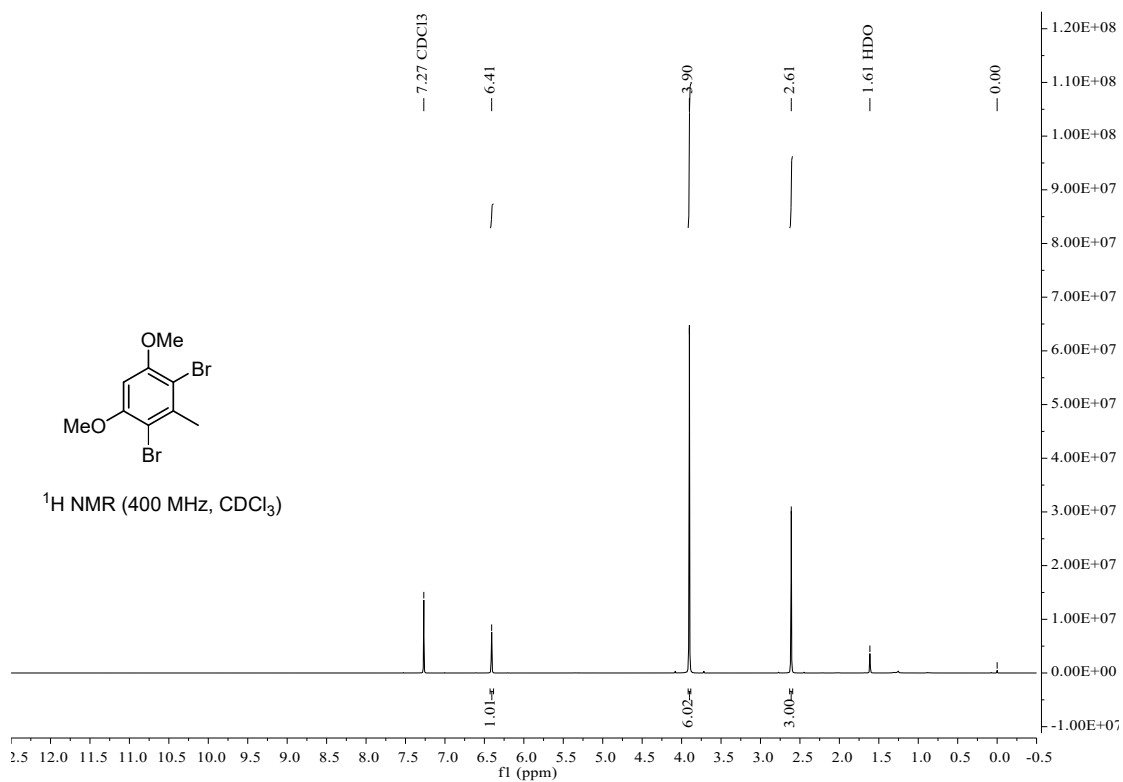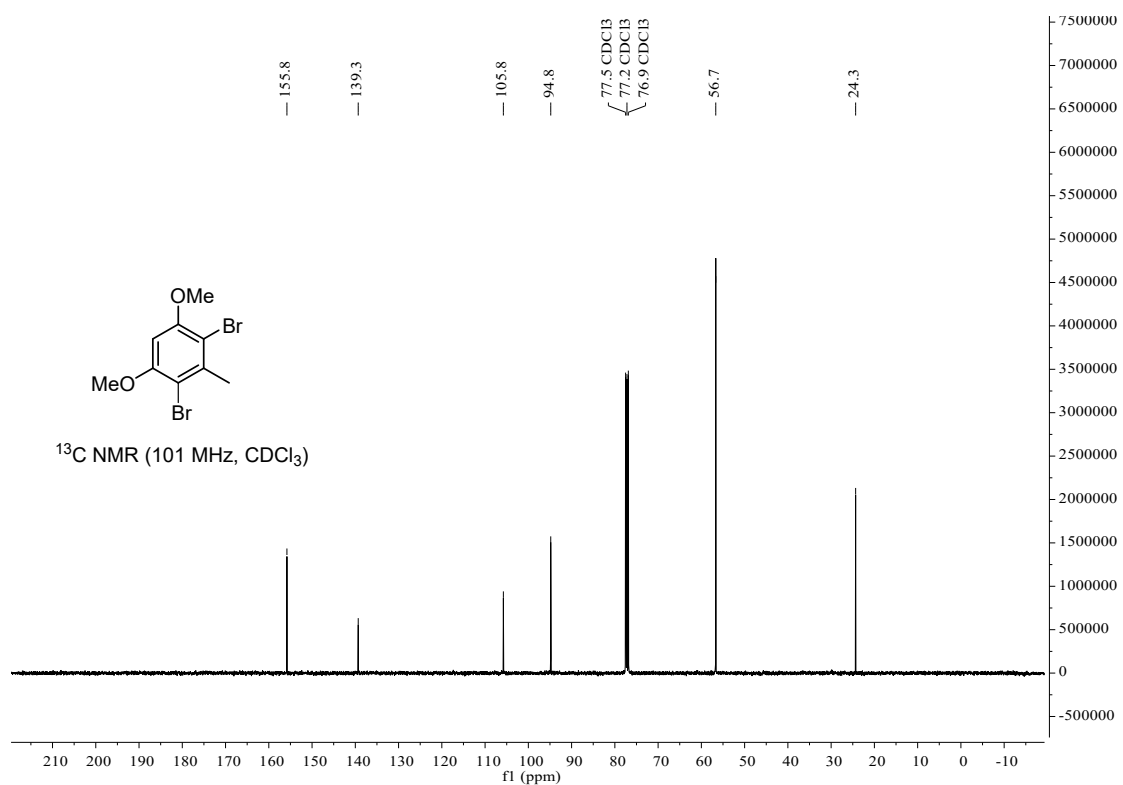

## Compound 25

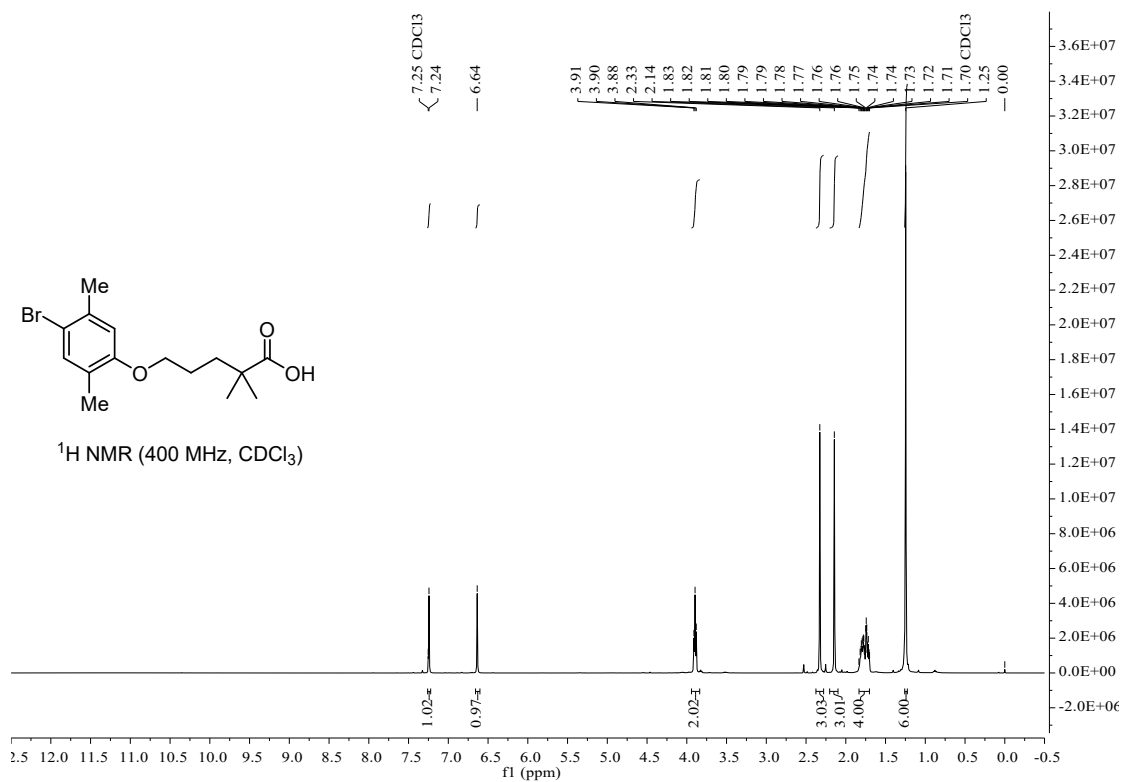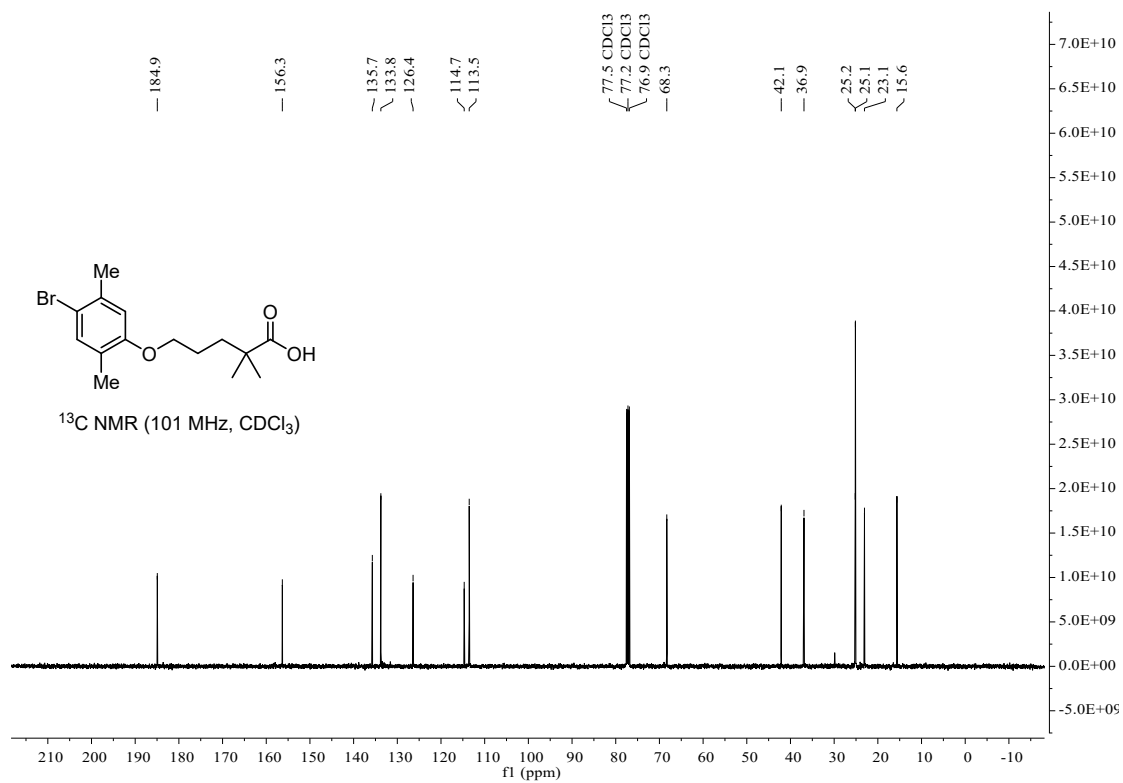

**Compound 26**

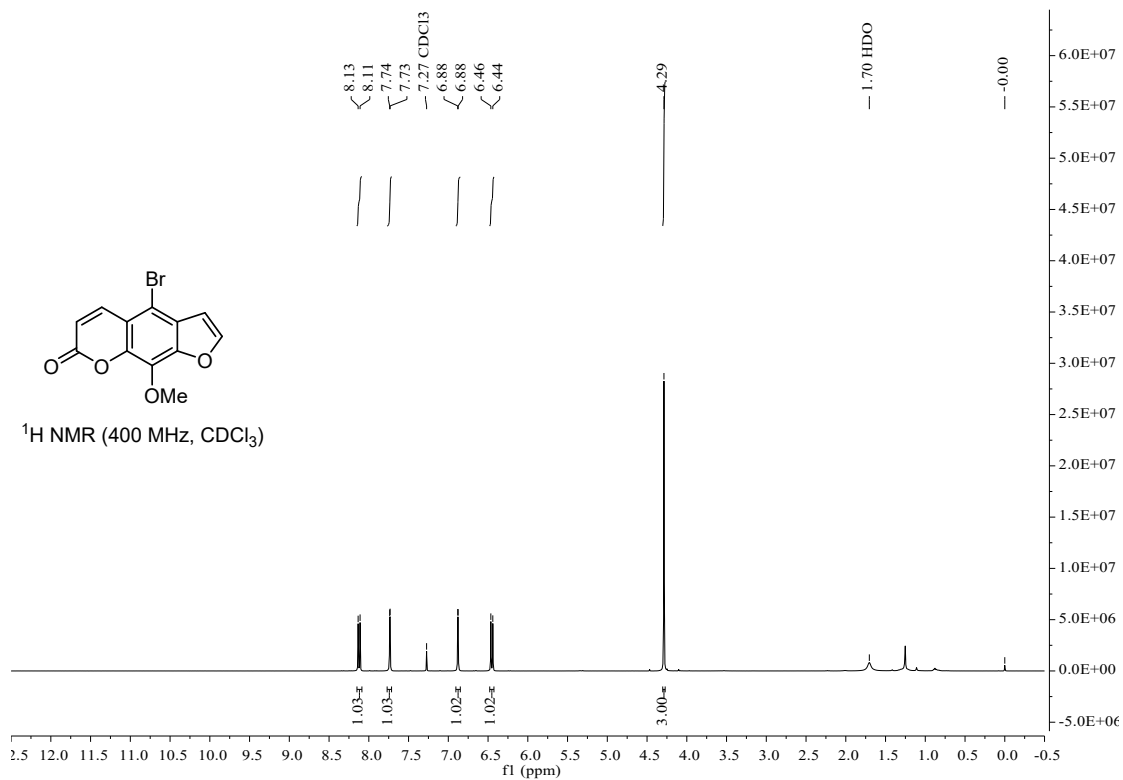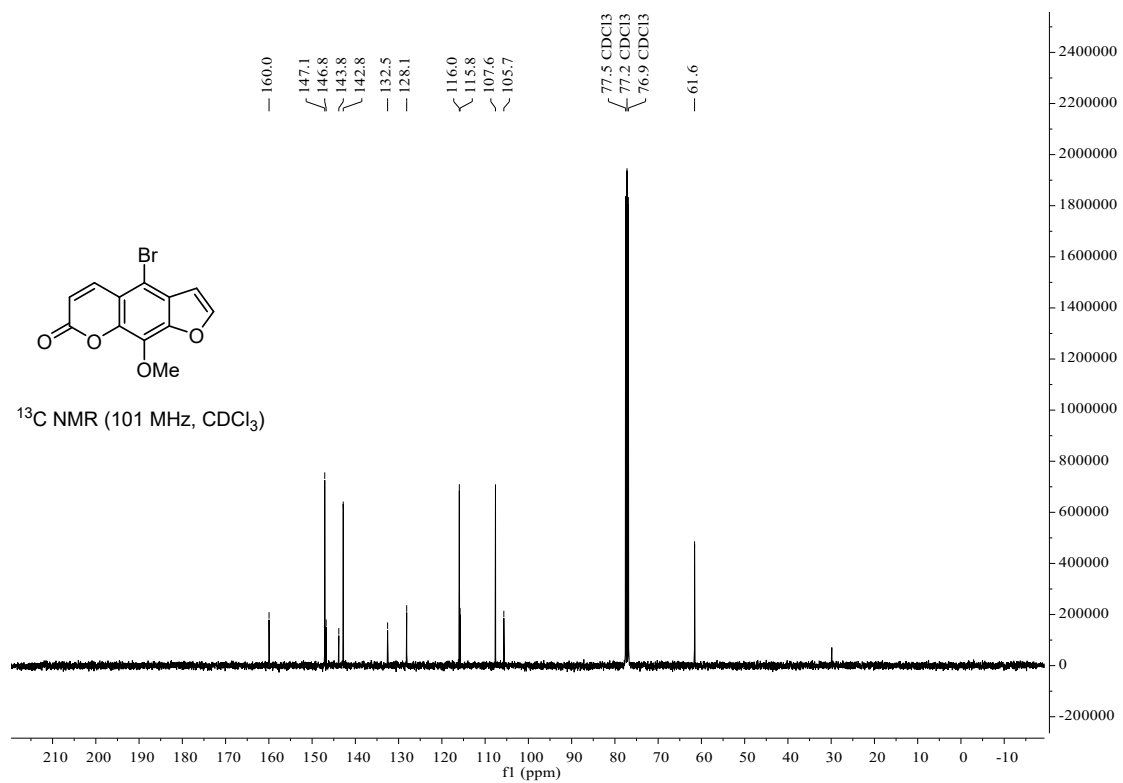

## Compound 27

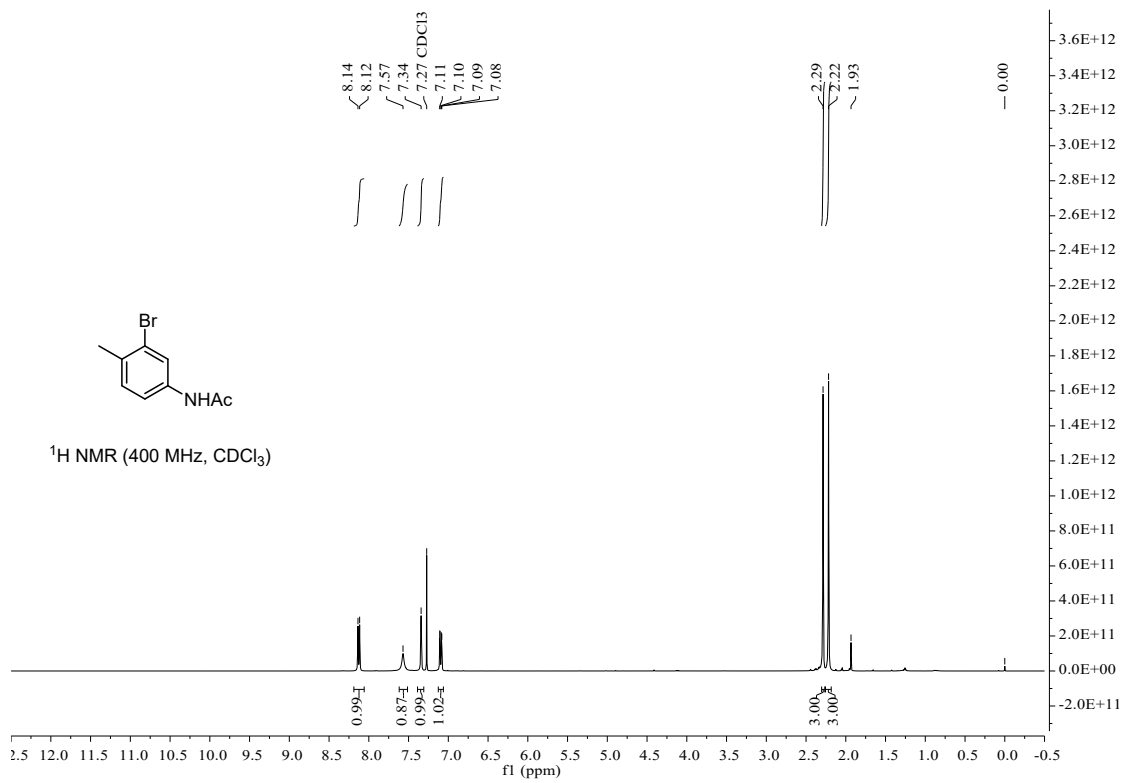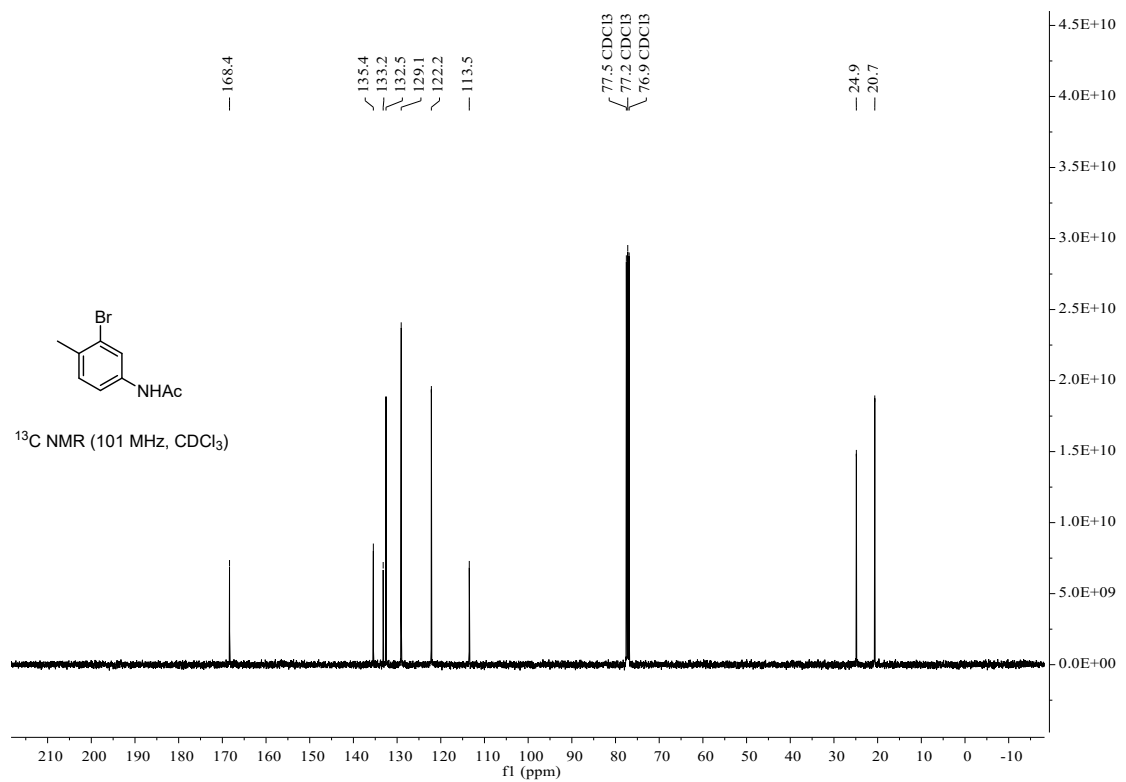

**Compound 28**

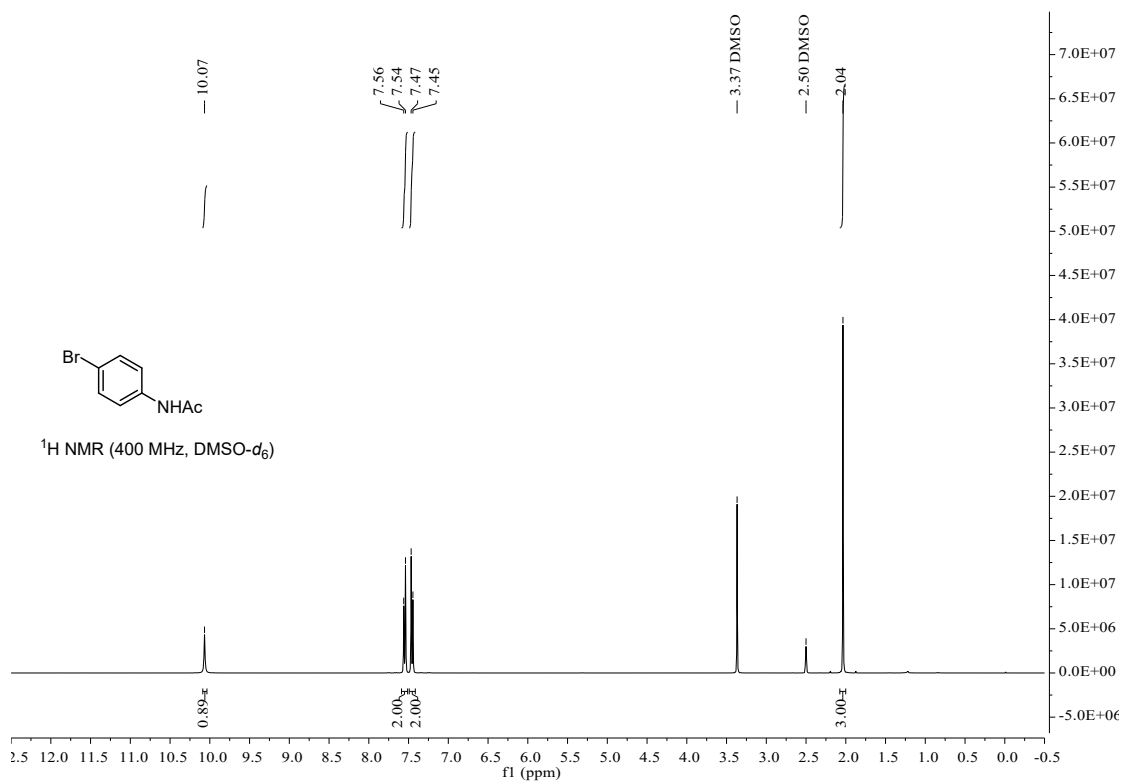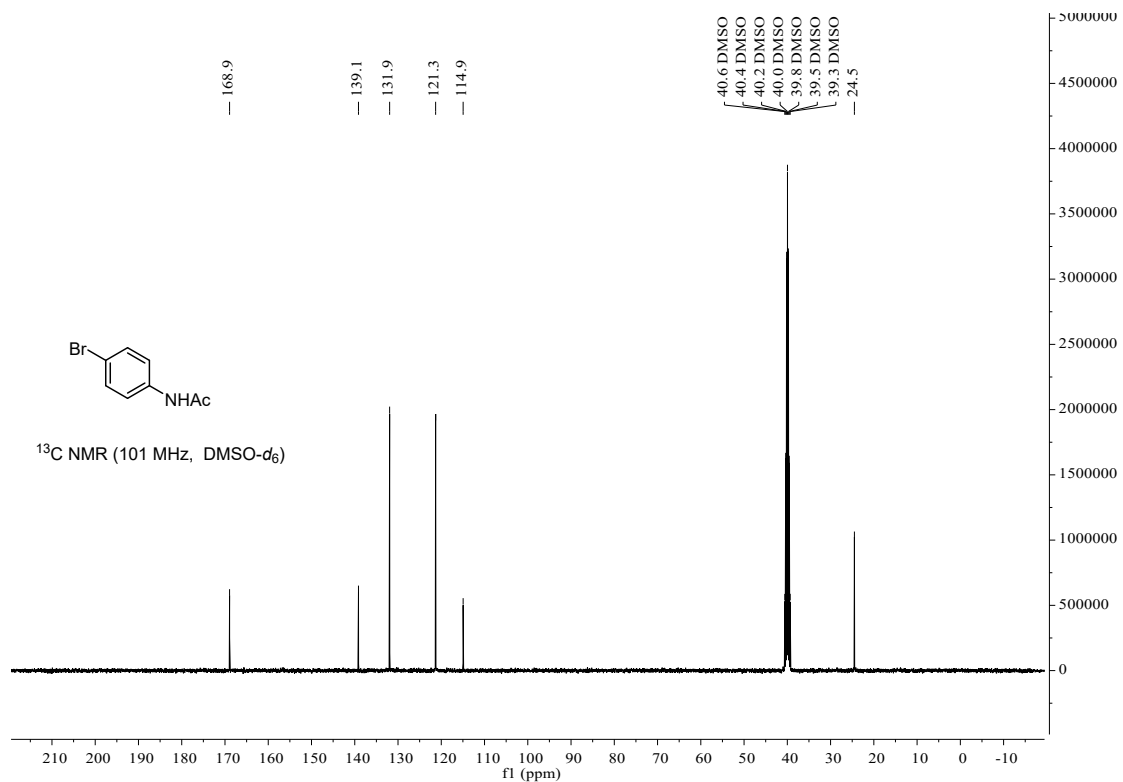

**Compound 29**

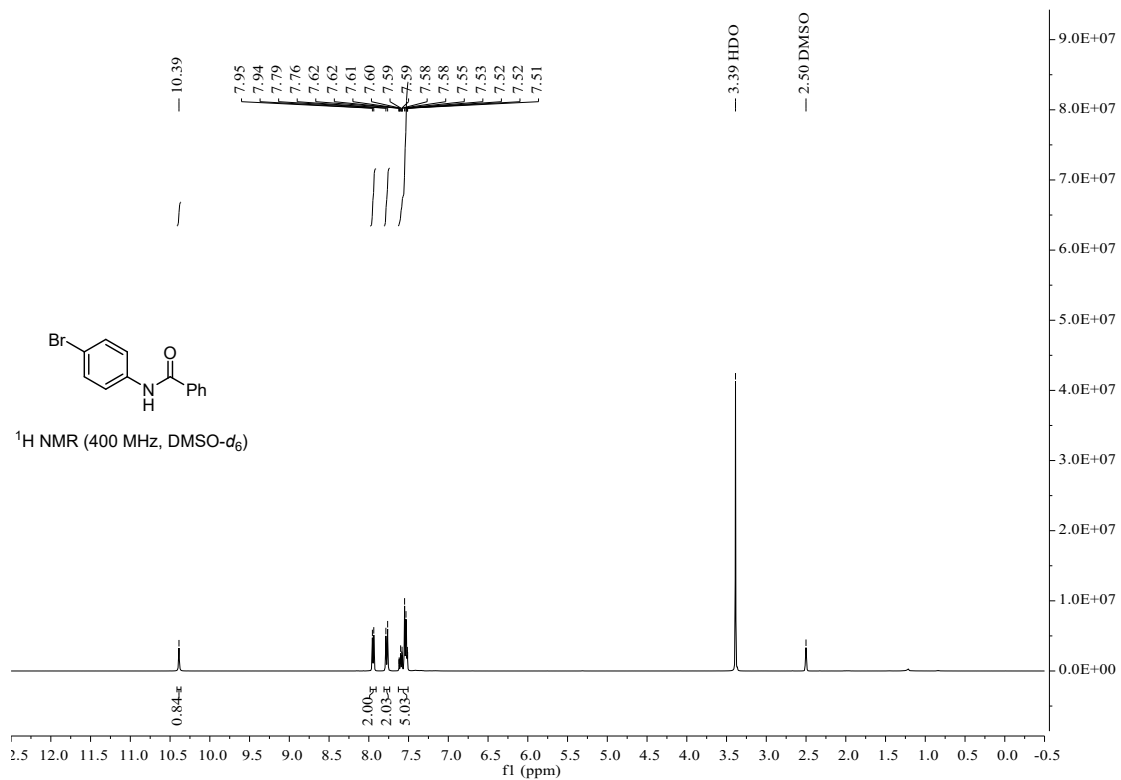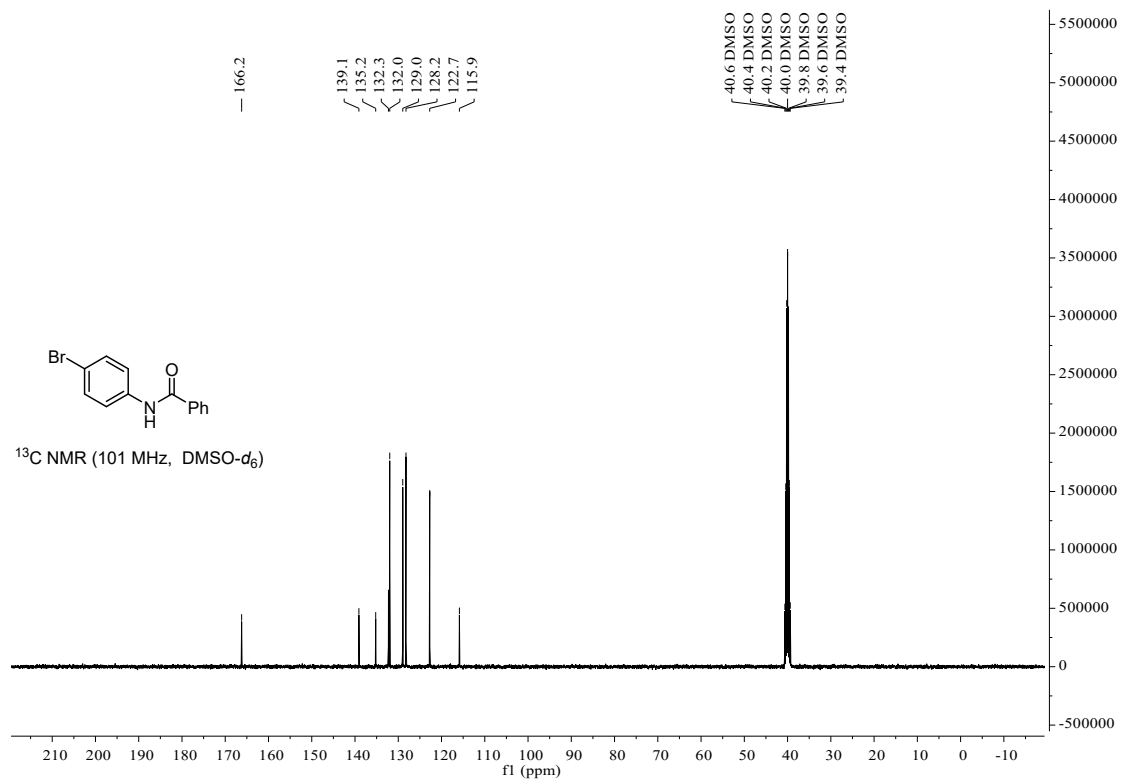

### Compound 30

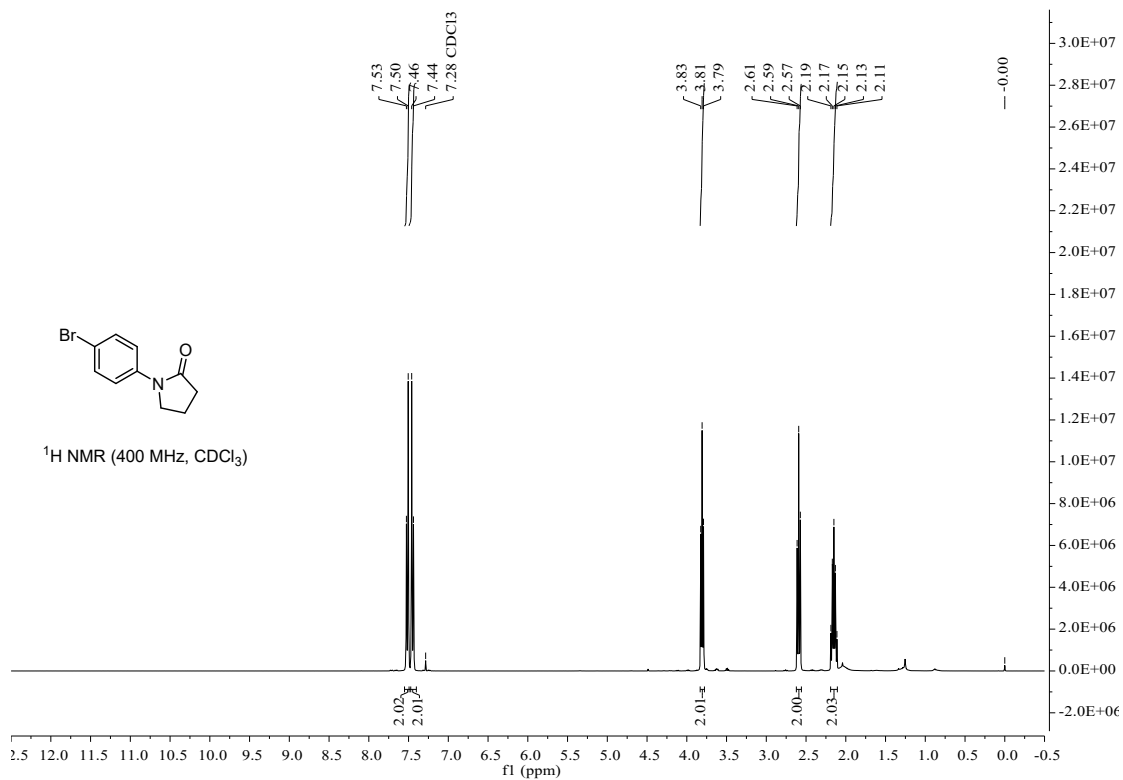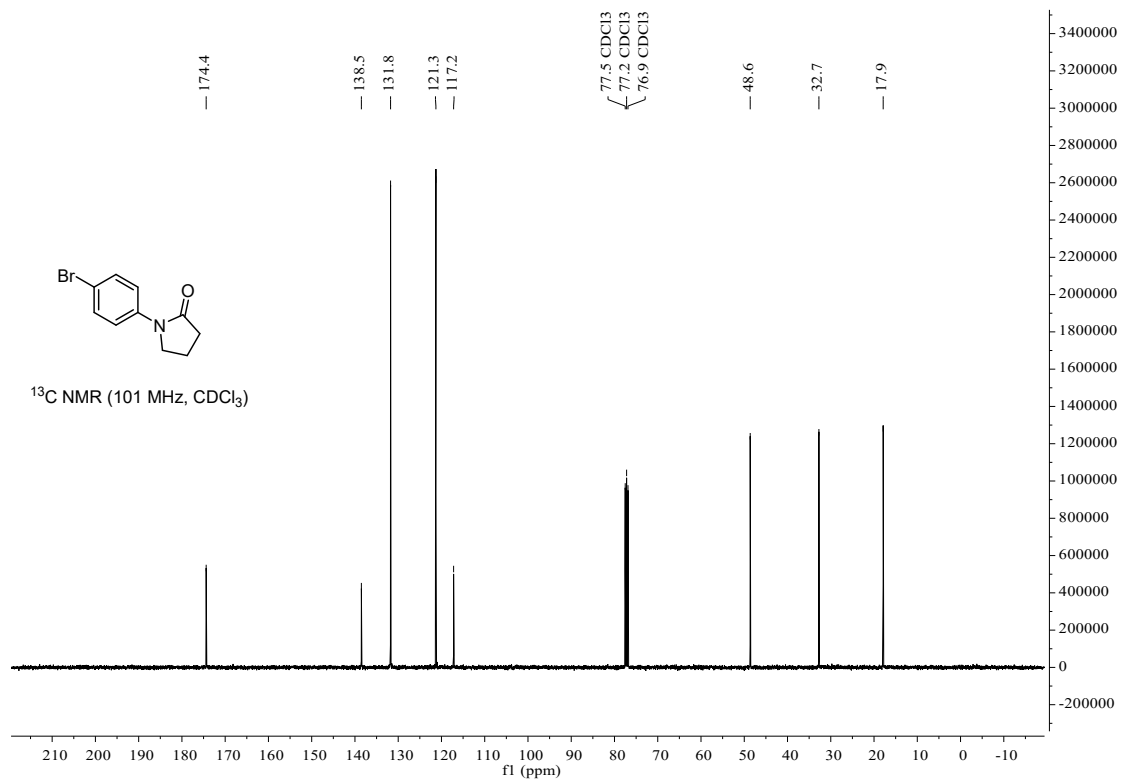

**Compound 31**

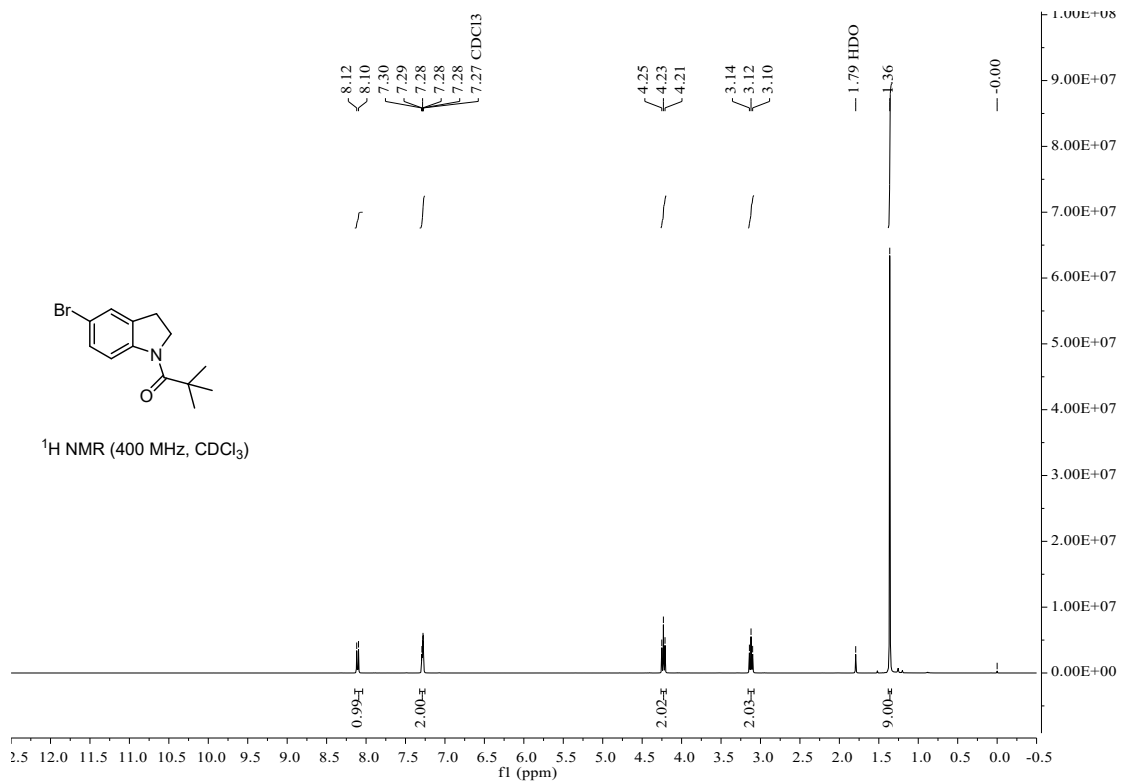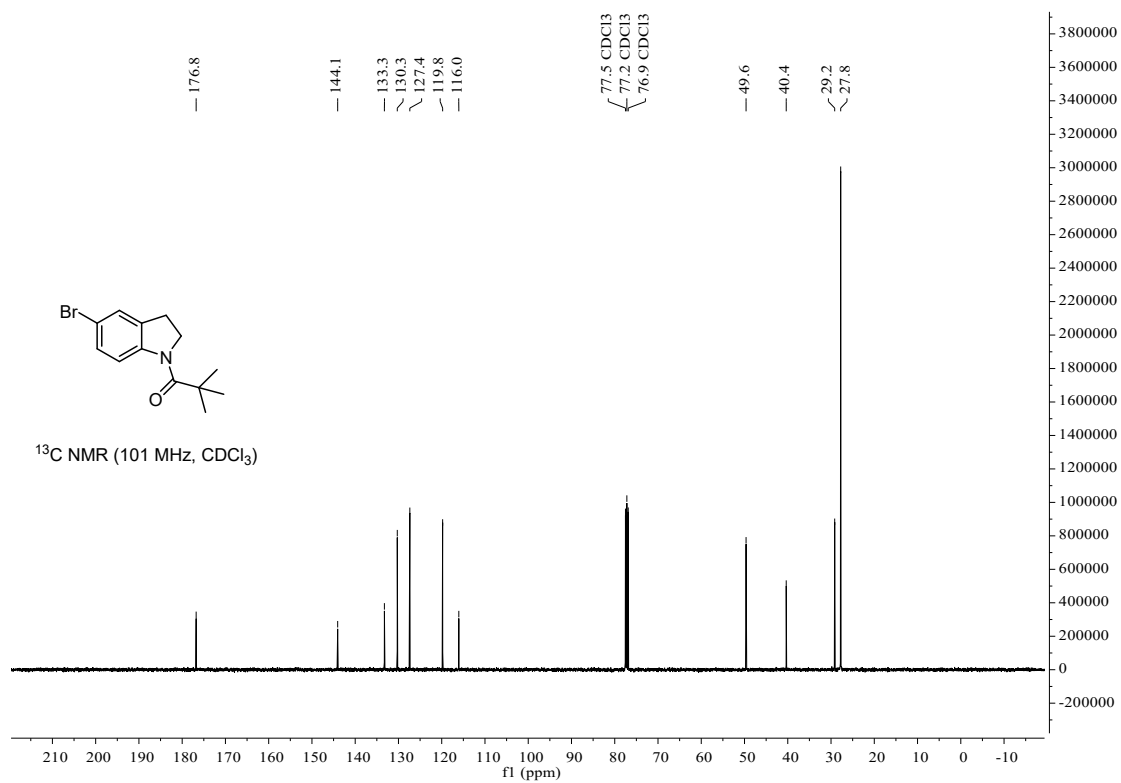

**Compound 32**



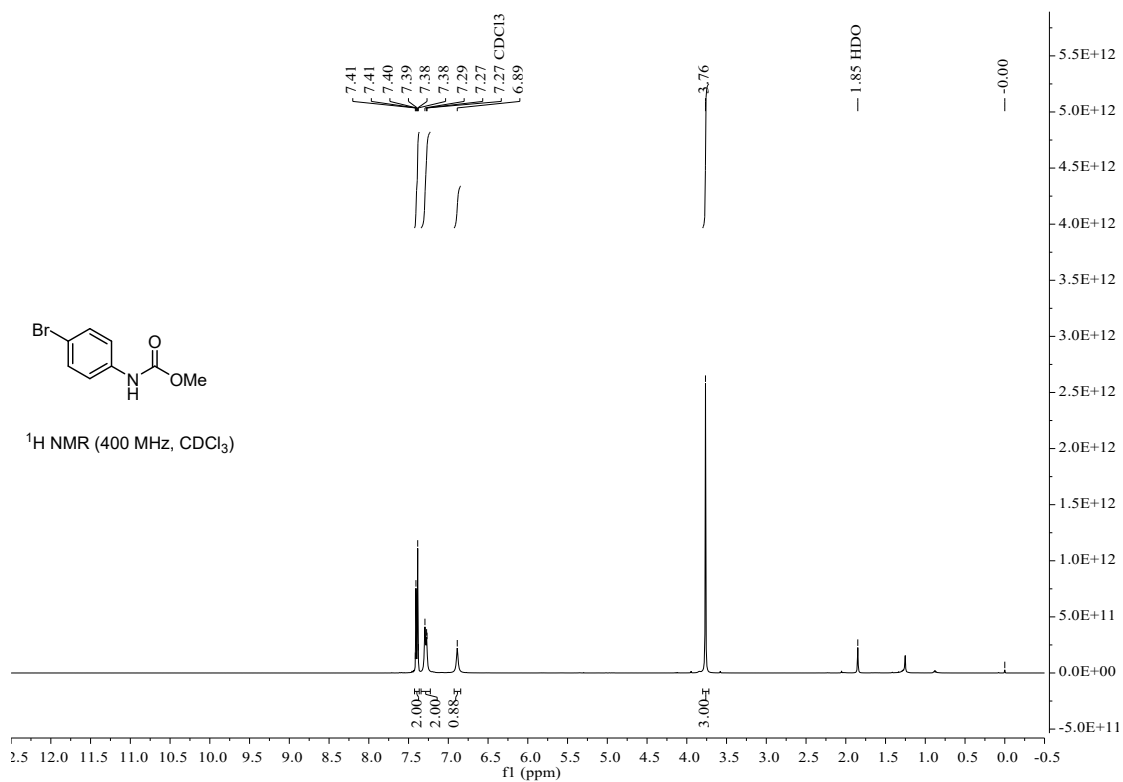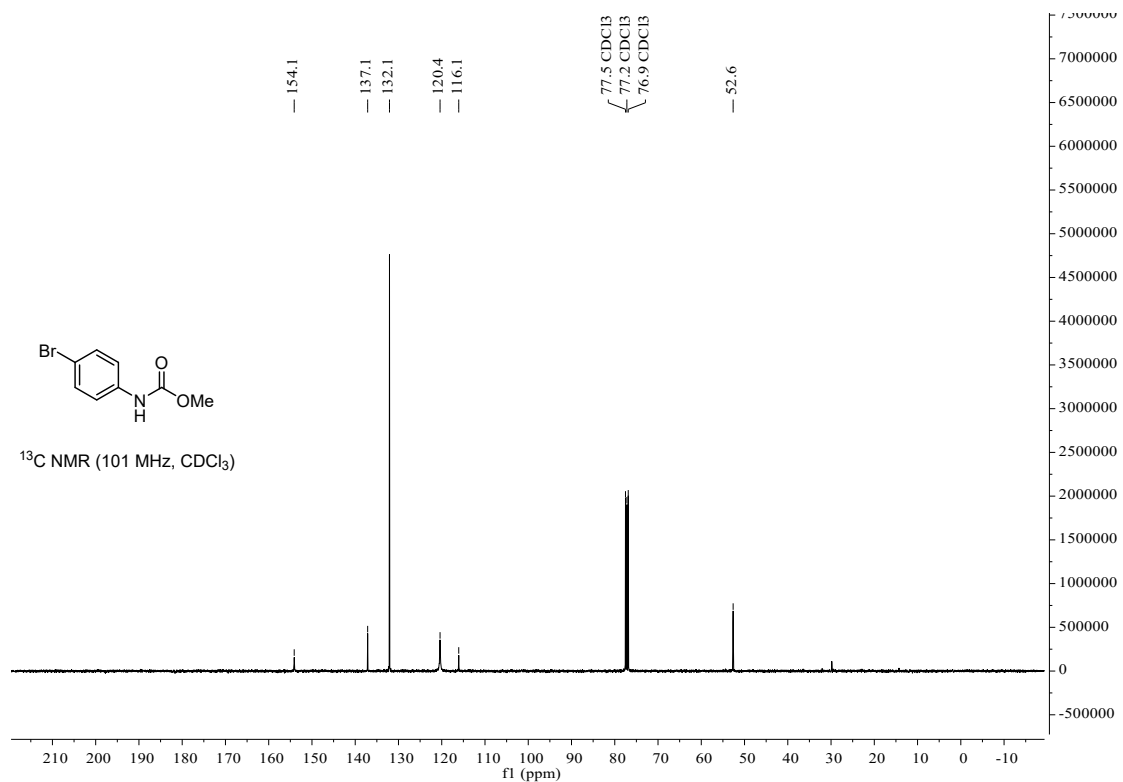

### Compound 33

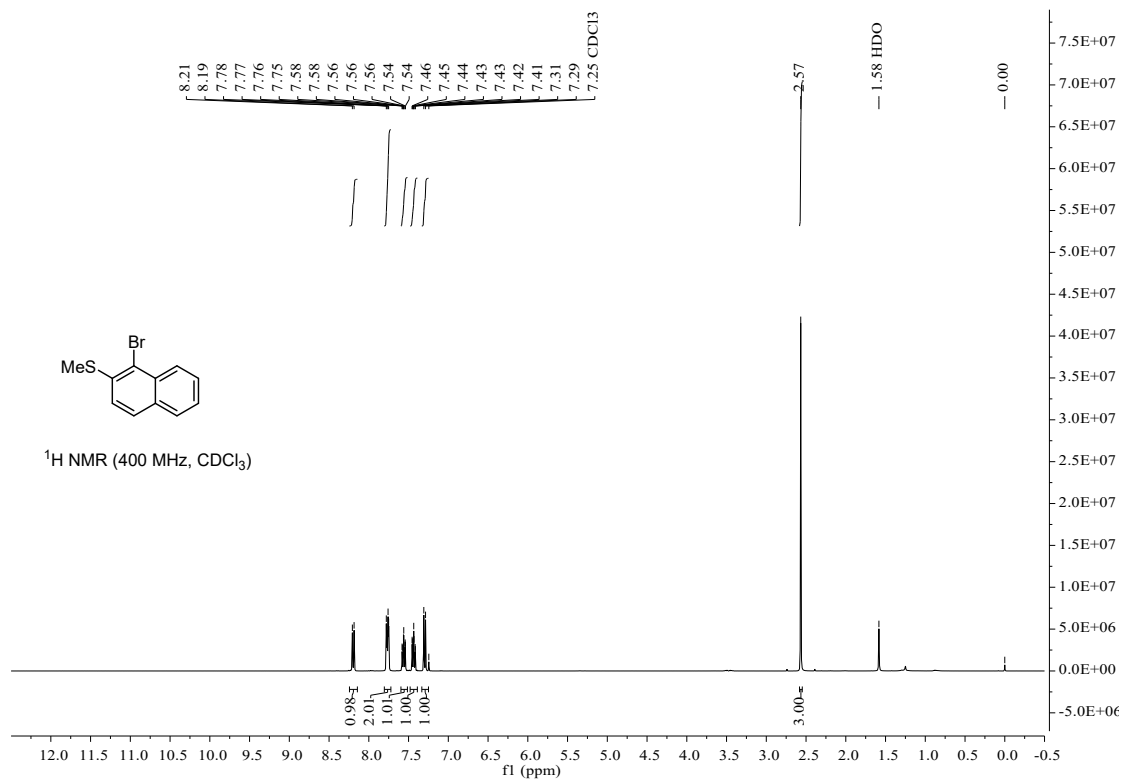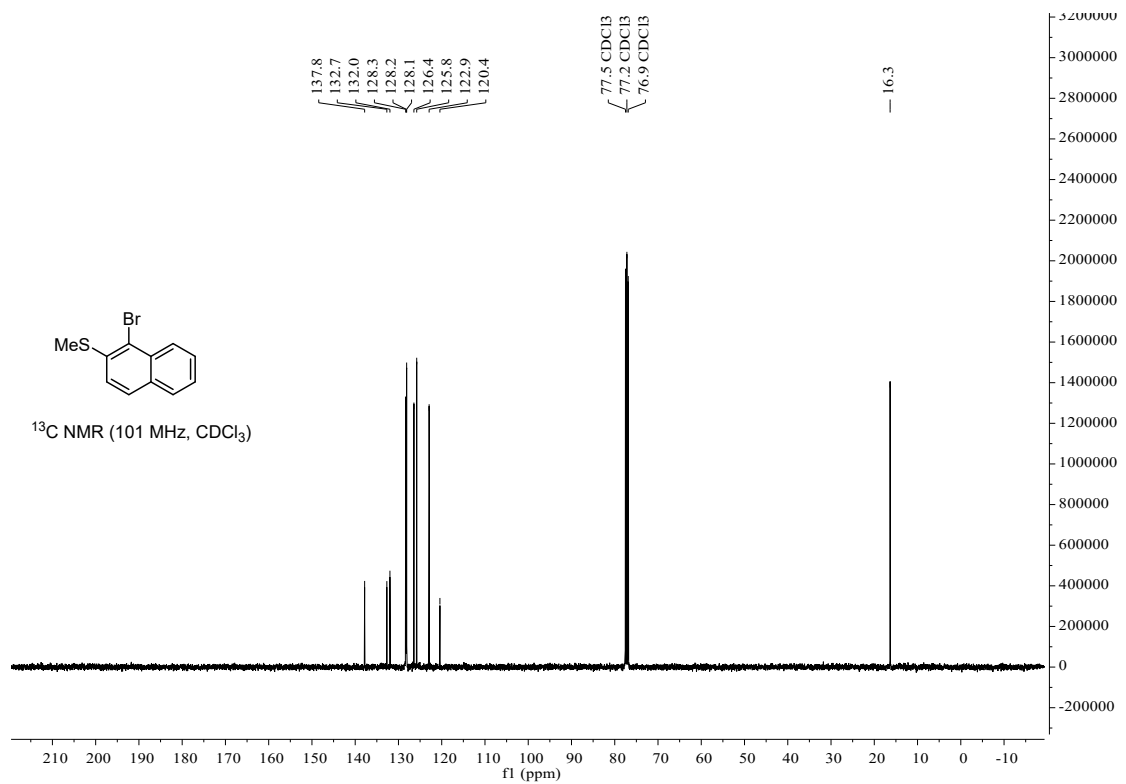

## Compound 34

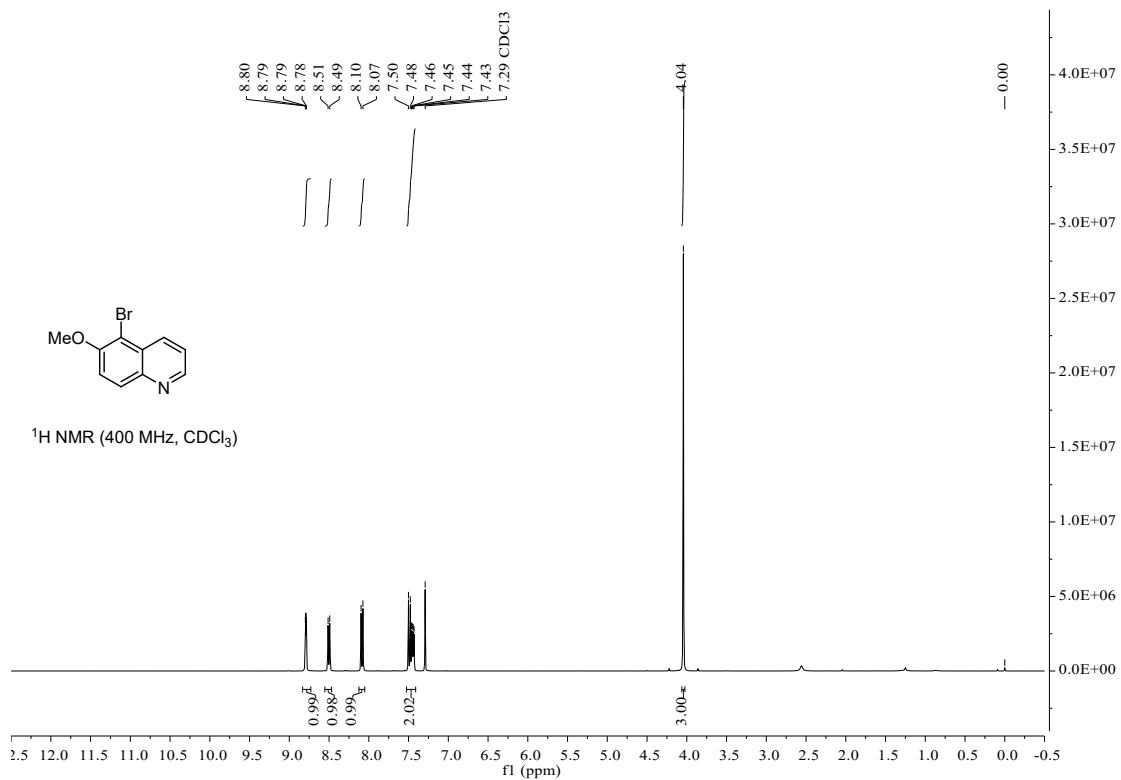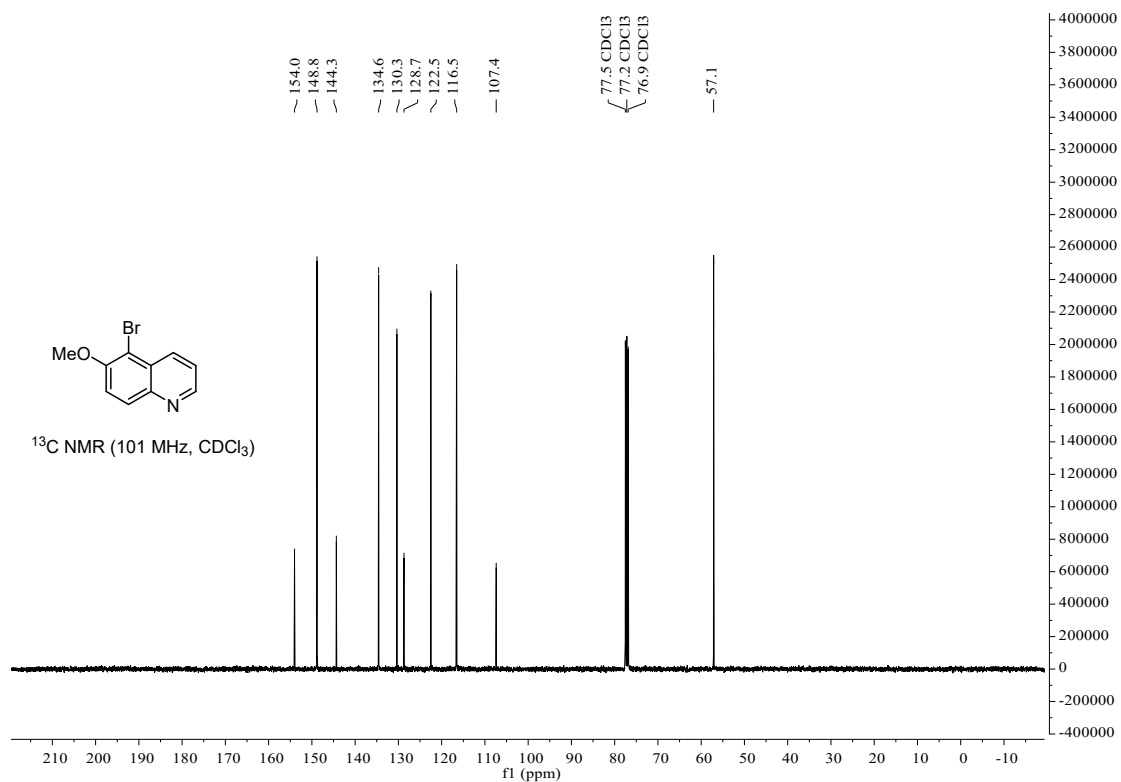

**Compound 35**

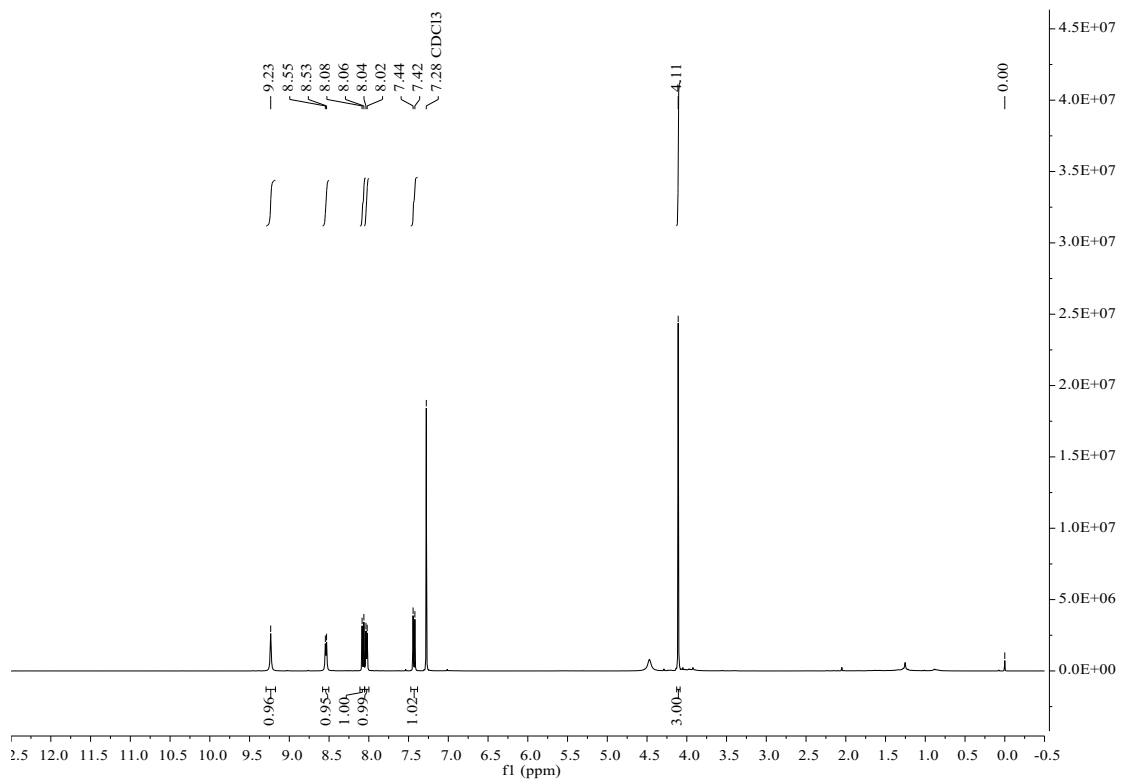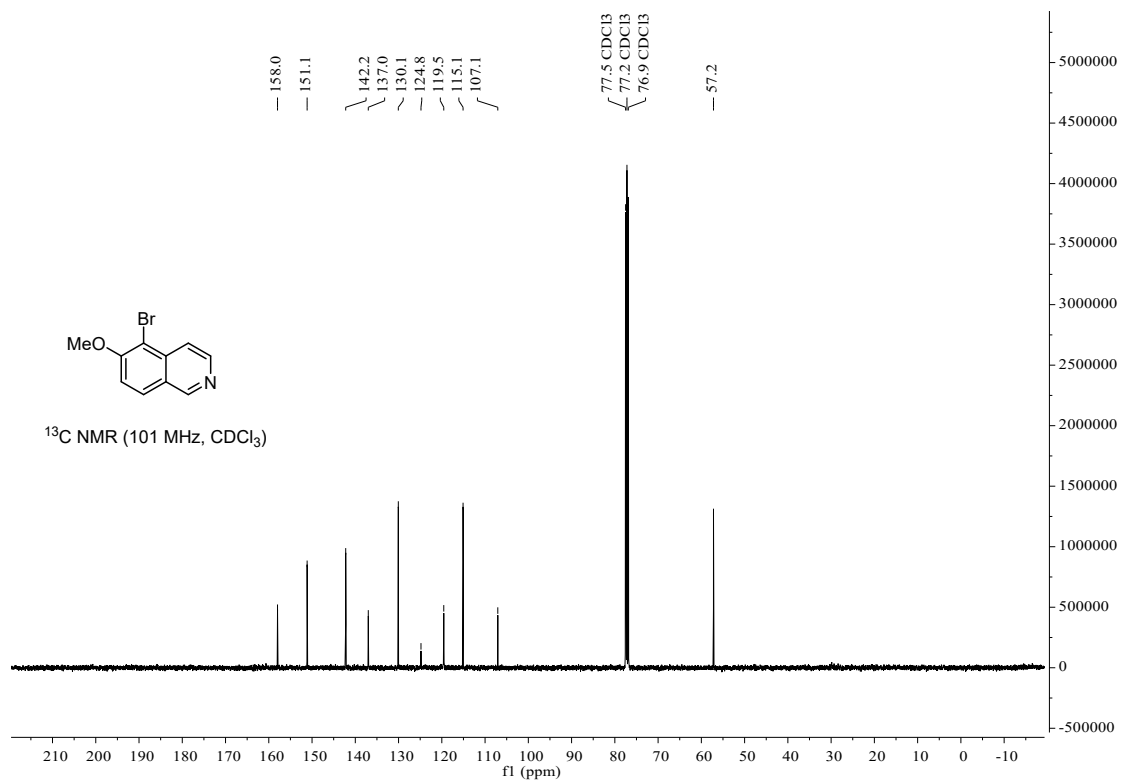

**Compound 36**

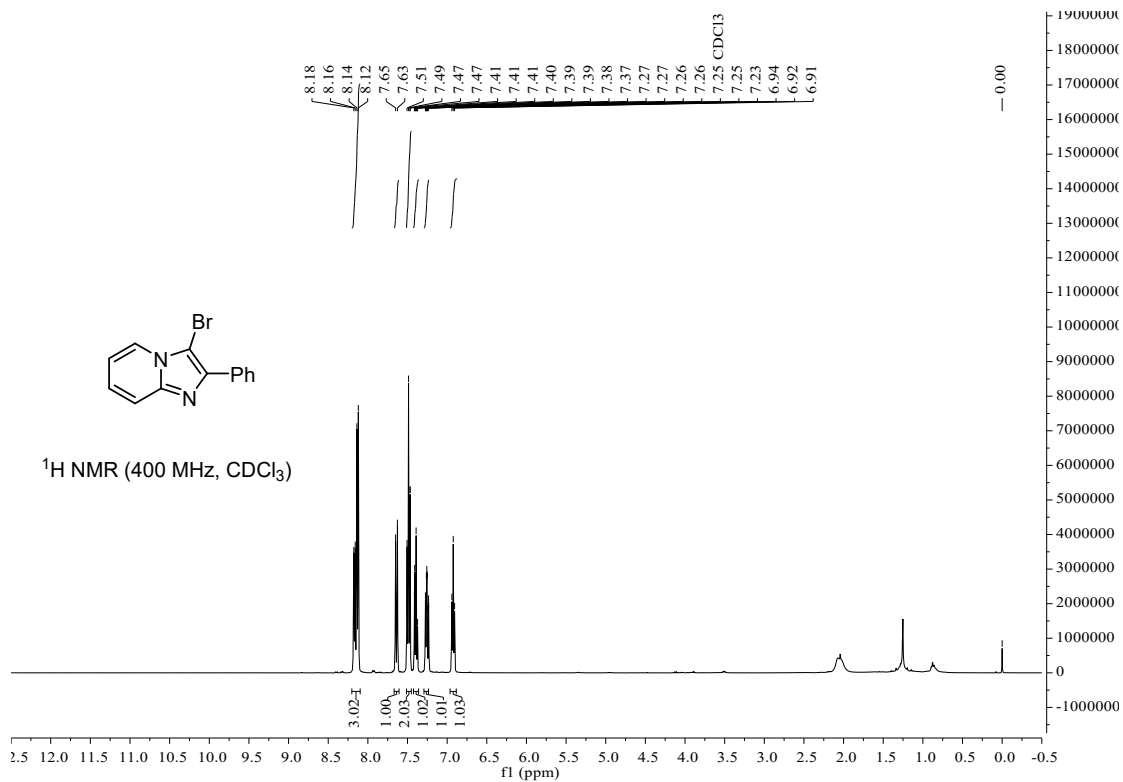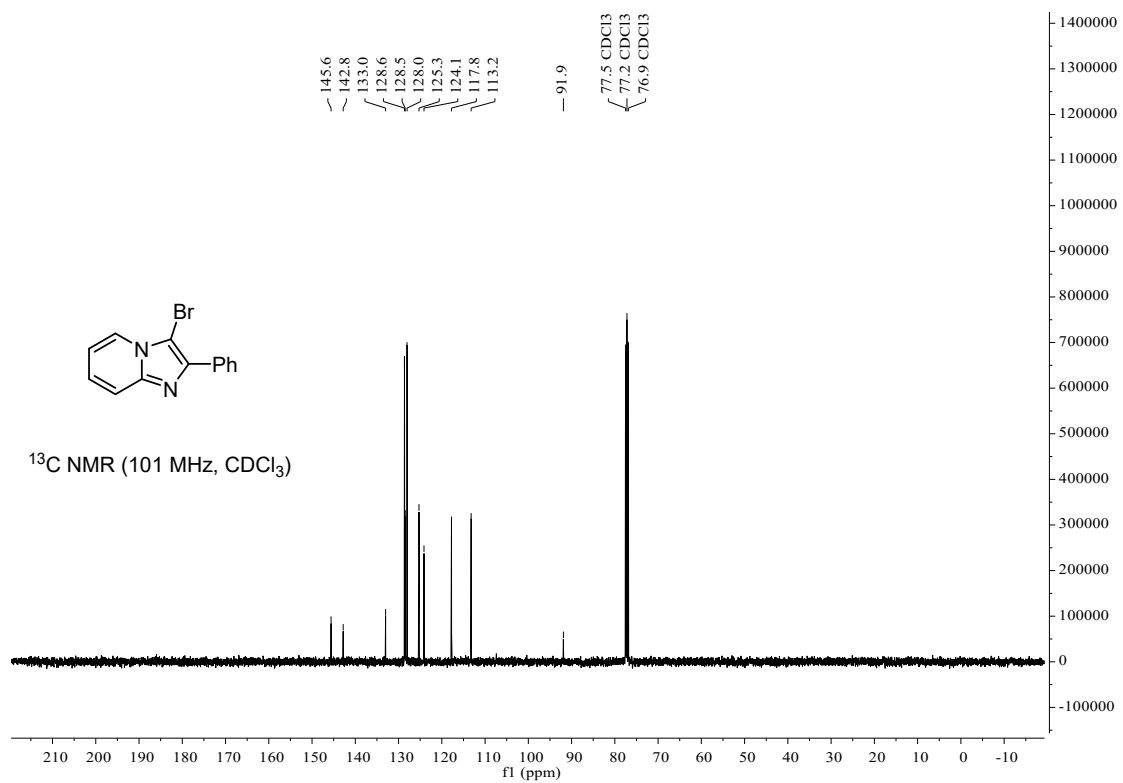

**Compound 37**

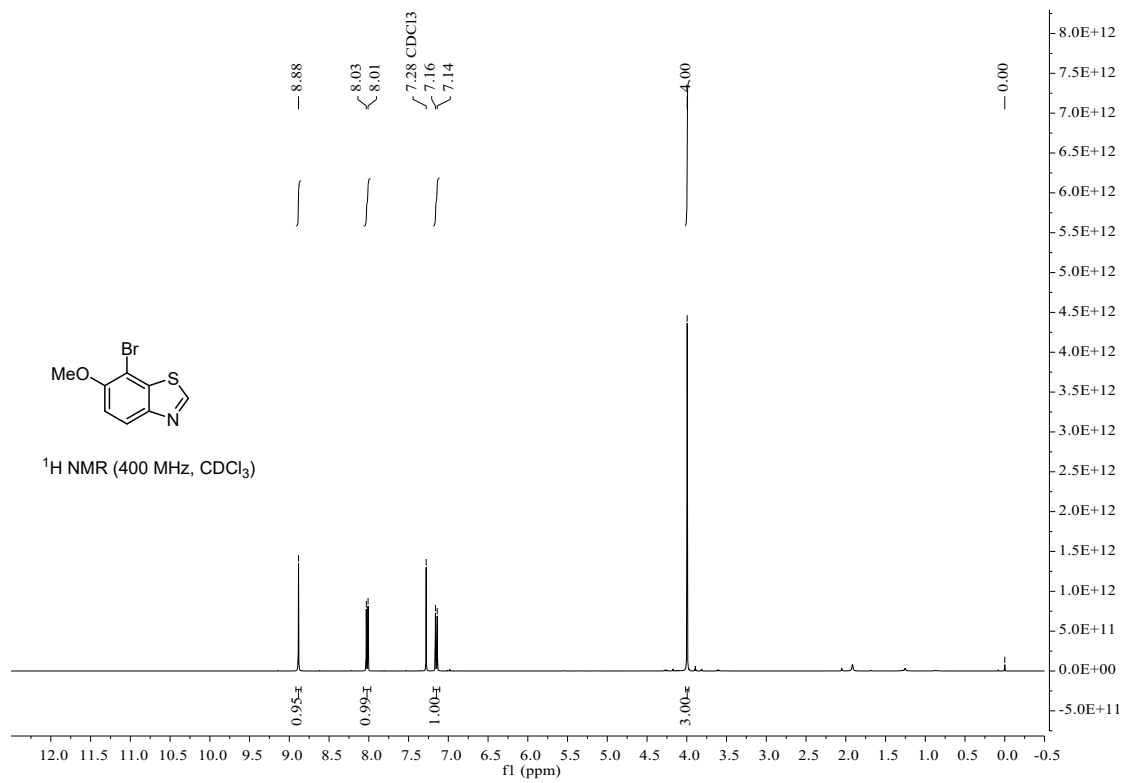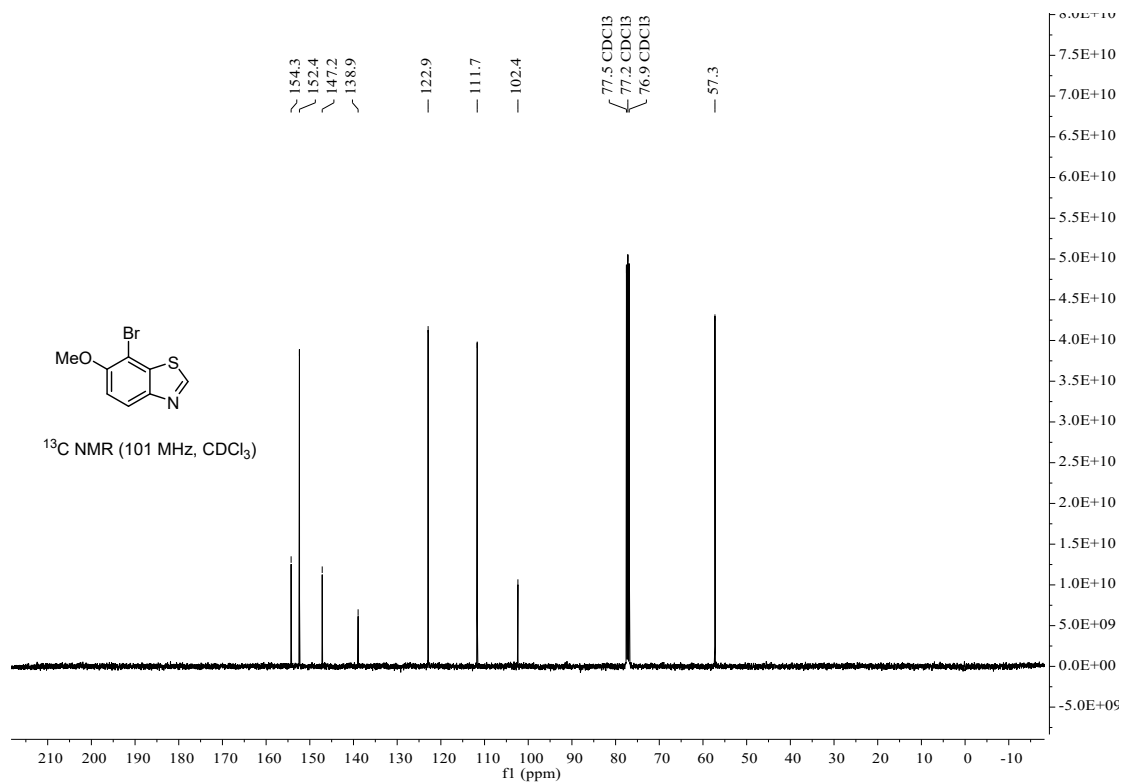

## Compound 38

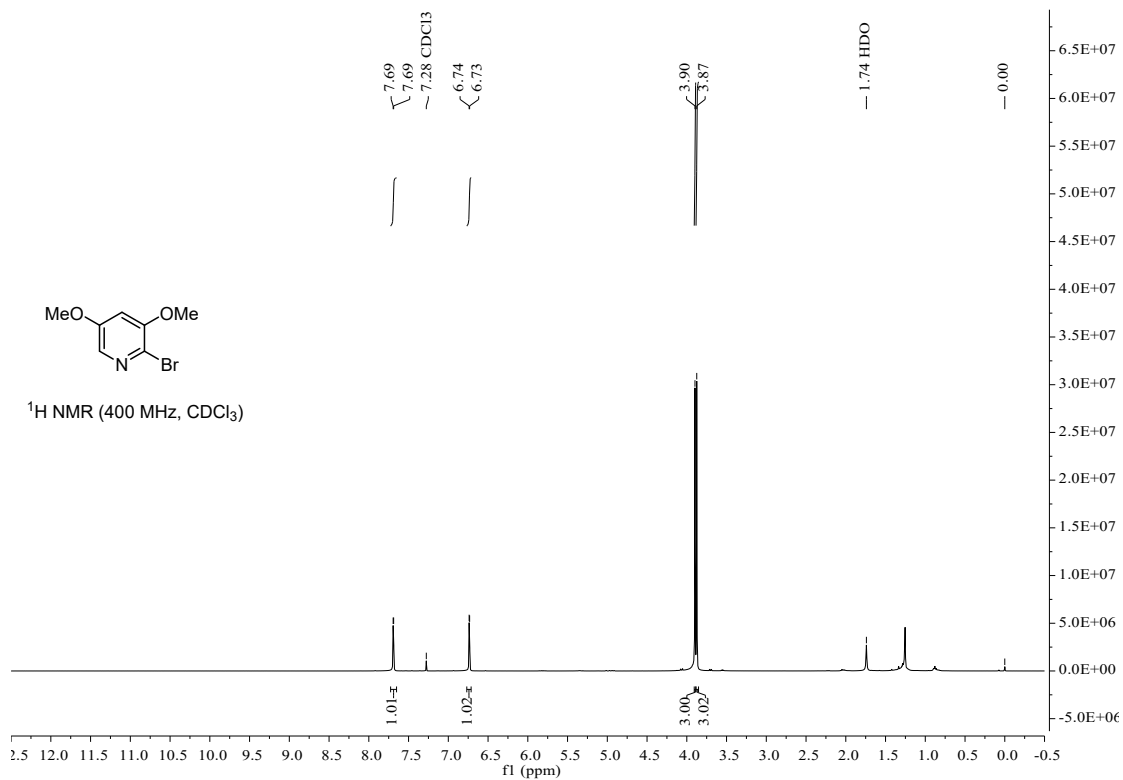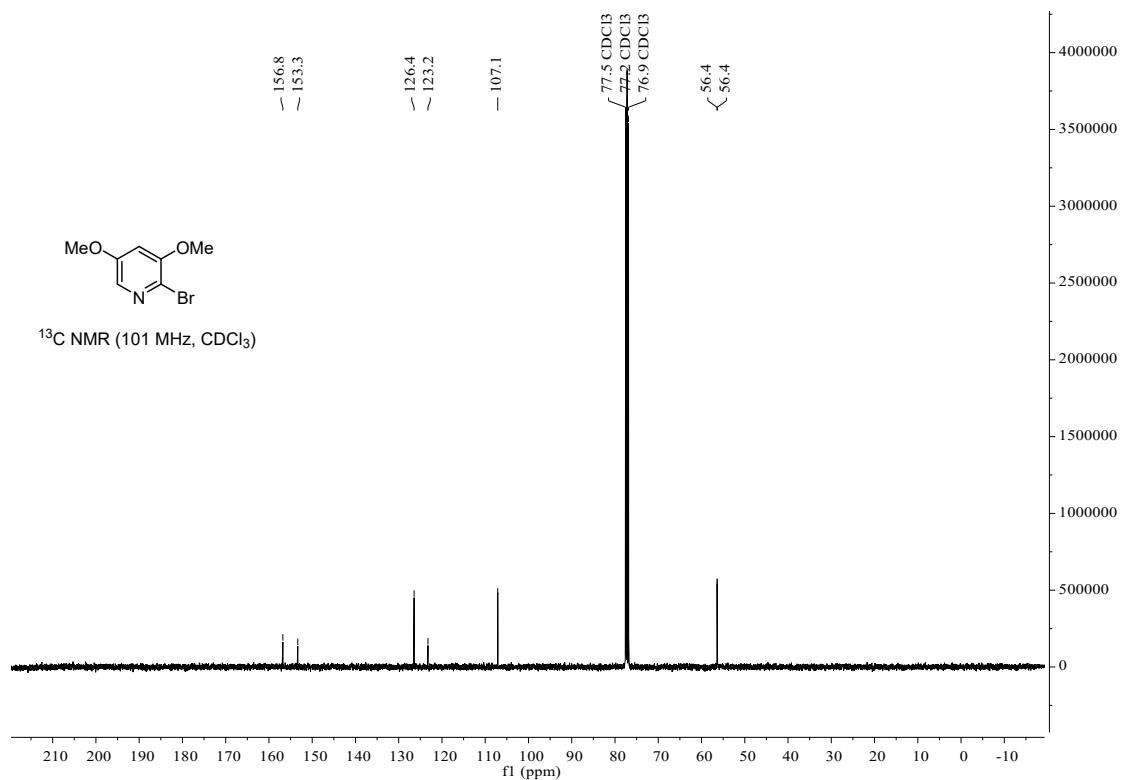

**Compound 39**

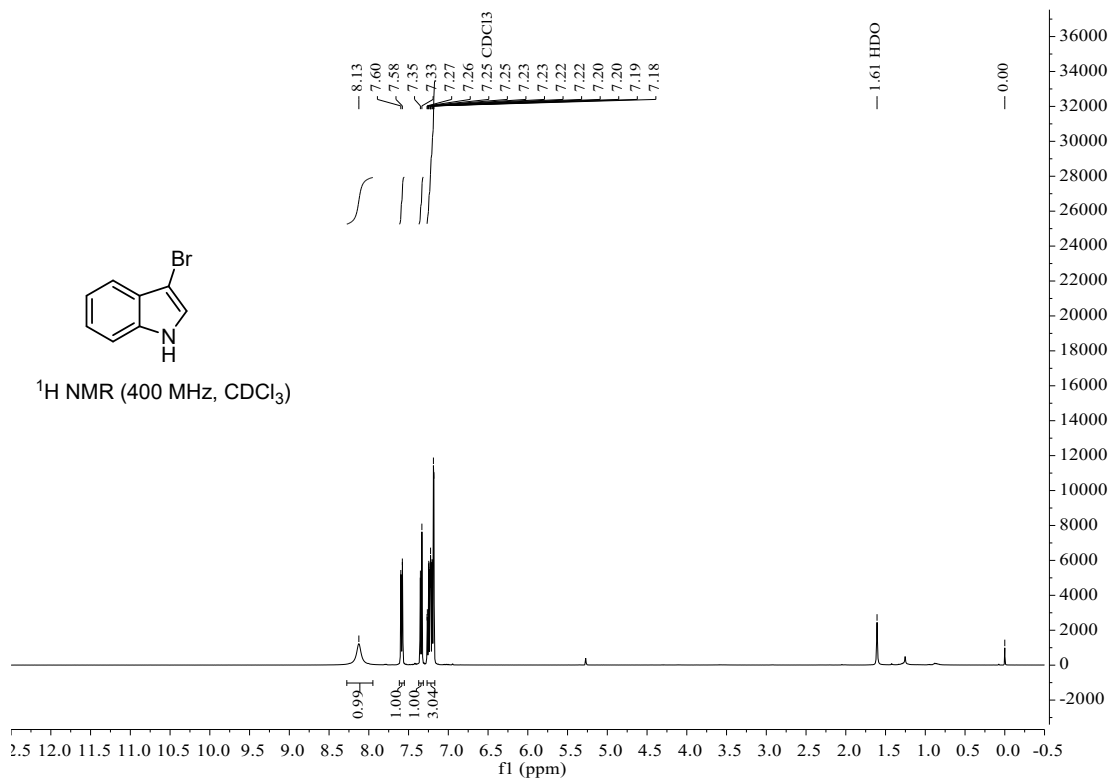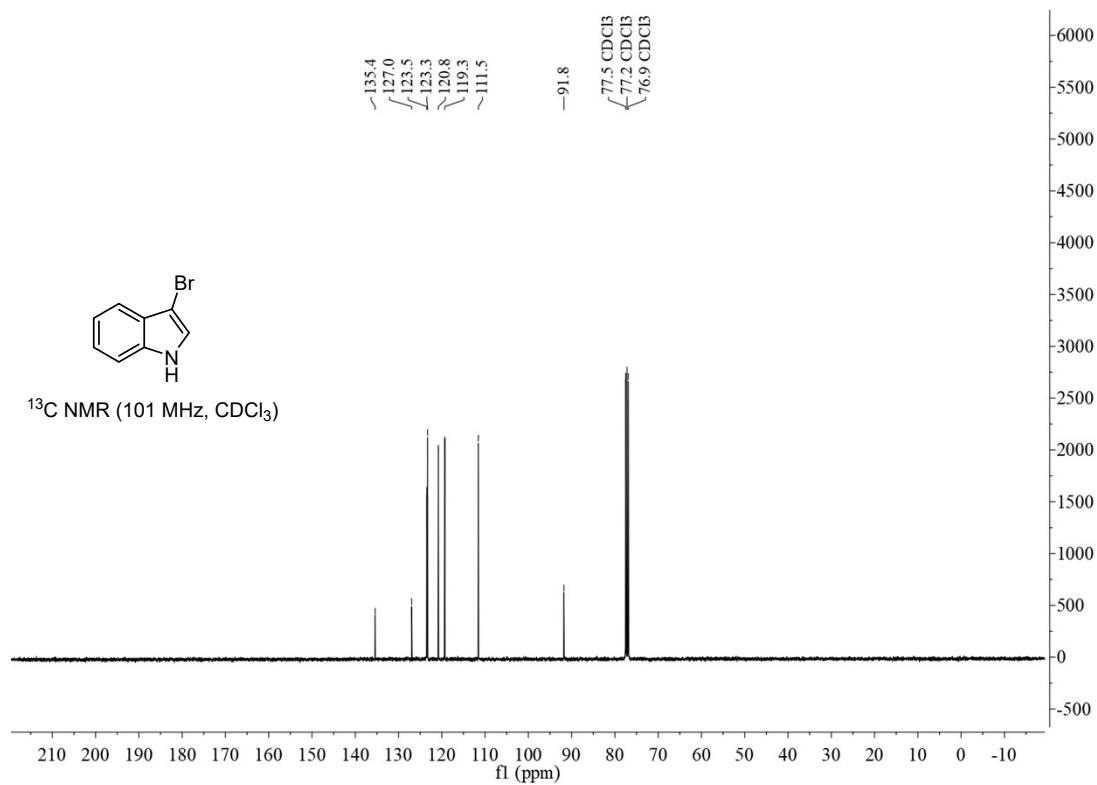

**Compound 40**



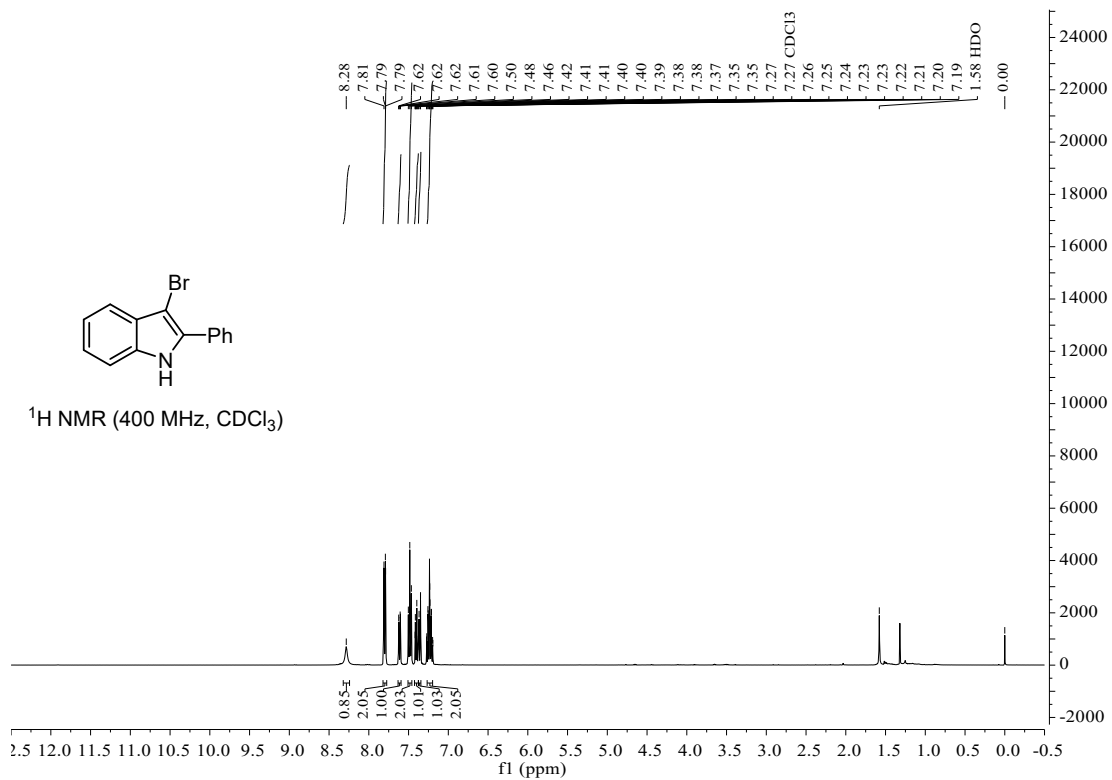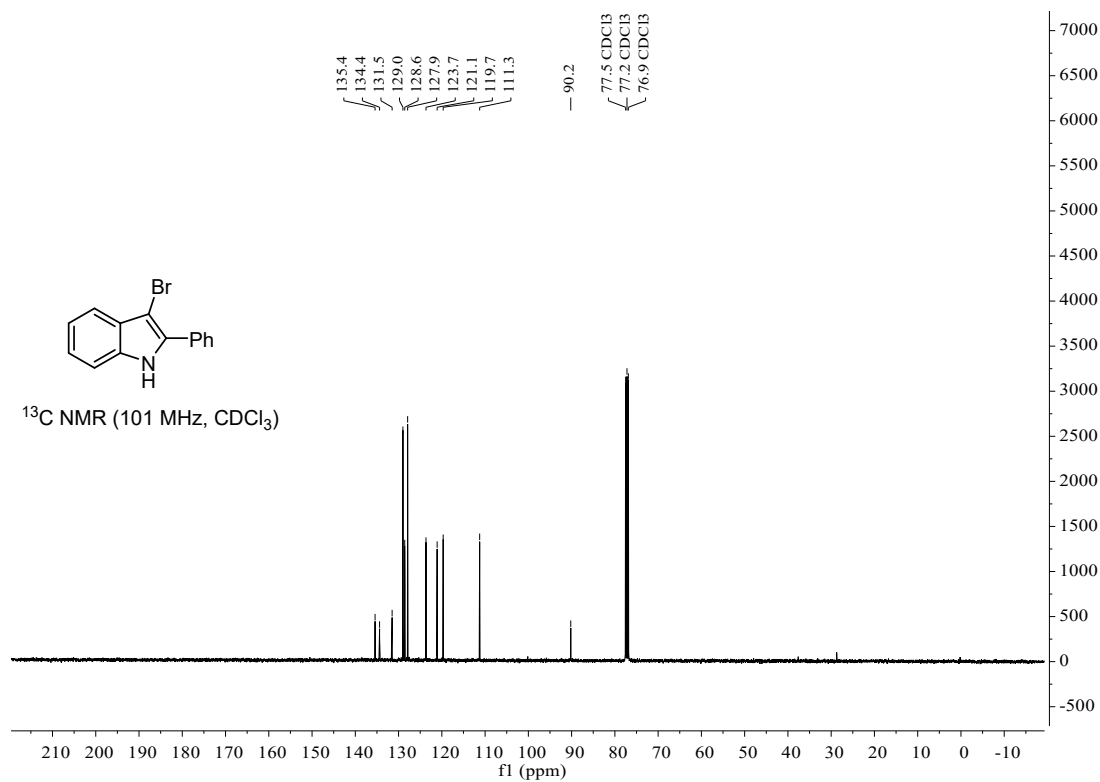

**Compound 41**

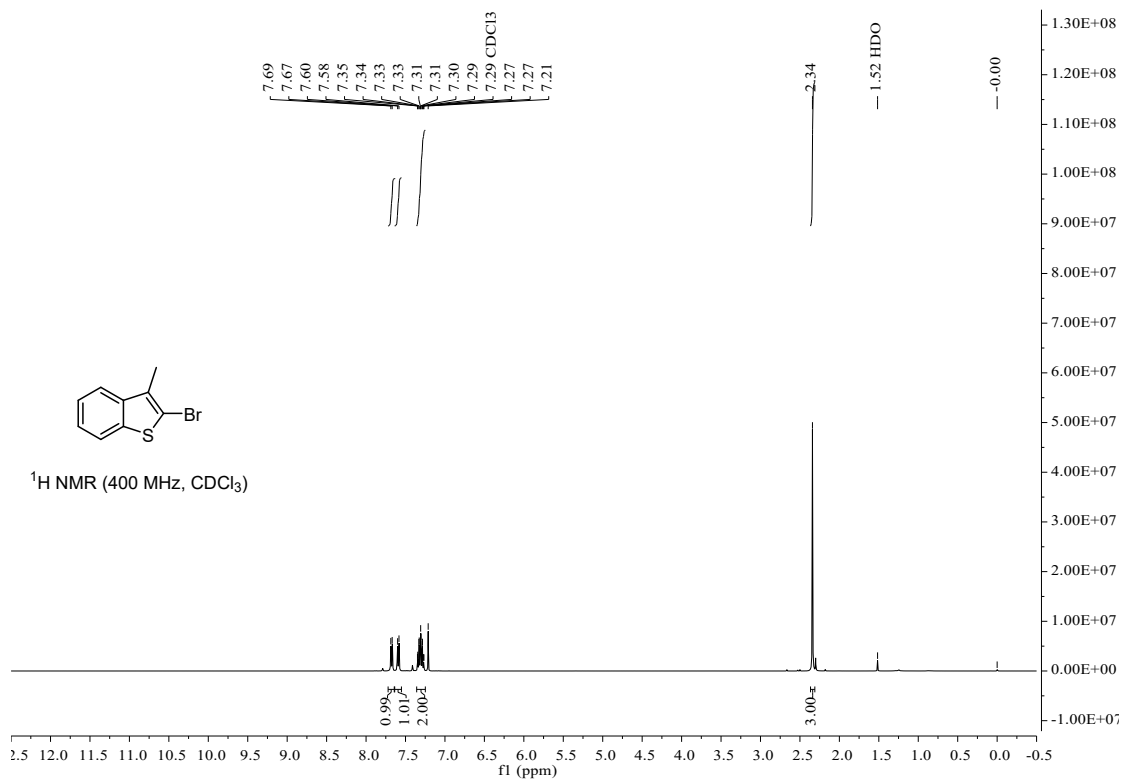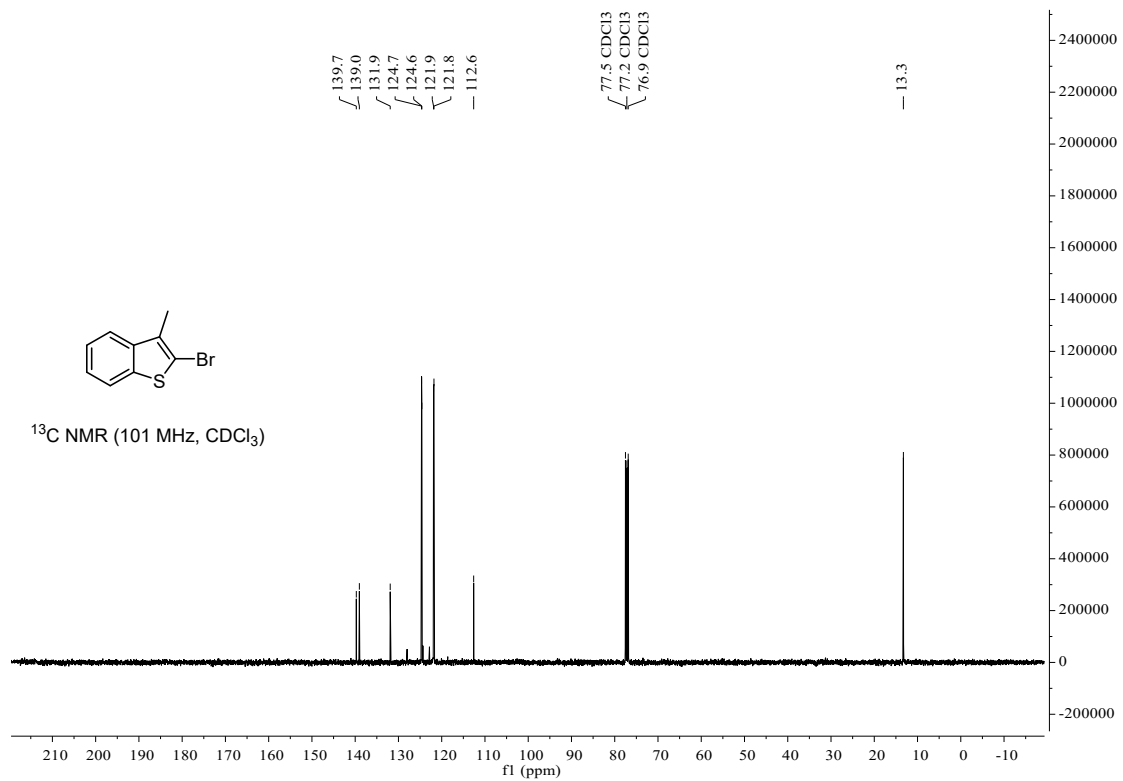

**Compound 42**

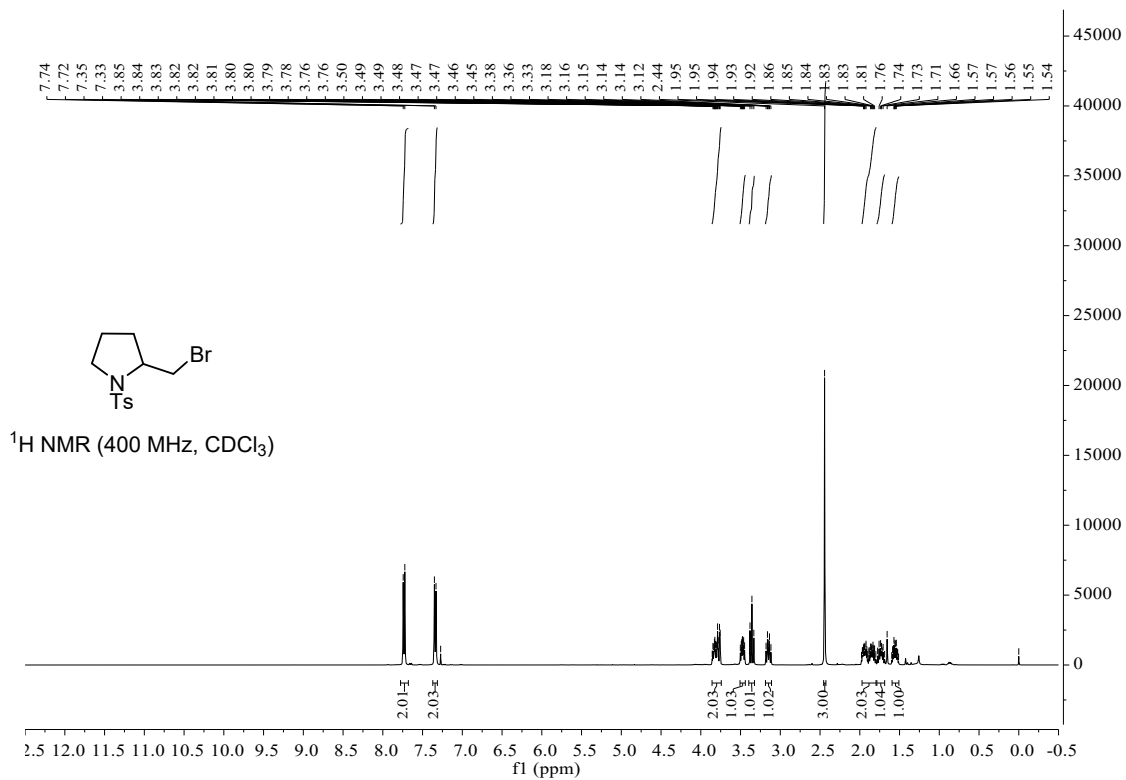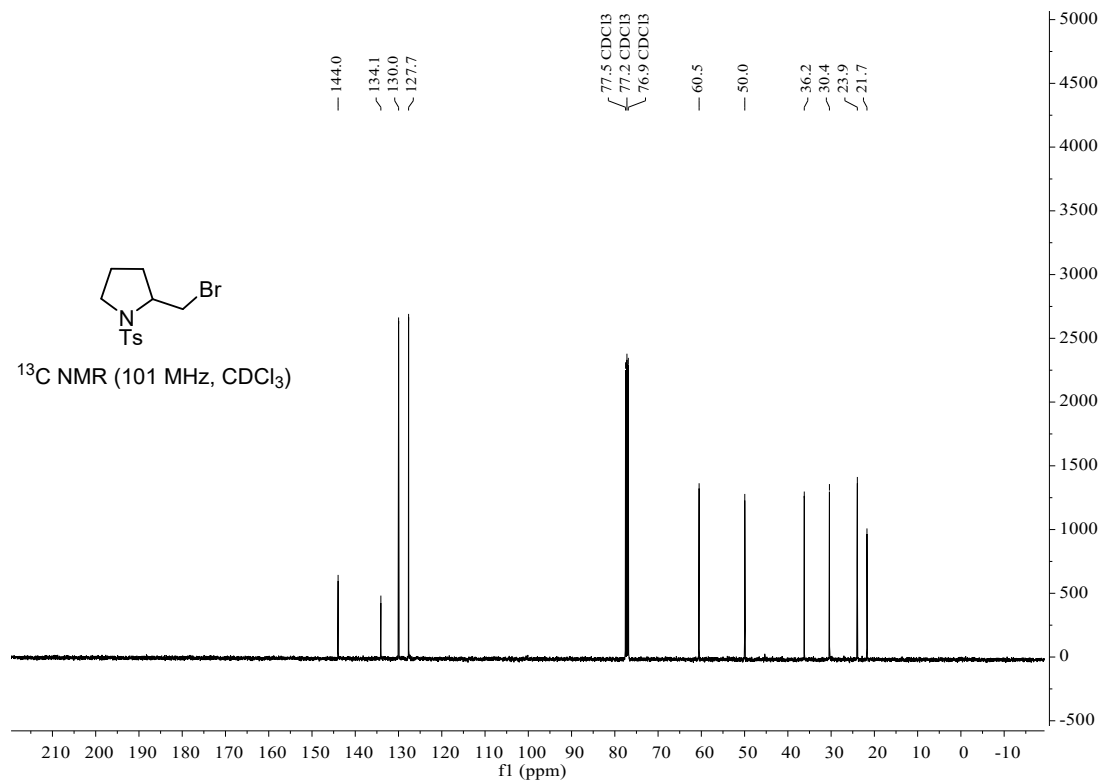

**Compound 43**

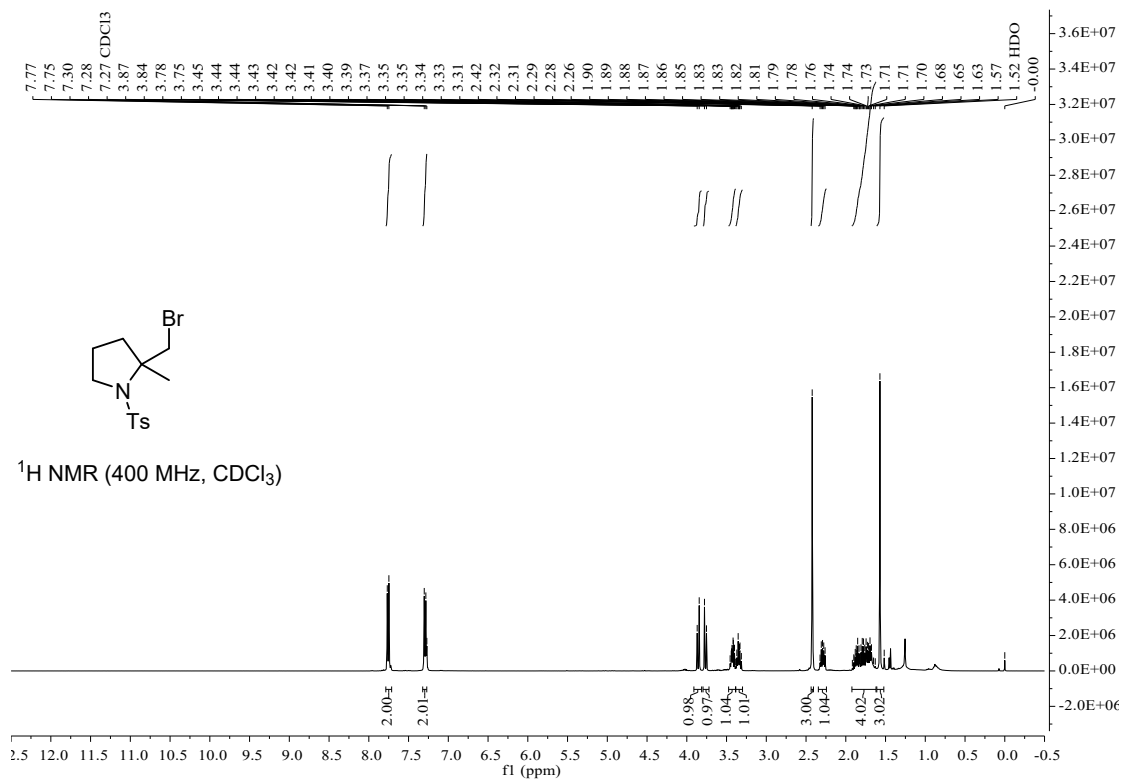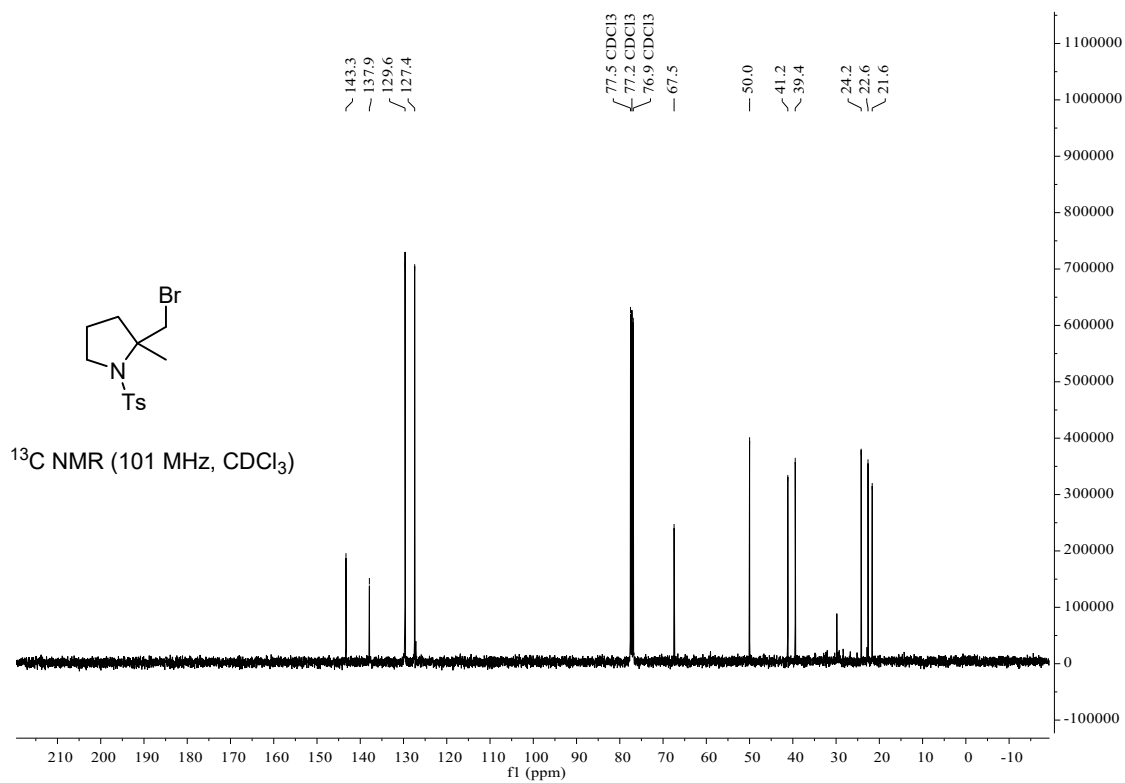

**Compound 44**

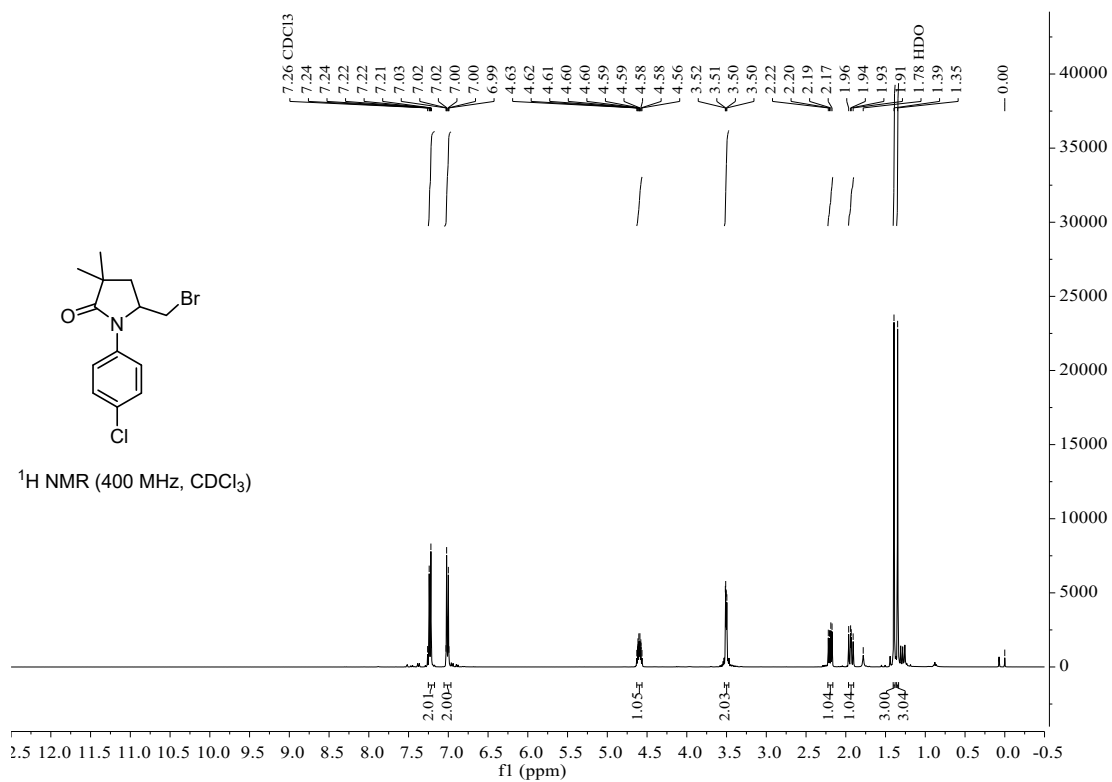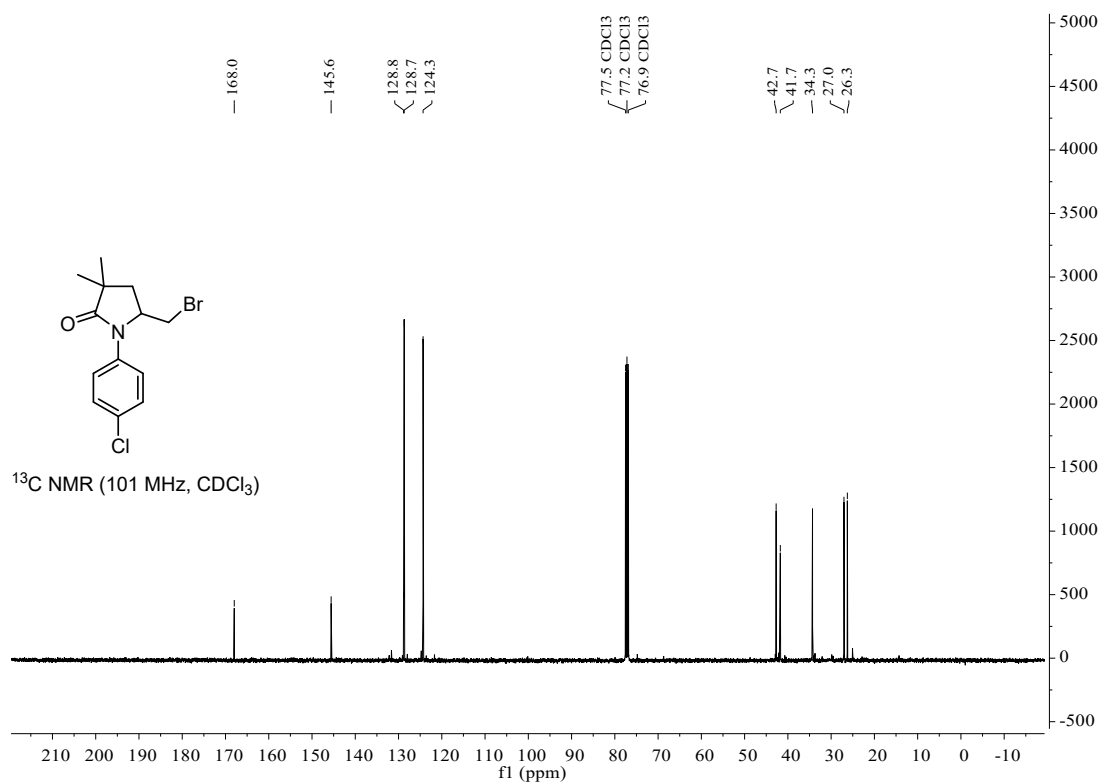

**Compound 45**

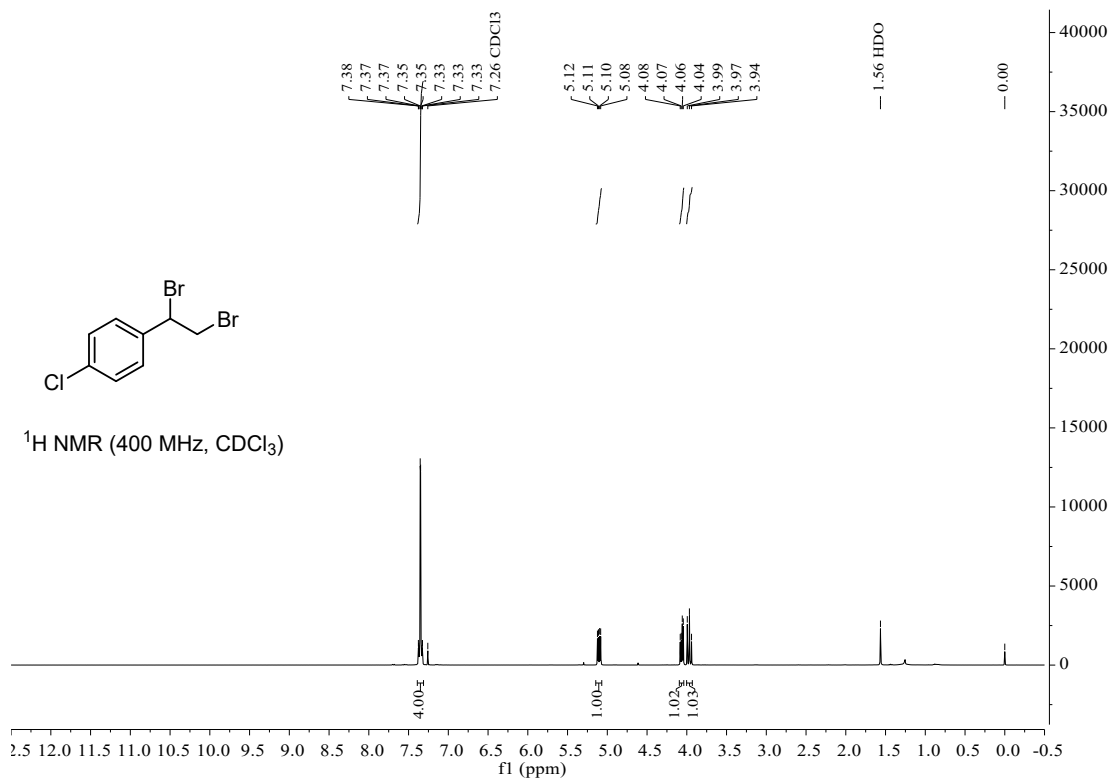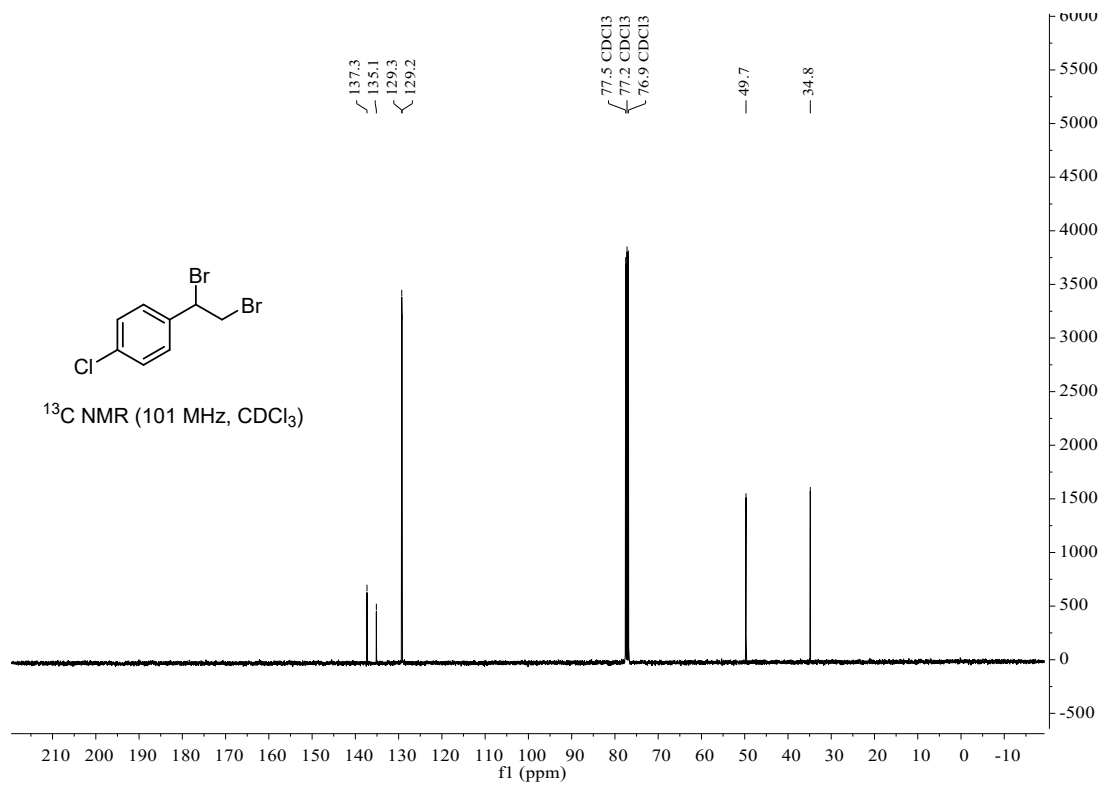

**Compound 46**

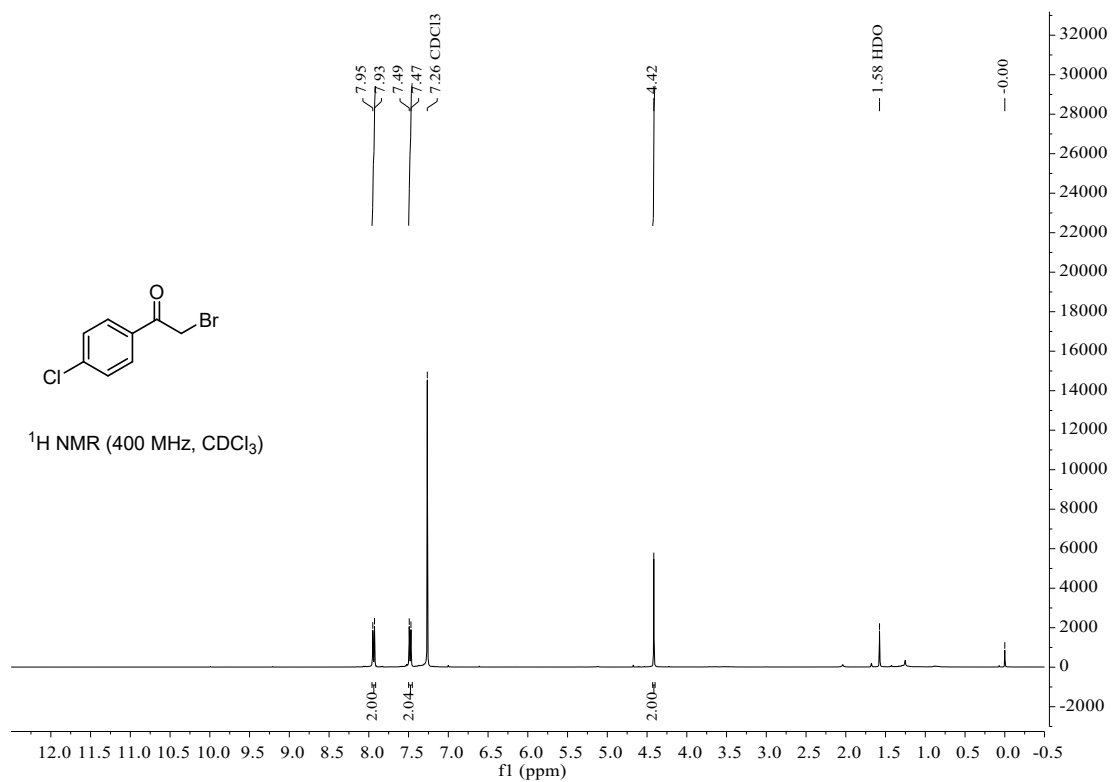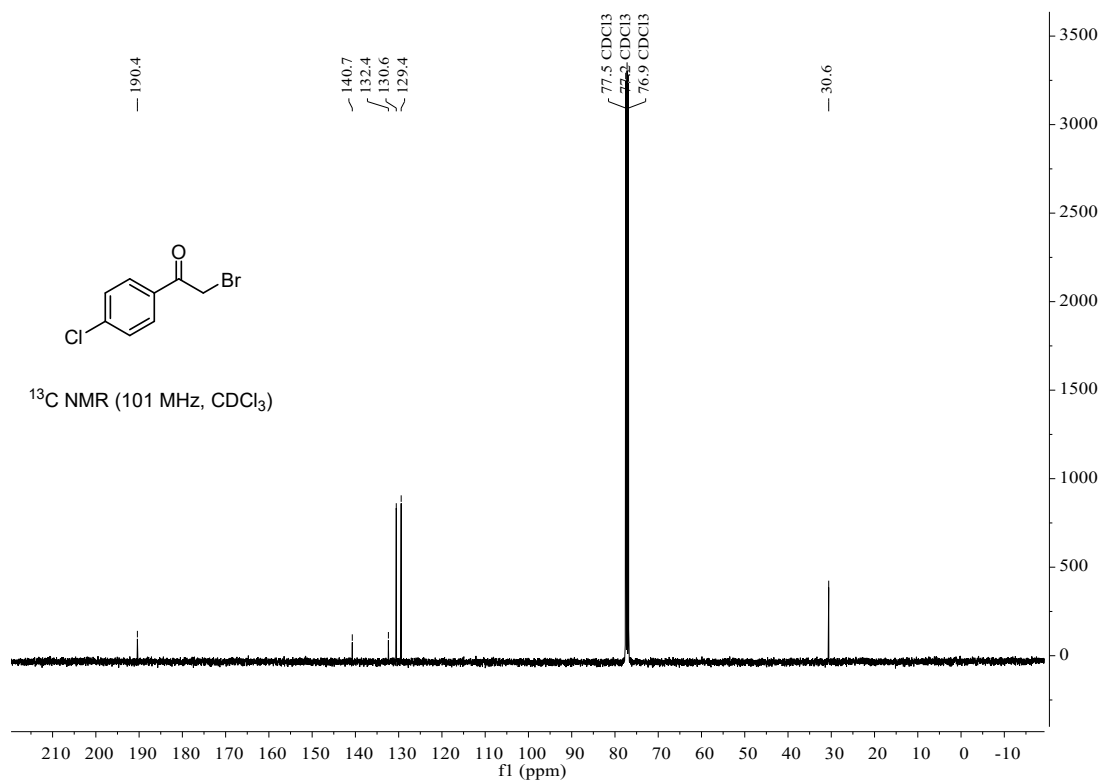

**Compound 47**

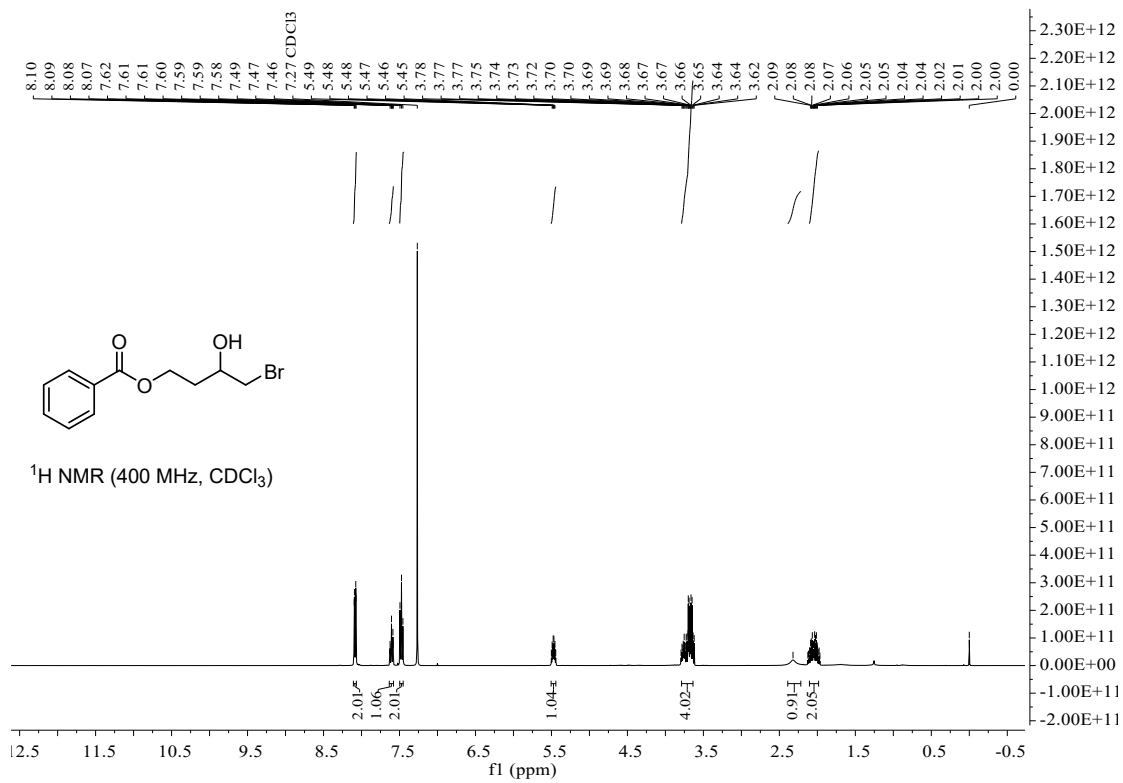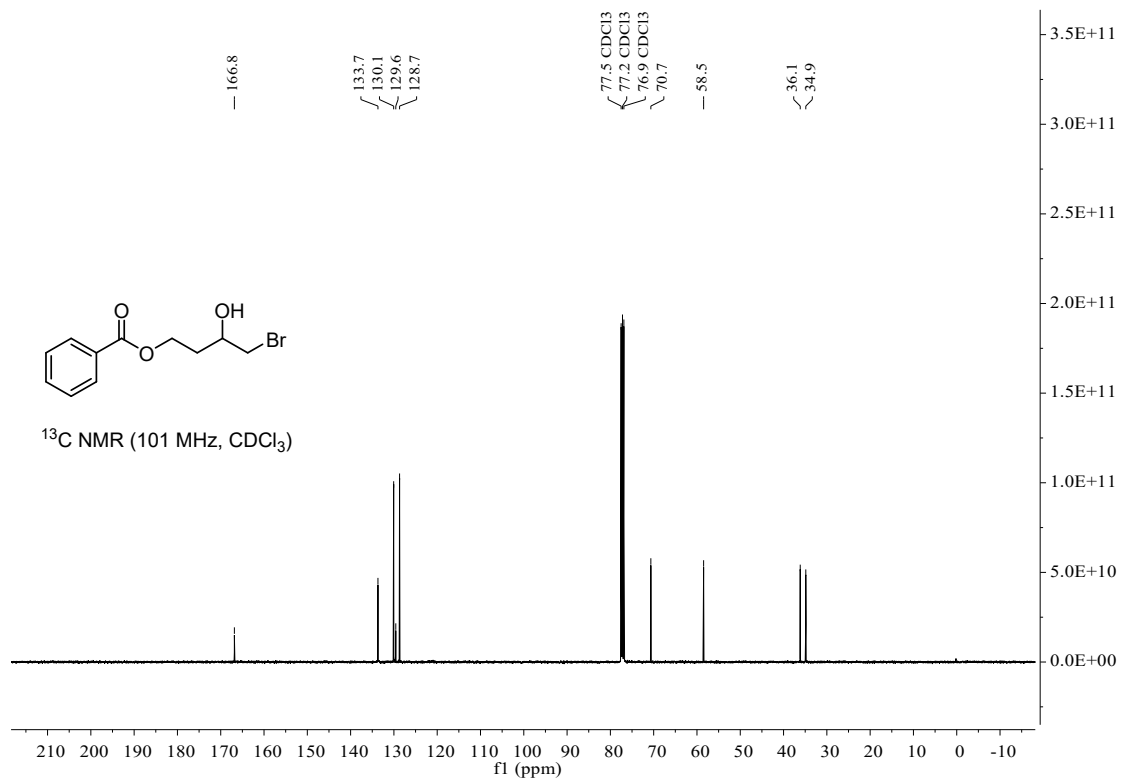

Supplement: d2qo01425d1.pdf [file d2qo01425d1.pdf]
